# Supplementary material for: An antibody drug engineered for prevention of malaria in global populations
Source: Research Square preprint supplement (doi:10.21203/rs.3.rs-2678519/v1), 2023-04-04
Supplement: Supplementary file 1 [file 2bf2eb42d0b02af318083bbb.xlsx]

## Sheet: Supplementary Table 2
Supplementary Table 2 | Binding data, in vivo functional data, and lineage properties of P3D derived mAbs
mAb ID	CSP ELISA	CSP peptide ELISA	HBsAg ELISA	LB inhibition (%)	LB dose	Lineage rank-size P3D	P3D-PB in lineage	Lineage PB of expanded lineages (%)a	SHM (H+L)	Vaccinee ID	RTS,S dosing	P3D CHMI	Convergent	Recalledb	IGHV	IGHD	IGHJ	IGKV/IGLV	IGKJ/IGLJ	Lineage	Lineage expansion
AB-000212	not reactive	NA	negative			12	1	NA	39	3	Fx017M	protected	FALSE	FALSE	IGHV3-73	IGHD3-16	IGHJ3	IGLV10-54	IGLJ3	IGHV3-73/15/IGLV10-54/12/0	1 PB
AB-000213	not reactive	NA	negative			11	2	0.55	33	3	Fx017M	protected	FALSE	TRUE	IGHV3-73	IGHD1-1	IGHJ4	IGLV10-54	IGLJ3	IGHV3-73/16/IGLV10-54/12/0	>1 PB, monoclonal
AB-000214	not reactive	NA	NA			12	1	NA	51	3	Fx017M	protected	FALSE	FALSE	IGHV2-5	IGHD6-6	IGHJ4	IGLV5-45	IGLJ1	IGHV2-5/12/IGLV5-45/10/0	1 PB
AB-000215	not reactive	NA	negative			15	1	NA	53	64	Fx017M	protected	FALSE	FALSE	IGHV3-73	IGHD2-21	IGHJ3	IGKV4-1	IGKJ2	IGHV3-73/18/IGKV4-1/10/0	1 PB
AB-000216	not reactive	NA	negative			12	1	NA	60	3	Fx017M	protected	FALSE	TRUE	IGHV3-7	IGHD2-15	IGHJ4	IGLV10-54	IGLJ3	IGHV3-7/11/IGLV10-54/12/0	1 PB
AB-000217	not reactive	NA	negative			15	1	NA	59	64	Fx017M	protected	FALSE	FALSE	IGHV3-73	IGHD5-5	IGHJ4	IGKV4-1	IGKJ1	IGHV3-73/10/IGKV4-1/10/0	1 PB
AB-000218	not reactive	NA	negative			1	23	13.6	53	7	Fx017M	protected	FALSE	FALSE	IGHV3-30	IGHD3-9	IGHJ6	IGLV5-45	IGLJ3	IGHV3-30/23/IGLV5-45/10/0	clonally expanded
AB-000219	not reactive	NA	negative			2	59	15.1	30	34	Fx017M	protected	TRUE	TRUE	IGHV4-39	IGHD3-9	IGHJ6	IGLV1-40	IGLJ3	IGHV4-39/23/IGLV1-40/12/0	clonally expanded
AB-000220	not reactive	NA	reactive			1	52	19.3	66	15	Fx017M	protected	FALSE	NA	IGHV3-48	IGHD5-5	IGHJ3	IGLV8-61	IGLJ3	IGHV3-48/22/IGLV8-61/11/0	clonally expanded
AB-000221	not reactive	NA	negative			11	1	NA	41	40	Fx017M	protected	FALSE	NA	IGHV3-23	IGHD6-19	IGHJ6	IGKV2-40	IGKJ4	IGHV3-23/22/IGKV2-40/10/0	1 PB
AB-000222	reactive	NANP6	negative	94.3	100µg	1	37	10.3	33	53	Fx017M	protected	TRUE	TRUE	IGHV3-33	IGHD2-21	IGHJ4	IGLV1-40	IGLJ1	IGHV3-33/18/IGLV1-40/12/0	clonally expanded
AB-000223	not reactive	NA	reactive			2	23	7.4	53	51	Fx017M	protected	FALSE	NA	IGHV1-69	IGHD3-22	IGHJ4	IGKV3-20	IGKJ2	IGHV1-69/18/IGKV3-20/10/0	clonally expanded
AB-000224	reactive	NANP6	negative	99.8	100µg	3	12	4.7	41	26	Fx017M	protected	FALSE	NA	IGHV3-49	IGHD3-10	IGHJ6	IGLV1-40	IGLJ3	IGHV3-49/19/IGLV1-40/12/0	clonally expanded
AB-000225	not reactive	NA	negative			1	50	10.2	45	39	Fx017M	protected	FALSE	NA	IGHV3-74	IGHD3-16	IGHJ6	IGLV1-40	IGLJ1	IGHV3-74/18/IGLV1-40/13/0	clonally expanded
AB-000226	not reactive	NA	NA			1	52	14.3	37	14	Fx017M	protected	TRUE	FALSE	IGHV3-74	IGHD6-25	IGHJ2	IGLV1-40	IGLJ1	IGHV3-74/16/IGLV1-40/13/0	clonally expanded
AB-000227	reactive	NANP6	negative	23.9	100µg	5	13	3.4	29	64	Fx017M	protected	FALSE	TRUE	IGHV3-33	IGHD3-22	IGHJ4	IGLV1-40	IGLJ1	IGHV3-33/18/IGLV1-40/12/0	clonally expanded
AB-000228	not reactive	NA	indeterminate			1	28	17.3	48	38	Fx017M	protected	FALSE	NA	IGHV3-23	IGHD2-15	IGHJ5	IGLV1-40	IGLJ3	IGHV3-23/15/IGLV1-40/12/0	clonally expanded
AB-000229	not reactive	NA	NA			7	11	2.7	46	8	Fx017M	protected	FALSE	NA	IGHV3-33	IGHD6-19	IGHJ6	IGKV1-9	IGKJ1	IGHV3-33/20/IGKV1-9/10/0	clonally expanded
AB-000230	not reactive	NA	negative			1	41	10.8	54	64	Fx017M	protected	FALSE	FALSE	IGHV4-59	IGHD2-8	IGHJ6	IGLV1-40	IGLJ3	IGHV4-59/28/IGLV1-40/12/0	clonally expanded
AB-000232	not reactive	NA	reactive			3	45	9.1	53	39	Fx017M	protected	FALSE	NA	IGHV3-23	IGHD6-19	IGHJ4	IGKV2-24	IGKJ4	IGHV3-23/22/IGKV2-24/10/0	clonally expanded
AB-000233	not reactive	NA	reactive			6	12	3	40	8	Fx017M	protected	FALSE	NA	IGHV3-15	IGHD3-3	IGHJ6	IGKV1-5	IGKJ2	IGHV3-15/18/IGKV1-5/10/0	clonally expanded
AB-000234	reactive	C-terminal (Pf16)	negative	44.9	300µg	5	13	4.2	41	51	Fx017M	protected	FALSE	NA	IGHV3-21	IGHD3-16	IGHJ6	IGLV3-21	IGLJ2	IGHV3-21/16/IGLV3-21/12/0	clonally expanded
AB-000235	not reactive	NA	NA			2	24	9.6	26	41	Fx017M	protected	FALSE	FALSE	IGHV3-74	IGHD3-10	IGHJ4	IGLV1-40	IGLJ1	IGHV3-74/18/IGLV1-40/13/0	clonally expanded
AB-000236	reactive	C-terminal (Pf16)	negative	43.5	300µg	4	15	4.9	33	51	Fx017M	protected	FALSE	NA	IGHV3-48	IGHD7-27	IGHJ5	IGLV3-1	IGLJ1	IGHV3-48/18/IGLV3-1/10/1	clonally expanded
AB-000237	not reactive	NA	negative			5	11	3.3	25	60	Fx017M	protected	TRUE	NA	IGHV1-3	IGHD3-10	IGHJ5	IGKV2-28	IGKJ4	IGHV1-3/9/IGKV2-28/10/0	clonally expanded
AB-000238	not reactive	NA	negative			3	14	3.8	60	233	012M	protected	FALSE	TRUE	IGHV3-30	IGHD4-4	IGHJ2	IGLV6-57	IGLJ7	IGHV3-30/15/IGLV6-57/11/0	clonally expanded
AB-000239	reactive	NANP6	reactive	99.7	300µg	2	48	9.8	37	39	Fx017M	protected	FALSE	NA	IGHV3-33	IGHD1-26	IGHJ4	IGKV1-5	IGKJ5	IGHV3-33/15/IGKV1-5/11/0	clonally expanded
AB-000241	not reactive	NA	negative			2	24	7.6	54	229	012M	protected	TRUE	NA	IGHV6-1	IGHD3-10	IGHJ4	IGKV2-28	IGKJ2	IGHV6-1/13/IGKV2-28/10/0	clonally expanded
AB-000242	not reactive	NA	negative			2	38	10.4	32	14	Fx017M	protected	FALSE	FALSE	IGHV3-7	IGHD3-10	IGHJ5	IGLV3-25	IGLJ2	IGHV3-7/7/IGLV3-25/12/0	clonally expanded
AB-000243	not reactive	NA	reactive			4	10	3.7	53	15	Fx017M	protected	FALSE	NA	IGHV3-23	IGHD3-10	IGHJ3	IGKV3-15	IGKJ2	IGHV3-23/17/IGKV3-15/11/0	clonally expanded
AB-000244	not reactive	NA	negative			5	1	NA	72	1	Fx017M	protected	FALSE	NA	IGHV3-23	IGHD3-10	IGHJ4	IGLV3-19	IGLJ3	IGHV3-23/9/IGLV3-19/12/0	1 PB
AB-000245	reactive	C-terminal (Pf16)	negative	9.4	300µg	4	12	3.7	28	5	Fx017M	protected	FALSE	FALSE	IGHV3-21	IGHD6-13	IGHJ4	IGLV3-21	IGLJ1	IGHV3-21/17/IGLV3-21/13/0	clonally expanded
AB-000247	not reactive	NA	reactive			5	13	3.2	35	8	Fx017M	protected	FALSE	NA	IGHV4-61	IGHD5-12	IGHJ6	IGKV3-20	IGKJ3	IGHV4-61/20/IGKV3-20/10/0	clonally expanded
AB-000248	not reactive	NA	reactive			2	19	5.9	37	5	Fx017M	protected	FALSE	FALSE	IGHV2-70D	IGHD3-22	IGHJ5	IGLV2-11	IGLJ2	IGHV2-70D/11/IGLV2-11/11/0	clonally expanded
AB-000249	not reactive	NA	reactive			1	24	6.5	40	233	012M	protected	FALSE	TRUE	IGHV4-31	IGHD6-19	IGHJ5	IGLV2-23	IGLJ2	IGHV4-31/19/IGLV2-23/13/0	clonally expanded
AB-000250	reactive	NANP6	negative	99.9	300µg	1	13	3.6	28	3	Fx017M	protected	FALSE	TRUE	IGHV3-49	IGHD3-3	IGHJ6	IGKV2D-29	IGKJ1	IGHV3-49/14/IGKV2D-29/10/0	clonally expanded
AB-000251	not reactive	NA	reactive			2	24	8.2	38	46	Fx017M	protected	TRUE	TRUE	IGHV1-2	IGHD1-26	IGHJ6	IGKV1-9	IGKJ4	IGHV1-2/14/IGKV1-9/10/0	clonally expanded
AB-000252	not reactive	NA	reactive			4	13	3.6	44	53	Fx017M	protected	FALSE	TRUE	IGHV1-69	IGHD6-19	IGHJ1	IGKV3-11	IGKJ2	IGHV1-69/19/IGKV3-11/11/0	clonally expanded
AB-000253	not reactive	NA	reactive			1	32	8	51	8	Fx017M	protected	FALSE	NA	IGHV3-23	IGHD6-19	IGHJ4	IGLV2-8	IGLJ3	IGHV3-23/21/IGLV2-8/11/0	clonally expanded
AB-000254	not reactive	NA	negative			1	25	9.8	24	26	Fx017M	protected	TRUE	NA	IGHV3-74	IGHD3-10	IGHJ1	IGLV2-11	IGLJ2	IGHV3-74/16/IGLV2-11/12/0	clonally expanded
AB-000255	not reactive	NA	reactive			3	19	4.7	39	8	Fx017M	protected	FALSE	NA	IGHV4-39	IGHD5-5	IGHJ4	IGKV3-11	IGKJ4	IGHV4-39/16/IGKV3-11/11/0	clonally expanded
AB-000256	not reactive	NA	reactive			2	17	4.7	54	53	Fx017M	protected	FALSE	TRUE	IGHV4-39	IGHD3-16	IGHJ4	IGKV3-15	IGKJ1	IGHV4-39/18/IGKV3-15/9/0	clonally expanded
AB-000257	not reactive	NA	negative			4	13	3.3	41	34	Fx017M	protected	TRUE	FALSE	IGHV1-2	IGHD5-5	IGHJ3	IGLV1-44	IGLJ1	IGHV1-2/15/IGLV1-44/12/0	clonally expanded
AB-000258	not reactive	NA	reactive			2	20	7.4	53	15	Fx017M	protected	FALSE	NA	IGHV1-45	IGHD6-13	IGHJ6	IGLV2-8	IGLJ2	IGHV1-45/27/IGLV2-8/11/0	clonally expanded
AB-000259	not reactive	NA	negative			10	1	NA	41	6	Fx017M	protected	FALSE	NA	IGHV3-11	IGHD3-3	IGHJ4	IGKV1-5	IGKJ1	IGHV3-11/13/IGKV1-5/9/0	1 PB
AB-000260	not reactive	NA	NA			2	12	5	82	6	Fx017M	protected	FALSE	NA	IGHV3-11	IGHD3-3	IGHJ4	IGLV9-49	IGLJ3	IGHV3-11/13/IGLV9-49/14/0	clonally expanded
AB-000262	not reactive	NA	negative			5	5	2.7	34	24	Fx017M	protected	FALSE	NA	IGHV2-5	IGHD3-16	IGHJ5	IGLV5-45	IGLJ2	IGHV2-5/14/IGLV5-45/10/0	clonally expanded
AB-000263	not reactive	NA	NA			8	5	2.2	48	22	Fx017M	protected	FALSE	NA	IGHV3-66	IGHD3-10	IGHJ4	IGLV5-45	IGLJ2	IGHV3-66/18/IGLV5-45/10/0	clonally expanded
AB-000264	not reactive	NA	negative			10	3	1.3	55	22	Fx017M	protected	FALSE	NA	IGHV3-73	IGHD3-22	IGHJ4	IGKV1-5	IGKJ3	IGHV3-73/16/IGKV1-5/10/0	clonally expanded
AB-000265	not reactive	NA	NA			8	1	NA	20	209	012M	protected	FALSE	NA	IGHV3-30	IGHD1-1	IGHJ4	IGLV10-54	IGLJ3	IGHV3-30/8/IGLV10-54/12/0	1 PB
AB-000267	not reactive	NA	NA			3	9	2.8	52	40	Fx017M	protected	FALSE	NA	IGHV3-74	IGHD2-8	IGHJ4	IGLV10-54	IGLJ2	IGHV3-74/7/IGLV10-54/12/0	clonally expanded
AB-000268	not reactive	NA	NA			14	4	1	28	8	Fx017M	protected	TRUE	NA	IGHV3-15	IGHD1-26	IGHJ4	IGLV10-54	IGLJ3	IGHV3-15/15/IGLV10-54/12/0	clonally expanded
AB-000269	not reactive	NA	negative			9	5	1.3	25	34	Fx017M	protected	FALSE	TRUE	IGHV3-73	IGHD1-26	IGHJ4	IGKV4-1	IGKJ1	IGHV3-73/15/IGKV4-1/10/0	clonally expanded
AB-000270	not reactive	NA	negative			11	1	NA	46	41	Fx017M	protected	TRUE	FALSE	IGHV1-18	IGHD5-12	IGHJ4	IGLV10-54	IGLJ3	IGHV1-18/11/IGLV10-54/12/0	1 PB
AB-000271	not reactive	NA	negative			13	3	0.79	45	64	Fx017M	protected	FALSE	FALSE	IGHV3-73	IGHD5-5	IGHJ4	IGKV3-11	IGKJ5	IGHV3-73/18/IGKV3-11/11/0	>1 PB, monoclonal
AB-000272	not reactive	NA	NA			15	1	NA	21	64	Fx017M	protected	FALSE	FALSE	IGHV4-39	IGHD3-16	IGHJ4	IGLV5-45	IGLJ2	IGHV4-39/11/IGLV5-45/10/0	1 PB
AB-000274	not reactive	NA	NA			7	6	2.2	51	15	Fx017M	protected	FALSE	NA	IGHV1-3	IGHD6-19	IGHJ3	IGLV1-40	IGLJ2	IGHV1-3/16/IGLV1-40/12/0	clonally expanded
AB-000275	not reactive	NA	negative			13	3	0.97	52	51	Fx017M	protected	FALSE	NA	IGHV3-66	IGHD2-8	IGHJ3	IGLV8-61	IGLJ3	IGHV3-66/21/IGLV8-61/11/0	clonally expanded
AB-000278	not reactive	NA	negative			11	2	0.81	48	48	Fx017M	protected	FALSE	NA	IGHV3-66	IGHD4-17	IGHJ4	IGLV8-61	IGLJ3	IGHV3-66/15/IGLV8-61/11/0	clonally expanded
AB-000279	not reactive	NA	negative			2	6	3.8	42	52	Fx017M	protected	FALSE	NA	IGHV1-3	IGHD5-5	IGHJ5	IGLV1-40	IGLJ2	IGHV1-3/16/IGLV1-40/12/0	clonally expanded
AB-000280	not reactive	NA	negative			8	2	1.1	40	24	Fx017M	protected	TRUE	NA	IGHV3-30	IGHD6-6	IGHJ6	IGLV3-27	IGLJ3	IGHV3-30/8/IGLV3-27/11/0	clonally expanded
AB-000281	not reactive	NA	NA			10	4	1.2	25	5	Fx017M	protected	FALSE	FALSE	IGHV3-11	IGHD3-3	IGHJ6	IGLV5-45	IGLJ3	IGHV3-11/19/IGLV5-45/10/0	clonally expanded
AB-000282	not reactive	NA	reactive			1	18	7.8	41	22	Fx017M	protected	TRUE	NA	IGHV4-39	IGHD3-9	IGHJ6	IGLV1-40	IGLJ7	IGHV4-39/23/IGLV1-40/14/0	clonally expanded
AB-000283	not reactive	NA	reactive			1	12	4.8	64	48	Fx017M	protected	FALSE	NA	IGHV3-33	IGHD2-2	IGHJ4	IGKV1-39	IGKJ4	IGHV3-33/15/IGKV1-39/12/0	clonally expanded
AB-000284	not reactive	NA	negative			6	5	4.1	43	63	Fx017M	protected	TRUE	NA	IGHV3-30	IGHD1-20	IGHJ4	IGLV3-27	IGLJ3	IGHV3-30/8/IGLV3-27/11/0	clonally expanded
AB-000285	indeterminate	NA	negative			5	12	3.1	41	34	Fx017M	protected	FALSE	FALSE	IGHV4-61	IGHD1-26	IGHJ4	IGLV7-46	IGLJ3	IGHV4-61/10/IGLV7-46/12/0	clonally expanded
AB-000286	not reactive	NA	negative			10	4	1.4	37	46	Fx017M	protected	TRUE	FALSE	IGHV3-21	IGHD2-2	IGHJ6	IGLV8-61	IGLJ3	IGHV3-21/17/IGLV8-61/11/0	clonally expanded
AB-000287	not reactive	NA	negative			3	22	6	72	14	Fx017M	protected	FALSE	FALSE	IGHV1-8	IGHD3-10	IGHJ6	IGLV1-40	IGLJ3	IGHV1-8/17/IGLV1-40/12/0	clonally expanded
AB-000288	not reactive	NA	negative			11	5	1.2	46	25	Fx017M	not protected	FALSE	FALSE	IGHV2-5	IGHD6-13	IGHJ4	IGLV1-40	IGLJ1	IGHV2-5/17/IGLV1-40/13/0	clonally expanded
AB-000289	not reactive	NA	negative			5	7	2.2	40	40	Fx017M	protected	FALSE	NA	IGHV7-4-1	IGHD6-13	IGHJ6	IGKV3-11	IGKJ4	IGHV7-4-1/20/IGKV3-11/9/0	clonally expanded
AB-000291	not reactive	NA	NA			8	6	1.9	53	5	Fx017M	protected	FALSE	FALSE	IGHV3-33	IGHD3-10	IGHJ6	IGLV1-44	IGLJ3	IGHV3-33/14/IGLV1-44/12/0	clonally expanded
AB-000293	not reactive	NA	negative			15	1	NA	48	51	Fx017M	protected	FALSE	NA	IGHV3-7	IGHD7-27	IGHJ4	IGKV2-24	IGKJ2	IGHV3-7/10/IGKV2-24/10/0	1 PB
AB-000294	not reactive	NA	negative			2	20	5.3	47	64	Fx017M	protected	FALSE	FALSE	IGHV3-30	IGHD3-10	IGHJ4	IGKV1D-13	IGKJ4	IGHV3-30/15/IGKV1D-13/10/0	clonally expanded
AB-000295	not reactive	NA	NA			11	4	1.2	66	60	Fx017M	protected	FALSE	NA	IGHV1-3	IGHD2-2	IGHJ5	IGLV1-40	IGLJ2	IGHV1-3/20/IGLV1-40/13/0	>1 PB, monoclonal
AB-000297	not reactive	NA	NA			13	2	0.6	40	60	Fx017M	protected	TRUE	NA	IGHV3-30	IGHD3-3	IGHJ4	IGLV3-27	IGLJ3	IGHV3-30/7/IGLV3-27/11/0	clonally expanded
AB-000298	not reactive	NA	negative			12	1	NA	35	3	Fx017M	protected	FALSE	FALSE	IGHV3-49	IGHD3-16	IGHJ4	IGKV1-17	IGKJ1	IGHV3-49/11/IGKV1-17/10/1	1 PB
AB-000299	not reactive	NA	negative			10	3	1.2	61	48	Fx017M	protected	FALSE	NA	IGHV3-72	IGHD2-8	IGHJ4	IGKV2-24	IGKJ5	IGHV3-72/15/IGKV2-24/10/0	clonally expanded
AB-000300	indeterminate	NA	negative			11	3	0.77	38	34	Fx017M	protected	FALSE	FALSE	IGHV3-7	IGHD4-4	IGHJ5	IGLV7-46	IGLJ2	IGHV3-7/7/IGLV7-46/10/0	clonally expanded
AB-000301	not reactive	NA	reactive			5	9	3.1	24	46	Fx017M	protected	TRUE	TRUE	IGHV4-39	IGHD6-6	IGHJ6	IGLV1-40	IGLJ2	IGHV4-39/23/IGLV1-40/13/0	clonally expanded
AB-000302	not reactive	NA	NA			13	3	0.91	44	203	012M	protected	FALSE	TRUE	IGHV6-1	IGHD1-1	IGHJ3	IGKV4-1	IGKJ1	IGHV6-1/11/IGKV4-1/10/0	clonally expanded
AB-000303	not reactive	NA	negative			7	1	NA	26	52	Fx017M	protected	FALSE	NA	IGHV3-15	IGHD2-2	IGHJ4	IGLV3-27	IGLJ3	IGHV3-15/7/IGLV3-27/10/0	1 PB
AB-000304	not reactive	NA	negative			12	3	0.84	28	53	Fx017M	protected	TRUE	FALSE	IGHV3-30	IGHD3-16	IGHJ6	IGLV3-27	IGLJ3	IGHV3-30/7/IGLV3-27/11/0	clonally expanded
AB-000305	indeterminate	NA	reactive			1	84	21.5	53	34	Fx017M	protected	TRUE	TRUE	IGHV4-39	IGHD6-19	IGHJ6	IGLV1-40	IGLJ3	IGHV4-39/21/IGLV1-40/12/0	clonally expanded
AB-000306	not reactive	NA	reactive			11	4	1.1	52	53	Fx017M	protected	TRUE	TRUE	IGHV6-1	IGHD4-17	IGHJ6	IGKV4-1	IGKJ5	IGHV6-1/7/IGKV4-1/10/0	clonally expanded
AB-000307	reactive	NT	negative			11	4	1.1	35	29	Fx017M	protected	TRUE	NA	IGHV3-30	IGHD2-8	IGHJ4	IGKV1-39	IGKJ3	IGHV3-30/12/IGKV1-39/10/0	clonally expanded
AB-000308	reactive	indeterminate	NA			5	8	3.1	31	26	Fx017M	protected	TRUE	NA	IGHV3-33	IGHD1-26	IGHJ5	IGLV1-40	IGLJ1	IGHV3-33/17/IGLV1-40/12/0	clonally expanded
AB-000309	not reactive	NA	negative			3	18	5.6	53	5	Fx017M	protected	TRUE	FALSE	IGHV3-23	IGHD2-21	IGHJ2	IGKV3-20	IGKJ1	IGHV3-23/14/IGKV3-20/10/0	clonally expanded
AB-000310	reactive	C-terminal (Pf16)	negative	0	100µg	8	5	1.4	34	3	Fx017M	protected	TRUE	TRUE	IGHV3-30	IGHD1-26	IGHJ4	IGKV1-39	IGKJ2	IGHV3-30/11/IGKV1-39/10/0	clonally expanded
AB-000311	reactive	NANP6	negative	97.2	100µg	1	14	11.4	29	63	Fx017M	protected	TRUE	NA	IGHV3-33	IGHD3-22	IGHJ4	IGLV1-40	IGLJ3	IGHV3-33/15/IGLV1-40/13/0	clonally expanded
AB-000312	indeterminate	NA	NA			11	4	1.1	26	29	Fx017M	protected	TRUE	NA	IGHV3-21	IGHD6-13	IGHJ6	IGLV3-1	IGLJ3	IGHV3-21/17/IGLV3-1/10/0	clonally expanded
AB-000313	not reactive	NA	NA			8	8	2.6	6	51	Fx017M	protected	TRUE	NA	IGHV3-33	IGHD3-22	IGHJ3	IGKV1-5	IGKJ1	IGHV3-33/17/IGKV1-5/9/0	clonally expanded
AB-000314	reactive	NANP6	negative	97	300µg	1	21	6.5	19	5	Fx017M	protected	TRUE	TRUE	IGHV3-33	IGHD3-22	IGHJ4	IGKV1-5	IGKJ1	IGHV3-33/18/IGKV1-5/9/1	clonally expanded
AB-000315	reactive	NANP6	negative	92.7	100µg	3	8	6.5	22	63	Fx017M	protected	TRUE	NA	IGHV3-33	IGHD3-22	IGHJ4	IGKV1-5	IGKJ1	IGHV3-33/19/IGKV1-5/9/0	clonally expanded
AB-000316	not reactive	NA	NA			13	5	1.2	28	8	Fx017M	protected	FALSE	NA	IGHV3-33	IGHD3-9	IGHJ3	IGKV1-5	IGKJ1	IGHV3-33/20/IGKV1-5/9/0	clonally expanded
AB-000317	reactive	NANP6	NA	99.7	300µg	1	58	15.8	31	29	Fx017M	protected	TRUE	NA	IGHV3-30	IGHD6-19	IGHJ4	IGKV1-5	IGKJ1	IGHV3-30/13/IGKV1-5/10/0	clonally expanded
AB-000318	not reactive	NA	reactive			1	36	12.4	50	46	Fx017M	protected	FALSE	TRUE	IGHV3-23	IGHD6-19	IGHJ6	IGLV3-19	IGLJ2	IGHV3-23/22/IGLV3-19/12/0	clonally expanded
AB-000319	not reactive	NA	reactive			1	11	29.7	28	16	Fx017M	protected	FALSE	TRUE	IGHV4-34	IGHD6-19	IGHJ4	IGKV3-20	IGKJ1	IGHV4-34/22/IGKV3-20/10/0	clonally expanded
AB-000320	reactive	NANP6	negative	75.6	300µg	1	25	14.1	33	221	012M	protected	FALSE	NA	IGHV3-33	IGHD3-10	IGHJ4	IGKV1-33	IGKJ3	IGHV3-33/15/IGKV1-33/9/0	clonally expanded
AB-000321	not reactive	NA	negative			2	34	10.3	53	203	012M	protected	TRUE	TRUE	IGHV3-23	IGHD2-8	IGHJ4	IGKV2-30	IGKJ1	IGHV3-23/10/IGKV2-30/10/0	clonally expanded
AB-000322	not reactive	NA	NA			1	30	12.5	34	6	Fx017M	protected	FALSE	NA	IGHV3-7	IGHD6-19	IGHJ4	IGLV7-43	IGLJ3	IGHV3-7/14/IGLV7-43/10/0	clonally expanded
AB-000323	not reactive	NA	reactive			2	32	8.7	56	29	Fx017M	protected	TRUE	NA	IGHV1-69	IGHD3-16	IGHJ4	IGKV4-1	IGKJ1	IGHV1-69/19/IGKV4-1/10/0	clonally expanded
AB-000324	not reactive	NA	NA			1	7	10.9	28	205	012M	protected	TRUE	TRUE	IGHV3-33	IGHD6-13	IGHJ4	IGLV3-21	IGLJ2	IGHV3-33/15/IGLV3-21/12/1	clonally expanded
AB-000325	reactive	NANP6	negative	90.2	100µg	4	35	7.1	35	39	Fx017M	protected	TRUE	NA	IGHV3-33	IGHD3-22	IGHJ4	IGKV3-15	IGKJ2	IGHV3-33/15/IGKV3-15/9/0	clonally expanded
AB-000326	not reactive	NA	negative			2	7	18.9	27	16	Fx017M	protected	FALSE	TRUE	IGHV4-4	IGHD2-2	IGHJ3	IGKV2-28	IGKJ2	IGHV4-4/15/IGKV2-28/10/0	clonally expanded
AB-000327	reactive	NANP6	negative	98.9	300µg	2	10	8.1	40	63	Fx017M	protected	TRUE	NA	IGHV3-33	IGHD6-19	IGHJ4	IGLV1-40	IGLJ1	IGHV3-33/20/IGLV1-40/13/0	clonally expanded
AB-000328	not reactive	NA	negative			1	8	17	49	201	012M	protected	FALSE	NA	IGHV5-51	IGHD1-26	IGHJ5	IGKV4-1	IGKJ5	IGHV5-51/16/IGKV4-1/9/0	clonally expanded
AB-000329	not reactive	NA	reactive			1	29	9.4	39	51	Fx017M	protected	FALSE	NA	IGHV4-61	IGHD4-4	IGHJ2	IGKV3-11	IGKJ2	IGHV4-61/19/IGKV3-11/12/0	clonally expanded
AB-000330	not reactive	NA	NA			1	22	10.4	73	207	012M	protected	FALSE	FALSE	IGHV1-69	IGHD1-26	IGHJ6	IGLV7-43	IGLJ2	IGHV1-69/22/IGLV7-43/10/0	clonally expanded
AB-000331	not reactive	NA	NA			3	6	16.2	40	16	Fx017M	protected	FALSE	TRUE	IGHV3-7	IGHD3-16	IGHJ4	IGLV1-44	IGLJ3	IGHV3-7/17/IGLV1-44/12/0	clonally expanded
AB-000332	reactive	indeterminate	negative			3	20	6.9	30	46	Fx017M	protected	TRUE	TRUE	IGHV3-30	IGHD6-19	IGHJ4	IGKV2-30	IGKJ4	IGHV3-30/14/IGKV2-30/10/0	clonally expanded
AB-000333	not reactive	NA	NA			2	23	6.2	49	233	012M	protected	TRUE	TRUE	IGHV3-33	IGHD5-12	IGHJ4	IGKV1-39	IGKJ4	IGHV3-33/15/IGKV1-39/11/0	clonally expanded
AB-000334	reactive	NANP6	NA	99.7	300µg	4	20	5.5	27	14	Fx017M	protected	TRUE	TRUE	IGHV3-33	IGHD6-13	IGHJ3	IGKV1-5	IGKJ1	IGHV3-33/17/IGKV1-5/11/0	clonally expanded
AB-000335	reactive	C-terminal (Pf16)	NA	0	300µg	5	26	5.3	40	39	Fx017M	protected	FALSE	NA	IGHV3-21	IGHD4-17	IGHJ4	IGLV3-21	IGLJ3	IGHV3-21/17/IGLV3-21/12/0	clonally expanded
AB-000336	not reactive	NA	reactive			1	26	10.4	46	41	Fx017M	protected	FALSE	FALSE	IGHV4-4	IGHD1-7	IGHJ4	IGKV1-39	IGKJ3	IGHV4-4/15/IGKV1-39/18/0	clonally expanded
AB-000337	reactive	NANP6	NA	91.2	100µg	4	7	5.7	28	63	Fx017M	protected	TRUE	NA	IGHV3-33	IGHD3-22	IGHJ3	IGKV3-15	IGKJ1	IGHV3-33/18/IGKV3-15/9/0	clonally expanded
AB-000338	reactive	NANP6	NA	100	300µg	3	13	5.7	27	22	Fx017M	protected	TRUE	NA	IGHV3-33	IGHD3-22	IGHJ1	IGKV2-30	IGKJ1	IGHV3-33/16/IGKV2-30/9/0	clonally expanded
AB-000339	not reactive	NA	negative			3	20	6.5	40	51	Fx017M	protected	FALSE	NA	IGHV3-72	IGHD3-10	IGHJ6	IGLV1-44	IGLJ2	IGHV3-72/14/IGLV1-44/12/0	clonally expanded
AB-000340	not reactive	NA	reactive			4	18	4.5	37	8	Fx017M	protected	FALSE	NA	IGHV4-39	IGHD6-13	IGHJ4	IGLV1-40	IGLJ2	IGHV4-39/19/IGLV1-40/12/0	clonally expanded
AB-000341	not reactive	NA	indeterminate			2	5	10.6	35	201	012M	protected	FALSE	NA	IGHV4-39	IGHD6-19	IGHJ6	IGLV3-9	IGLJ2	IGHV4-39/19/IGLV3-9/10/0	clonally expanded
AB-000342	not reactive	NA	negative			3	18	5.6	45	5	Fx017M	protected	FALSE	FALSE	IGHV4-59	IGHD5-12	IGHJ3	IGLV1-44	IGLJ3	IGHV4-59/16/IGLV1-44/12/0	clonally expanded
AB-000343	not reactive	NA	NA			1	18	5.4	29	60	Fx017M	protected	FALSE	NA	IGHV3-23	IGHD6-19	IGHJ4	IGLV2-14	IGLJ2	IGHV3-23/22/IGLV2-14/11/0	clonally expanded
AB-000344	not reactive	NA	NA			4	13	3.6	53	53	Fx017M	protected	FALSE	TRUE	IGHV3-33	IGHD4-17	IGHJ4	IGKV1-39	IGKJ5	IGHV3-33/14/IGKV1-39/11/0	clonally expanded
AB-000345	not reactive	NA	reactive			3	15	4.2	61	53	Fx017M	protected	TRUE	TRUE	IGHV3-23	IGHD5-5	IGHJ4	IGKV3-15	IGKJ1	IGHV3-23/10/IGKV3-15/11/0	clonally expanded
AB-000346	not reactive	NA	negative			4	18	4.5	67	8	Fx017M	protected	FALSE	NA	IGHV1-46	IGHD3-16	IGHJ4	IGLV2-18	IGLJ1	IGHV1-46/13/IGLV2-18/11/0	clonally expanded
AB-000347	not reactive	NA	NA			8	3	1.8	53	7	Fx017M	protected	FALSE	TRUE	IGHV3-23	IGHD5-5	IGHJ6	IGLV3-21	IGLJ3	IGHV3-23/17/IGLV3-21/12/1	clonally expanded
AB-000348	not reactive	NA	negative			6	14	3.8	118	14	Fx017M	protected	FALSE	FALSE	IGHV4-39	IGHD6-13	IGHJ4	IGKV1-39	IGKJ4	IGHV4-39/10/IGKV1-39/10/0	clonally expanded
AB-000349	reactive	NANP6	negative	96.8	100µg	8	19	3.9	31	39	Fx017M	protected	TRUE	NA	IGHV3-7	IGHD3-3	IGHJ5	IGKV2D-29	IGKJ4	IGHV3-7/7/IGKV2D-29/10/0	clonally expanded
AB-000350	indeterminate	NA	NA			4	12	5.2	31	22	Fx017M	protected	FALSE	NA	IGHV3-30	IGHD3-16	IGHJ4	IGKV2-28	IGKJ2	IGHV3-30/19/IGKV2-28/9/0	clonally expanded
AB-000351	not reactive	NA	NA			3	9	5.3	38	7	Fx017M	protected	FALSE	FALSE	IGHV1-18	IGHD3-3	IGHJ3	IGKV1-5	IGKJ2	IGHV1-18/17/IGKV1-5/12/0	clonally expanded
AB-000352	reactive	C-terminal (Pf16)	NA	27.8	100µg	4	12	4.8	33	41	Fx017M	protected	FALSE	FALSE	IGHV3-21	IGHD6-19	IGHJ4	IGLV3-21	IGLJ3	IGHV3-21/14/IGLV3-21/11/1	clonally expanded
AB-000353	not reactive	NA	reactive			4	13	3.5	33	233	012M	protected	FALSE	FALSE	IGHV1-18	IGHD2-15	IGHJ4	IGKV1-39	IGKJ2	IGHV1-18/21/IGKV1-39/11/0	clonally expanded
AB-000354	not reactive	NA	negative			5	12	3.3	29	53	Fx017M	protected	TRUE	FALSE	IGHV3-30	IGHD3-9	IGHJ4	IGLV3-27	IGLJ3	IGHV3-30/8/IGLV3-27/11/0	clonally expanded
AB-000355	reactive	negative, peptide ELISAs	NA			1	9	5.7	51	52	Fx017M	protected	FALSE	NA	IGHV3-74	IGHD1-20	IGHJ4	IGLV2-14	IGLJ1	IGHV3-74/17/IGLV2-14/11/0	clonally expanded
AB-000356	reactive	NANP6	NA	96.9	100µg	2	6	3.8	35	52	Fx017M	protected	TRUE	NA	IGHV3-33	IGHD3-22	IGHJ4	IGKV3-15	IGKJ3	IGHV3-33/18/IGKV3-15/9/0	clonally expanded
AB-000357	not reactive	NA	negative			2	14	4.2	51	60	Fx017M	protected	FALSE	NA	IGHV1-69	IGHD5-12	IGHJ4	IGKV3-15	IGKJ4	IGHV1-69/17/IGKV3-15/11/0	clonally expanded
AB-000358	not reactive	NA	reactive			5	12	3.6	42	203	012M	protected	FALSE	TRUE	IGHV4-39	IGHD1-1	IGHJ3	IGKV3-20	IGKJ4	IGHV4-39/23/IGKV3-20/10/0	clonally expanded
AB-000359	not reactive	NA	NA			5	2	5.4	44	16	Fx017M	protected	FALSE	TRUE	IGHV3-49	IGHD5-12	IGHJ4	IGKV2-24	IGKJ1	IGHV3-49/18/IGKV2-24/10/0	clonally expanded
AB-000360	not reactive	NA	reactive			5	10	4.3	44	22	Fx017M	protected	FALSE	NA	IGHV3-49	IGHD6-19	IGHJ4	IGKV1-12	IGKJ3	IGHV3-49/19/IGKV1-12/10/0	clonally expanded
AB-000361	not reactive	NA	reactive			5	1	NA	31	205	012M	protected	FALSE	FALSE	IGHV3-23	IGHD3-16	IGHJ4	IGLV3-21	IGLJ2	IGHV3-23/17/IGLV3-21/12/0	1 PB
AB-000362	not reactive	NA	negative			2	4	6.3	35	205	012M	protected	FALSE	TRUE	IGHV3-21	IGHD3-10	IGHJ3	IGKV3-15	IGKJ2	IGHV3-21/23/IGKV3-15/10/0	clonally expanded
AB-000363	not reactive	NA	reactive			3	11	4.1	44	15	Fx017M	protected	FALSE	NA	IGHV1-18	IGHD7-27	IGHJ6	IGKV1-39	IGKJ2	IGHV1-18/16/IGKV1-39/10/0	clonally expanded
AB-000364	reactive	NANP6	negative	99.6	100µg	5	12	3.3	27	29	Fx017M	protected	FALSE	NA	IGHV3-33	IGHD1-1	IGHJ4	IGKV1-5	IGKJ1	IGHV3-33/13/IGKV1-5/9/0	clonally expanded
AB-000365	not reactive	NA	reactive			13	2	0.56	41	53	Fx017M	protected	FALSE	FALSE	IGHV4-39	IGHD6-19	IGHJ2	IGLV4-69	IGLJ7	IGHV4-39/19/IGLV4-69/10/0	clonally expanded
AB-000366	reactive	NANP6	NA	42.6	100µg	3	8	4.5	59	221	012M	protected	FALSE	NA	IGHV1-2	IGHD2-2	IGHJ3	IGKV1-39	IGKJ1	IGHV1-2/15/IGKV1-39/9/0	clonally expanded
AB-000367	reactive	C-terminal (Pf16)	negative	0	300µg	3	13	3.9	39	60	Fx017M	protected	TRUE	NA	IGHV3-21	IGHD3-10	IGHJ5	IGLV3-1	IGLJ3	IGHV3-21/18/IGLV3-1/11/0	clonally expanded
AB-000368	indeterminate	NA	NA			1	9	4.8	25	24	Fx017M	protected	FALSE	NA	IGHV3-23	IGHD3-3	IGHJ6	IGKV1-27	IGKJ2	IGHV3-23/23/IGKV1-27/10/0	clonally expanded
AB-000369	reactive	C-terminal (Pf16)	negative	0	100µg	9	14	2.8	29	39	Fx017M	protected	FALSE	NA	IGHV4-59	IGHD1-26	IGHJ6	IGLV1-40	IGLJ2	IGHV4-59/19/IGLV1-40/11/0	clonally expanded
AB-000370	not reactive	NA	negative			7	4	3.3	30	63	Fx017M	protected	TRUE	NA	IGHV1-2	IGHD2-15	IGHJ4	IGKV4-1	IGKJ1	IGHV1-2/14/IGKV4-1/9/0	clonally expanded
AB-000371	not reactive	NA	reactive			6	11	3	47	233	012M	protected	TRUE	FALSE	IGHV3-48	IGHD1-1	IGHJ2	IGKV3-15	IGKJ4	IGHV3-48/16/IGKV3-15/10/0	clonally expanded
AB-000372	not reactive	NA	negative			6	11	3	50	233	012M	protected	TRUE	FALSE	IGHV6-1	IGHD7-27	IGHJ4	IGKV2-28	IGKJ4	IGHV6-1/13/IGKV2-28/10/0	clonally expanded
AB-000373	reactive	NANP6	negative	95.1	100µg	3	14	3.6	27	34	Fx017M	protected	FALSE	TRUE	IGHV3-33	IGHD6-19	IGHJ4	IGKV2-29	IGKJ1	IGHV3-33/14/IGKV2-29/9/0	clonally expanded
AB-000374	not reactive	NA	negative			1	13	3.6	46	3	Fx017M	protected	FALSE	FALSE	IGHV3-20	IGHD6-19	IGHJ4	IGLV2-8	IGLJ3	IGHV3-20/15/IGLV2-8/11/0	clonally expanded
AB-000375	not reactive	NA	reactive			4	12	3.6	68	60	Fx017M	protected	FALSE	NA	IGHV1-3	IGHD3-3	IGHJ4	IGKV1-5	IGKJ4	IGHV1-3/17/IGKV1-5/11/0	clonally expanded
AB-000376	reactive	NANP6	NA	94.7	300µg	11	4	1.2	33	60	Fx017M	protected	TRUE	NA	IGHV3-33	IGHD3-10	IGHJ4	IGKV1-5	IGKJ1	IGHV3-33/16/IGKV1-5/9/1	clonally expanded
AB-000377	not reactive	NA	NA			7	9	2.5	37	14	Fx017M	protected	TRUE	TRUE	IGHV4-39	IGHD6-19	IGHJ6	IGLV1-40	IGLJ2	IGHV4-39/21/IGLV1-40/12/0	clonally expanded
AB-000378	not reactive	NA	NA			6	9	3.9	57	22	Fx017M	protected	FALSE	NA	IGHV3-48	IGHD4-4	IGHJ4	IGKV1-5	IGKJ4	IGHV3-48/17/IGKV1-5/10/0	clonally expanded
AB-000379	not reactive	NA	negative			1	13	4	43	40	Fx017M	protected	FALSE	NA	IGHV1-3	IGHD3-16	IGHJ4	IGKV3-11	IGKJ2	IGHV1-3/15/IGKV3-11/11/0	clonally expanded
AB-000380	not reactive	NA	negative			6	11	3.3	70	203	012M	protected	FALSE	TRUE	IGHV3-15	IGHD4-4	IGHJ6	IGLV5-39	IGLJ3	IGHV3-15/21/IGLV5-39/12/0	clonally expanded
AB-000381	not reactive	NA	NA			6	11	3.3	30	203	012M	protected	FALSE	TRUE	IGHV1-69-2	IGHD5-12	IGHJ4	IGKV4-1	IGKJ4	IGHV1-69-2/14/IGKV4-1/10/0	clonally expanded
AB-000382	not reactive	NA	NA			4	7	4.1	27	7	Fx017M	protected	FALSE	FALSE	IGHV3-33	IGHD3-10	IGHJ6	IGKV3-20	IGKJ2	IGHV3-33/23/IGKV3-20/11/0	clonally expanded
AB-000383	not reactive	NA	reactive			4	7	4.1	50	7	Fx017M	protected	FALSE	TRUE	IGHV3-23	IGHD6-19	IGHJ4	IGKV1-39	IGKJ1	IGHV3-23/22/IGKV1-39/10/0	clonally expanded
AB-000384	not reactive	NA	negative			3	7	3.7	33	24	Fx017M	protected	TRUE	NA	IGHV3-30	IGHD1-7	IGHJ4	IGLV3-25	IGLJ2	IGHV3-30/13/IGLV3-25/12/0	clonally expanded
AB-000385	not reactive	NA	reactive			1	9	4.8	34	24	Fx017M	protected	FALSE	NA	IGHV4-39	IGHD6-19	IGHJ2	IGKV1-9	IGKJ3	IGHV4-39/19/IGKV1-9/11/0	clonally expanded
AB-000386	reactive	C-terminal (Pf16)	negative	0	100µg	6	11	3.6	30	51	Fx017M	protected	FALSE	NA	IGHV3-21	IGHD6-13	IGHJ6	IGLV1-40	IGLJ2	IGHV3-21/17/IGLV1-40/11/0	clonally expanded
AB-000387	not reactive	NA	reactive			4	7	4	36	221	012M	protected	FALSE	NA	IGHV1-2	IGHD5-5	IGHJ3	IGLV2-8	IGLJ3	IGHV1-2/16/IGLV2-8/11/0	clonally expanded
AB-000388	not reactive	NA	negative			6	10	3.2	39	229	012M	protected	FALSE	NA	IGHV1-18	IGHD2-2	IGHJ4	IGLV1-51	IGLJ3	IGHV1-18/11/IGLV1-51/13/0	clonally expanded
AB-000389	reactive	C-terminal (Pf16)	negative	8.8	300µg	4	13	3.3	37	34	Fx017M	protected	FALSE	TRUE	IGHV3-48	IGHD3-22	IGHJ4	IGKV1-5	IGKJ2	IGHV3-48/18/IGKV1-5/11/0	clonally expanded
AB-000390	reactive	indeterminate	negative			2	12	3.3	35	3	Fx017M	protected	FALSE	TRUE	IGHV3-23	IGHD2-2	IGHJ6	IGKV1-5	IGKJ1	IGHV3-23/19/IGKV1-5/9/0	clonally expanded
AB-000391	reactive	NANP6	negative	99.9	300µg	3	7	4.3	38	38	Fx017M	protected	FALSE	NA	IGHV3-48	IGHD6-6	IGHJ6	IGKV2-30	IGKJ2	IGHV3-48/16/IGKV2-30/10/0	clonally expanded
AB-000392	not reactive	NA	negative			8	5	2	27	26	Fx017M	protected	FALSE	NA	IGHV3-30	IGHD5-5	IGHJ4	IGLV3-27	IGLJ3	IGHV3-30/13/IGLV3-27/11/0	clonally expanded
AB-000393	reactive	NANP6	NA	38.5	100µg	3	8	3.3	25	6	Fx017M	protected	FALSE	NA	IGHV3-49	IGHD3-10	IGHJ6	IGKV2D-29	IGKJ2	IGHV3-49/14/IGKV2D-29/10/0	clonally expanded
AB-000394	reactive	NANP6	negative	94.5	100µg	7	9	2.5	30	14	Fx017M	protected	TRUE	TRUE	IGHV3-33	IGHD6-13	IGHJ4	IGKV3-11	IGKJ3	IGHV3-33/16/IGKV3-11/9/0	clonally expanded
AB-000395	reactive	NANP6	indeterminate	0	100µg	11	4	1.1	19	14	Fx017M	protected	FALSE	TRUE	IGHV3-33	IGHD3-9	IGHJ4	IGKV1-5	IGKJ1	IGHV3-33/16/IGKV1-5/9/0	clonally expanded
AB-000396	not reactive	NA	reactive			7	8	3.5	38	22	Fx017M	protected	TRUE	NA	IGHV4-39	IGHD3-9	IGHJ3	IGKV3-20	IGKJ3	IGHV4-39/23/IGKV3-20/10/0	clonally expanded
AB-000397	reactive	NANP6	NA	99.9	300µg	6	8	2.7	27	46	Fx017M	protected	FALSE	TRUE	IGHV3-15	IGHD4-4	IGHJ4	IGKV2-28	IGKJ2	IGHV3-15/13/IGKV2-28/10/0	clonally expanded
AB-000398	not reactive	NA	negative			2	8	4.3	33	24	Fx017M	protected	FALSE	NA	IGHV3-23	IGHD3-22	IGHJ4	IGLV3-10	IGLJ1	IGHV3-23/16/IGLV3-10/14/0	clonally expanded
AB-000399	reactive	NANP6	negative	98.9	100µg	5	10	3.1	28	5	Fx017M	protected	TRUE	TRUE	IGHV3-49	IGHD6-13	IGHJ4	IGKV2D-29	IGKJ1	IGHV3-49/13/IGKV2D-29/10/0	clonally expanded
AB-000400	not reactive	NA	negative			5	6	3.6	46	7	Fx017M	protected	FALSE	TRUE	IGHV4-4	IGHD3-10	IGHJ5	IGLV1-40	IGLJ3	IGHV4-4/14/IGLV1-40/12/0	clonally expanded
AB-001387	reactive	NANP6	NA	98	300µg	4	7	3.2	5	236	012M	protected	TRUE	NA	IGHV3-33	IGHD4-17	IGHJ4	IGLV1-40	IGLJ3	IGHV3-33/18/IGLV1-40/12/0	>1 PB, monoclonal
AB-001388	reactive	NANP6	NA	93	300µg	2	30	11.7	18	230	012M	not protected	FALSE	TRUE	IGHV3-33	IGHD3-10	IGHJ4	IGKV3-20	IGKJ1	IGHV3-33/12/IGKV3-20/9/0	clonally expanded
AB-001389	not reactive	NA	NA			7	4	1.9	30	236	012M	protected	FALSE	NA	IGHV4-39	IGHD6-19	IGHJ4	IGLV1-51	IGLJ2	IGHV4-39/19/IGLV1-51/12/0	clonally expanded
AB-001390	reactive	NANP6	NA			4	13	3.9	2	203	012M	protected	FALSE	TRUE	IGHV3-33	IGHD4-17	IGHJ3	IGKV2-28	IGKJ2	IGHV3-33/18/IGKV2-28/9/0	clonally expanded
AB-001391	not reactive	NA	NA			1	18	12.6	9	209	012M	protected	FALSE	NA	IGHV1-18	IGHD6-19	IGHJ2	IGLV6-57	IGLJ2	IGHV1-18/21/IGLV6-57/10/0	clonally expanded
AB-001392	reactive	C-terminal (Pf16)	NA			3	15	3.5	44	25	Fx017M	not protected	FALSE	FALSE	IGHV4-59	IGHD3-16	IGHJ4	IGKV1-33	IGKJ4	IGHV4-59/22/IGKV1-33/9/0	clonally expanded
AB-001393	reactive	C-terminal (Pf16)	NA			4	3	3.5	19	54	Fx017M	not protected	FALSE	TRUE	IGHV3-23	IGHD4-4	IGHJ6	IGKV1-33	IGKJ4	IGHV3-23/17/IGKV1-33/10/0	clonally expanded
AB-001394	not reactive	NA	NA			8	6	3	28	208	012M	not protected	FALSE	NA	IGHV2-26	IGHD3-10	IGHJ6	IGLV2-23	IGLJ3	IGHV2-26/22/IGLV2-23/11/0	clonally expanded
AB-001395	reactive	NANP6	NA	99	300µg	6	8	3.1	27	202	012M	not protected	TRUE	TRUE	IGHV3-33	IGHD2-2	IGHJ4	IGLV6-57	IGLJ3	IGHV3-33/17/IGLV6-57/7/0	clonally expanded
AB-001396	reactive	NANP6	NA	100	300µg	3	23	7.3	10	229	012M	protected	FALSE	NA	IGHV3-33	IGHD3-22	IGHJ3	IGKV1-5	IGKJ1	IGHV3-33/21/IGKV1-5/9/0	clonally expanded
AB-001397	not reactive	NA	NA			5	9	4.5	44	208	012M	not protected	FALSE	NA	IGHV3-53	IGHD6-13	IGHJ4	IGLV2-14	IGLJ1	IGHV3-53/13/IGLV2-14/12/0	clonally expanded
AB-001398	indeterminate	NA	NA			8	3	1.7	41	216	012M	protected	FALSE	NA	IGHV3-23	IGHD3-22	IGHJ4	IGKV1-33	IGKJ5	IGHV3-23/16/IGKV1-33/10/0	clonally expanded
AB-001399	reactive	indeterminate	NA			4	12	4.6	14	202	012M	not protected	FALSE	TRUE	IGHV4-31	IGHD2-2	IGHJ6	IGKV1-5	IGKJ2	IGHV4-31/24/IGKV1-5/11/0	clonally expanded
AB-001400	indeterminate	NA	NA			7	9	2.4	22	233	012M	protected	TRUE	TRUE	IGHV1-69	IGHD2-15	IGHJ6	IGKV1-16	IGKJ5	IGHV1-69/18/IGKV1-16/10/0	clonally expanded
AB-001401	not reactive	NA	NA			7	9	3.6	27	234	012M	not protected	TRUE	NA	IGHV1-69	IGHD3-22	IGHJ6	IGKV1-16	IGKJ2	IGHV1-69/18/IGKV1-16/10/0	clonally expanded
AB-001402	reactive	NT	NA			8	3	1.7	57	216	012M	protected	FALSE	NA	IGHV1-69	IGHD1-1	IGHJ2	IGLV3-25	IGLJ2	IGHV1-69/17/IGLV3-25/13/0	>1 PB, monoclonal
AB-001403	reactive	NANP6	NA			4	7	3.9	8	216	012M	protected	FALSE	NA	IGHV3-30	IGHD3-22	IGHJ4	IGLV1-40	IGLJ2	IGHV3-30/18/IGLV1-40/12/1	clonally expanded
AB-001404	reactive	NT	NA			7	3	1.4	1	207	012M	protected	TRUE	TRUE	IGHV3-33	IGHD3-22	IGHJ4	IGKV1-5	IGKJ1	IGHV3-33/19/IGKV1-5/9/2	clonally expanded
AB-001405	reactive	NANP6	NA			2	8	9.4	16	54	Fx017M	not protected	TRUE	TRUE	IGHV3-33	IGHD6-13	IGHJ5	IGKV2D-29	IGKJ1	IGHV3-33/15/IGKV2D-29/9/0	clonally expanded
AB-001406	not reactive	NA	NA			6	10	3.2	8	229	012M	protected	FALSE	NA	IGHV3-23	IGHD6-19	IGHJ4	IGKV3-11	IGKJ3	IGHV3-23/22/IGKV3-11/10/0	clonally expanded
AB-001407	reactive	NT	NA			3	7	4.1	35	228	012M	not protected	FALSE	TRUE	IGHV3-30	IGHD6-13	IGHJ3	IGKV3-15	IGKJ2	IGHV3-30/19/IGKV3-15/9/0	clonally expanded
AB-001408	indeterminate	NA	NA			3	3	4.7	2	205	012M	protected	FALSE	FALSE	IGHV4-38-2	IGHD5-5	IGHJ5	IGKV3-15	IGKJ3	IGHV4-38-2/19/IGKV3-15/12/0	>1 PB, monoclonal
AB-001409	reactive	NANP6	NA			1	52	12.2	18	25	Fx017M	not protected	TRUE	FALSE	IGHV3-33	IGHD3-22	IGHJ4	IGKV1-5	IGKJ1	IGHV3-33/19/IGKV1-5/9/0	clonally expanded
AB-001410	reactive	NANP6	NA			7	5	1.7	23	23	Fx017M	not protected	FALSE	NA	IGHV3-33	IGHD3-10	IGHJ4	IGKV1-5	IGKJ1	IGHV3-33/17/IGKV1-5/9/0	clonally expanded
AB-001411	reactive	NANP6	NA			1	37	14.4	3	230	012M	not protected	FALSE	TRUE	IGHV3-33	IGHD6-19	IGHJ4	IGKV2-28	IGKJ1	IGHV3-33/17/IGKV2-28/9/0	clonally expanded
AB-001412	not reactive	NA	NA			6	3	1.7	21	228	012M	not protected	FALSE	TRUE	IGHV4-39	IGHD6-13	IGHJ4	IGLV2-14	IGLJ2	IGHV4-39/20/IGLV2-14/12/0	clonally expanded
AB-001413	reactive	NANP6	NA			4	13	3.9	9	203	012M	protected	FALSE	TRUE	IGHV3-33	IGHD2-15	IGHJ3	IGKV1-5	IGKJ2	IGHV3-33/18/IGKV1-5/9/0	clonally expanded
AB-001414	not reactive	NA	NA			3	3	4.7	36	205	012M	protected	FALSE	TRUE	IGHV1-18	IGHD6-19	IGHJ3	IGLV2-23	IGLJ2	IGHV1-18/22/IGLV2-23/12/0	clonally expanded
AB-001415	reactive	NT	NA			3	7	4.1	26	228	012M	not protected	FALSE	TRUE	IGHV3-21	IGHD2-15	IGHJ4	IGLV3-21	IGLJ2	IGHV3-21/17/IGLV3-21/13/0	clonally expanded
AB-001416	not reactive	NA	NA			15	3	0.82	35	49	Fx017M	not protected	FALSE	NA	IGHV3-7	IGHD7-27	IGHJ4	IGLV3-1	IGLJ3	IGHV3-7/11/IGLV3-1/10/0	clonally expanded
AB-001417	not reactive	NA	NA			3	8	5.6	8	209	012M	protected	FALSE	NA	IGHV3-48	IGHD2-21	IGHJ4	IGLV1-40	IGLJ1	IGHV3-48/14/IGLV1-40/10/0	clonally expanded
AB-001418	not reactive	NA	NA			7	4	1.9	35	236	012M	protected	FALSE	NA	IGHV1-8	IGHD6-19	IGHJ5	IGLV1-44	IGLJ2	IGHV1-8/18/IGLV1-44/11/0	clonally expanded
AB-001419	not reactive	NA	NA			3	8	5.6	7	209	012M	protected	FALSE	NA	IGHV3-30	IGHD3-10	IGHJ6	IGLV3-19	IGLJ1	IGHV3-30/29/IGLV3-19/12/0	clonally expanded
AB-001420	not reactive	NA	NA			3	14	4.2	27	203	012M	protected	FALSE	TRUE	IGHV1-18	IGHD6-19	IGHJ6	IGKV3-20	IGKJ1	IGHV1-18/21/IGKV3-20/10/0	clonally expanded
AB-001421	reactive	NANP6	NA	100	300µg	3	15	3.5	40	25	Fx017M	not protected	FALSE	FALSE	IGHV3-15	IGHD3-10	IGHJ5	IGKV2-28	IGKJ1	IGHV3-15/14/IGKV2-28/10/0	clonally expanded
AB-001422	not reactive	NA	NA			6	8	3.1	42	230	012M	not protected	FALSE	FALSE	IGHV3-21	IGHD3-10	IGHJ4	IGLV2-14	IGLJ1	IGHV3-21/21/IGLV2-14/11/0	clonally expanded
AB-001423	not reactive	NA	NA			4	22	6	34	49	Fx017M	not protected	FALSE	NA	IGHV4-39	IGHD2-8	IGHJ3	IGKV3-11	IGKJ1	IGHV4-39/19/IGKV3-11/12/0	clonally expanded
AB-001424	not reactive	NA	NA			4	3	3.5	45	54	Fx017M	not protected	TRUE	TRUE	IGHV3-48	IGHD3-10	IGHJ4	IGKV3-15	IGKJ4	IGHV3-48/16/IGKV3-15/10/0	clonally expanded
AB-001425	reactive	NT	NA			3	8	3.7	6	236	012M	protected	FALSE	NA	IGHV3-30	IGHD2-8	IGHJ6	IGKV4-1	IGKJ5	IGHV3-30/27/IGKV4-1/10/0	clonally expanded
AB-001426	not reactive	NA	NA			6	5	2.3	2	236	012M	protected	FALSE	NA	IGHV3-33	IGHD3-10	IGHJ3	IGKV1-5	IGKJ2	IGHV3-33/17/IGKV1-5/9/0	>1 PB, monoclonal
AB-001427	not reactive	NA	NA			3	3	4.7	4	205	012M	protected	FALSE	TRUE	IGHV3-48	IGHD7-27	IGHJ3	IGKV1-39	IGKJ1	IGHV3-48/13/IGKV1-39/10/0	clonally expanded
AB-001428	reactive	NANP6	NA	96	300µg	2	9	6.3	9	209	012M	protected	TRUE	NA	IGHV3-33	IGHD3-22	IGHJ3	IGKV1-5	IGKJ1	IGHV3-33/17/IGKV1-5/9/0	clonally expanded
AB-001429	reactive	NANP6	NA			2	12	5.7	7	207	012M	protected	FALSE	TRUE	IGHV3-33	IGHD4-17	IGHJ4	IGLV1-40	IGLJ1	IGHV3-33/18/IGLV1-40/13/0	clonally expanded
AB-001430	not reactive	NA	NA			5	6	3.4	2	216	012M	protected	FALSE	NA	IGHV3-33	IGHD3-16	IGHJ4	IGKV4-1	IGKJ1	IGHV3-33/16/IGKV4-1/9/0	clonally expanded
AB-001431	not reactive	NA	NA			9	7	2.2	46	229	012M	protected	FALSE	NA	IGHV3-7	IGHD3-22	IGHJ4	IGKV1-33	IGKJ1	IGHV3-7/21/IGKV1-33/9/0	clonally expanded
AB-001432	not reactive	NA	NA			2	16	6.1	8	202	012M	not protected	FALSE	FALSE	IGHV1-18	IGHD3-10	IGHJ5	IGKV3-11	IGKJ5	IGHV1-18/23/IGKV3-11/10/0	clonally expanded
AB-001433	not reactive	NA	NA			2	14	6.9	48	208	012M	not protected	FALSE	NA	IGHV4-34	IGHD3-22	IGHJ4	IGLV3-19	IGLJ2	IGHV4-34/24/IGLV3-19/11/0	clonally expanded
AB-001434	indeterminate	NA	NA			7	9	2.7	3	203	012M	protected	FALSE	TRUE	IGHV3-33	IGHD6-19	IGHJ4	IGKV2-24	IGKJ1	IGHV3-33/14/IGKV2-24/9/0	clonally expanded
AB-001435	reactive	NT	NA			6	6	2	8	23	Fx017M	not protected	FALSE	NA	IGHV3-33	IGHD3-10	IGHJ3	IGKV1-5	IGKJ3	IGHV3-33/18/IGKV1-5/9/0	clonally expanded
AB-001436	not reactive	NA	NA			3	8	4.5	0	216	012M	protected	FALSE	NA	IGHV3-33	IGHD3-9	IGHJ3	IGKV4-1	IGKJ1	IGHV3-33/20/IGKV4-1/9/0	clonally expanded
AB-001437	reactive	C-terminal (Pf16)	NA			13	5	1.4	32	49	Fx017M	not protected	TRUE	NA	IGHV3-23	IGHD4-17	IGHJ4	IGLV1-51	IGLJ3	IGHV3-23/16/IGLV1-51/12/0	clonally expanded
AB-001438	reactive	NANP6	NA	100	300µg	10	6	1.4	30	25	Fx017M	not protected	TRUE	FALSE	IGHV3-33	IGHD2-15	IGHJ4	IGLV1-40	IGLJ2	IGHV3-33/20/IGLV1-40/12/0	clonally expanded
AB-001439	reactive	NANP6	NA			3	9	3	12	23	Fx017M	not protected	TRUE	NA	IGHV3-33	IGHD3-22	IGHJ4	IGLV1-40	IGLJ1	IGHV3-33/18/IGLV1-40/12/0	clonally expanded
AB-001440	indeterminate	NA	NA			1	9	10.6	1	54	Fx017M	not protected	FALSE	TRUE	IGHV3-23	IGHD3-3	IGHJ4	IGLV9-49	IGLJ3	IGHV3-23/19/IGLV9-49/14/0	clonally expanded
AB-001441	reactive	NT	NA			9	7	2.1	16	203	012M	protected	FALSE	FALSE	IGHV4-4	IGHD4-4	IGHJ5	IGKV3-20	IGKJ2	IGHV4-4/15/IGKV3-20/10/0	clonally expanded
AB-001442	not reactive	NA	NA			5	10	3.9	33	230	012M	not protected	FALSE	FALSE	IGHV4-4	IGHD2-2	IGHJ4	IGKV3-11	IGKJ2	IGHV4-4/19/IGKV3-11/11/0	clonally expanded
AB-001443	reactive	NANP6	NA	100	300µg	7	7	3.5	9	208	012M	not protected	FALSE	NA	IGHV3-33	IGHD3-22	IGHJ3	IGKV1-5	IGKJ1	IGHV3-33/20/IGKV1-5/9/0	>1 PB, monoclonal
AB-001444	not reactive	NA	NA			7	6	2.3	38	230	012M	not protected	FALSE	FALSE	IGHV3-23	IGHD5-12	IGHJ4	IGLV2-8	IGLJ2	IGHV3-23/12/IGLV2-8/11/0	clonally expanded
AB-001445	not reactive	NA	NA			4	5	2.9	98	228	012M	not protected	FALSE	FALSE	IGHV4-38-2	IGHD2-21	IGHJ4	IGKV3-20	IGKJ3	IGHV4-38-2/15/IGKV3-20/11/0	clonally expanded
AB-001446	reactive	NANP6	NA	100	300µg	4	22	6	30	49	Fx017M	not protected	TRUE	NA	IGHV1-8	IGHD2-2	IGHJ5	IGLV9-49	IGLJ3	IGHV1-8/19/IGLV9-49/14/0	clonally expanded
AB-001447	not reactive	NA	NA			14	2	0.79	35	234	012M	not protected	FALSE	NA	IGHV4-39	IGHD6-19	IGHJ4	IGLV4-69	IGLJ2	IGHV4-39/19/IGLV4-69/11/0	clonally expanded
AB-001448	indeterminate	NA	NA			7	9	2.4	7	233	012M	protected	TRUE	FALSE	IGHV3-15	IGHD5-5	IGHJ4	IGLV3-1	IGLJ3	IGHV3-15/14/IGLV3-1/10/1	clonally expanded
AB-001449	reactive	NANP6	NA			1	33	10.5	23	229	012M	protected	FALSE	NA	IGHV3-15	IGHD6-6	IGHJ5	IGKV2-28	IGKJ4	IGHV3-15/12/IGKV2-28/10/0	clonally expanded
AB-001450	indeterminate	NA	NA			6	3	2.1	11	209	012M	protected	TRUE	NA	IGHV7-4-1	IGHD2-2	IGHJ3	IGKV4-1	IGKJ3	IGHV7-4-1/13/IGKV4-1/10/0	clonally expanded
AB-001451	indeterminate	NA	NA			7	5	1.7	75	23	Fx017M	not protected	FALSE	NA	IGHV3-15	IGHD3-10	IGHJ5	IGLV2-14	IGLJ2	IGHV3-15/10/IGLV2-14/9/0	clonally expanded
AB-001452	indeterminate	NA	NA			7	4	1.9	34	236	012M	protected	FALSE	NA	IGHV3-21	IGHD3-16	IGHJ4	IGKV1D-13	IGKJ5	IGHV3-21/22/IGKV1D-13/10/0	clonally expanded
AB-001453	not reactive	NA	NA			5	10	3.8	6	202	012M	not protected	FALSE	FALSE	IGHV3-74	IGHD3-22	IGHJ6	IGLV3-10	IGLJ3	IGHV3-74/23/IGLV3-10/11/0	clonally expanded
AB-001454	not reactive	NA	NA			5	5	2.4	44	207	012M	protected	FALSE	FALSE	IGHV1-18	IGHD1-26	IGHJ4	IGKV1-39	IGKJ4	IGHV1-18/11/IGKV1-39/10/0	clonally expanded
AB-001455	reactive	NANP6	NA	99	300µg	2	9	5	14	216	012M	protected	TRUE	NA	IGHV3-33	IGHD3-22	IGHJ4	IGKV2-30	IGKJ2	IGHV3-33/16/IGKV2-30/9/0	clonally expanded
AB-001456	not reactive	NA	NA			3	3	4.7	16	205	012M	protected	FALSE	TRUE	IGHV2-70D	IGHD3-22	IGHJ4	IGKV1-39	IGKJ1	IGHV2-70D/14/IGKV1-39/10/0	>1 PB, monoclonal
AB-001457	reactive	negative, peptide ELISAs	NA			2	12	5.7	14	207	012M	protected	TRUE	TRUE	IGHV3-21	IGHD3-10	IGHJ3	IGKV3-20	IGKJ5	IGHV3-21/18/IGKV3-20/9/0	clonally expanded
AB-001458	reactive	NANP6	NA	95	300µg	1	10	4.6	10	236	012M	protected	FALSE	NA	IGHV3-49	IGHD6-13	IGHJ4	IGKV3-15	IGKJ1	IGHV3-49/13/IGKV3-15/9/0	clonally expanded
AB-001459	reactive	NANP6	NA	100	300µg	9	7	1.6	28	25	Fx017M	not protected	TRUE	FALSE	IGHV3-33	IGHD3-10	IGHJ3	IGKV1-5	IGKJ1	IGHV3-33/17/IGKV1-5/9/0	clonally expanded
AB-001460	indeterminate	NA	NA			6	3	1.7	25	228	012M	not protected	FALSE	FALSE	IGHV3-7	IGHD4-4	IGHJ3	IGKV3-11	IGKJ4	IGHV3-7/15/IGKV3-11/10/0	>1 PB, monoclonal
AB-001461	not reactive	NA	NA			5	6	2.8	59	236	012M	protected	TRUE	NA	IGHV3-74	IGHD3-10	IGHJ4	IGLV2-14	IGLJ1	IGHV3-74/16/IGLV2-14/12/0	clonally expanded
AB-001462	reactive	NANP6	NA	86	300µg	3	4	4.7	5	54	Fx017M	not protected	FALSE	TRUE	IGHV3-33	IGHD2-15	IGHJ4	IGKV1-16	IGKJ1	IGHV3-33/21/IGKV1-16/10/0	clonally expanded
AB-001463	not reactive	NA	NA			3	24	6.5	29	49	Fx017M	not protected	FALSE	NA	IGHV3-11	IGHD6-19	IGHJ3	IGKV3-20	IGKJ2	IGHV3-11/22/IGKV3-20/9/0	clonally expanded
AB-001464	not reactive	NA	NA			8	5	1.9	46	230	012M	not protected	FALSE	FALSE	IGHV3-74	IGHD3-3	IGHJ4	IGKV1-5	IGKJ2	IGHV3-74/17/IGKV1-5/10/0	clonally expanded
AB-001465	reactive	NANP6	NA	79	300µg	3	18	7.1	6	234	012M	not protected	TRUE	NA	IGHV5-51	IGHD3-22	IGHJ4	IGKV2-30	IGKJ2	IGHV5-51/15/IGKV2-30/10/0	clonally expanded
AB-001466	not reactive	NA	NA			9	3	1	22	23	Fx017M	not protected	FALSE	NA	IGHV3-11	IGHD1-26	IGHJ2	IGKV3-15	IGKJ4	IGHV3-11/18/IGKV3-15/10/1	clonally expanded
AB-001467	reactive	NANP6	NA			2	5	10.6	4	201	012M	protected	TRUE	NA	IGHV3-33	IGHD4-17	IGHJ4	IGKV3-11	IGKJ1	IGHV3-33/17/IGKV3-11/9/0	clonally expanded
AB-001468	reactive	NANP6	NA	95	300µg	9	4	1.6	11	230	012M	not protected	TRUE	FALSE	IGHV3-33	IGHD3-22	IGHJ3	IGKV1-5	IGKJ1	IGHV3-33/18/IGKV1-5/9/0	>1 PB, monoclonal
AB-001469	reactive	negative, peptide ELISAs	NA			1	18	6.9	46	202	012M	not protected	FALSE	TRUE	IGHV4-59	IGHD3-16	IGHJ4	IGKV1-39	IGKJ2	IGHV4-59/15/IGKV1-39/10/0	clonally expanded
AB-001470	indeterminate	NA	NA			11	5	1.6	30	229	012M	protected	FALSE	NA	IGHV5-51	IGHD6-19	IGHJ4	IGKV1-39	IGKJ2	IGHV5-51/15/IGKV1-39/10/0	clonally expanded
AB-001471	reactive	NANP6	NA			1	31	8.4	25	49	Fx017M	not protected	FALSE	NA	IGHV3-30	IGHD4-4	IGHJ4	IGKV3-15	IGKJ2	IGHV3-30/19/IGKV3-15/9/0	clonally expanded
AB-001472	reactive	NANP6	NA	99	300µg	9	7	1.9	6	233	012M	protected	TRUE	TRUE	IGHV3-33	IGHD6-6	IGHJ3	IGKV1-5	IGKJ1	IGHV3-33/19/IGKV1-5/9/2	clonally expanded
AB-001473	not reactive	NA	NA			4	8	2.7	43	23	Fx017M	not protected	FALSE	NA	IGHV3-66	IGHD6-6	IGHJ3	IGKV3-20	IGKJ3	IGHV3-66/14/IGKV3-20/11/0	clonally expanded
AB-001474	reactive	NANP6	NA			5	17	4.6	18	49	Fx017M	not protected	FALSE	NA	IGHV1-2	IGHD6-13	IGHJ4	IGKV2-28	IGKJ5	IGHV1-2/13/IGKV2-28/10/0	clonally expanded
AB-001475	reactive	NANP6	NA	62	300µg	8	8	3.2	36	234	012M	not protected	FALSE	NA	IGHV1-69-2	IGHD2-21	IGHJ3	IGLV9-49	IGLJ1	IGHV1-69-2/20/IGLV9-49/14/0	clonally expanded
AB-001476	reactive	NANP6	NA			4	10	5	4	208	012M	not protected	TRUE	NA	IGHV1-8	IGHD2-2	IGHJ5	IGLV9-49	IGLJ3	IGHV1-8/19/IGLV9-49/14/0	clonally expanded
AB-001477	reactive	negative, peptide ELISAs	NA			3	13	5	12	202	012M	not protected	FALSE	TRUE	IGHV4-39	IGHD6-19	IGHJ4	IGKV1-33	IGKJ2	IGHV4-39/17/IGKV1-33/10/0	clonally expanded
AB-001478	reactive	NANP6	NA	99	300µg	2	31	7.3	30	25	Fx017M	not protected	FALSE	FALSE	IGHV3-33	IGHD6-25	IGHJ4	IGKV3-11	IGKJ3	IGHV3-33/18/IGKV3-11/9/0	clonally expanded
AB-001479	indeterminate	NA	NA			3	4	4.7	65	54	Fx017M	not protected	FALSE	FALSE	IGHV3-23	IGHD6-19	IGHJ4	IGLV6-57	IGLJ3	IGHV3-23/17/IGLV6-57/10/0	clonally expanded
AB-001480	reactive	NANP6	NA	96	300µg	5	1	NA	15	201	012M	protected	TRUE	NA	IGHV3-33	IGHD4-17	IGHJ3	IGKV1-5	IGKJ1	IGHV3-33/17/IGKV1-5/9/1	1 PB
AB-001481	reactive	NANP6	NA			2	9	4.2	4	236	012M	protected	TRUE	NA	IGHV3-33	IGHD4-17	IGHJ6	IGKV2-30	IGKJ3	IGHV3-33/16/IGKV2-30/11/0	clonally expanded
AB-001482	reactive	NANP6	NA	98	300µg	9	4	1.6	21	230	012M	not protected	FALSE	FALSE	IGHV3-33	IGHD3-9	IGHJ3	IGKV1-5	IGKJ1	IGHV3-33/16/IGKV1-5/9/1	>1 PB, monoclonal
AB-001483	indeterminate	NA	NA			10	6	1.6	7	233	012M	protected	FALSE	FALSE	IGHV3-15	IGHD3-3	IGHJ5	IGLV3-1	IGLJ7	IGHV3-15/15/IGLV3-1/10/2	clonally expanded
AB-001484	indeterminate	NA	NA			6	12	2.8	26	25	Fx017M	not protected	FALSE	FALSE	IGHV3-74	IGHD6-19	IGHJ4	IGKV3-11	IGKJ4	IGHV3-74/19/IGKV3-11/13/0	clonally expanded
AB-001485	not reactive	NA	NA			11	5	1.2	30	25	Fx017M	not protected	FALSE	FALSE	IGHV3-21	IGHD3-10	IGHJ4	IGLV1-44	IGLJ3	IGHV3-21/12/IGLV1-44/13/0	clonally expanded
AB-001486	reactive	NANP6	NA			6	6	2	25	23	Fx017M	not protected	FALSE	NA	IGHV3-33	IGHD4-17	IGHJ3	IGKV1-5	IGKJ1	IGHV3-33/20/IGKV1-5/9/0	clonally expanded
AB-001487	not reactive	NA	NA			5	12	3.8	9	229	012M	protected	FALSE	NA	IGHV5-51	IGHD3-10	IGHJ4	IGKV3-20	IGKJ1	IGHV5-51/18/IGKV3-20/10/0	clonally expanded
AB-001488	reactive	C-terminal (Pf16)	NA			6	3	1.7	9	228	012M	not protected	FALSE	FALSE	IGHV3-21	IGHD1-26	IGHJ4	IGLV3-1	IGLJ2	IGHV3-21/15/IGLV3-1/10/0	clonally expanded
AB-001489	not reactive	NA	NA			3	7	4.1	97	228	012M	not protected	FALSE	FALSE	IGHV1-2	IGHD6-19	IGHJ5	IGKV1-5	IGKJ4	IGHV1-2/11/IGKV1-5/11/0	clonally expanded
AB-001490	not reactive	NA	NA			11	3	1.5	23	208	012M	not protected	FALSE	NA	IGHV7-4-1	IGHD3-22	IGHJ4	IGLV4-69	IGLJ3	IGHV7-4-1/13/IGLV4-69/10/0	clonally expanded
AB-001491	not reactive	NA	NA			1	20	11.6	51	228	012M	not protected	FALSE	FALSE	IGHV4-39	IGHD3-10	IGHJ5	IGLV7-43	IGLJ2	IGHV4-39/12/IGLV7-43/10/0	clonally expanded
AB-001492	reactive	NANP6	NA	87	300µg	7	14	3.8	26	49	Fx017M	not protected	FALSE	NA	IGHV3-30	IGHD1-20	IGHJ6	IGKV1-9	IGKJ4	IGHV3-30/17/IGKV1-9/10/0	clonally expanded
AB-001493	reactive	NANP6	NA			2	14	4.7	2	23	Fx017M	not protected	FALSE	NA	IGHV3-33	IGHD3-9	IGHJ5	IGLV1-40	IGLJ2	IGHV3-33/16/IGLV1-40/12/0	clonally expanded
AB-001494	not reactive	NA	NA			2	25	6.8	7	49	Fx017M	not protected	TRUE	NA	IGHV3-9	IGHD4-17	IGHJ3	IGLV1-51	IGLJ2	IGHV3-9/13/IGLV1-51/12/0	clonally expanded
AB-001495	reactive	NANP6	NA	96	300µg	4	16	6.3	7	234	012M	not protected	TRUE	NA	IGHV3-33	IGHD2-15	IGHJ5	IGLV1-40	IGLJ1	IGHV3-33/18/IGLV1-40/12/0	clonally expanded
AB-001496	not reactive	NA	NA			4	6	2.8	33	207	012M	protected	FALSE	FALSE	IGHV3-30	IGHD6-19	IGHJ4	IGLV2-11	IGLJ2	IGHV3-30/19/IGLV2-11/11/0	clonally expanded
AB-001497	not reactive	NA	NA			3	3	4.7	2	205	012M	protected	FALSE	FALSE	IGHV1-69	IGHD4-17	IGHJ3	IGKV3-15	IGKJ2	IGHV1-69/16/IGKV3-15/11/0	clonally expanded
AB-001498	not reactive	NA	NA			8	3	1.7	39	216	012M	protected	FALSE	NA	IGHV3-21	IGHD2-15	IGHJ3	IGLV1-44	IGLJ2	IGHV3-21/20/IGLV1-44/12/0	clonally expanded
AB-001499	not reactive	NA	NA			6	8	4	42	208	012M	not protected	FALSE	NA	IGHV5-51	IGHD2-21	IGHJ4	IGKV3-15	IGKJ1	IGHV5-51/12/IGKV3-15/10/0	clonally expanded
AB-001500	reactive	NANP6	NA	75	300µg	3	8	5.6	7	209	012M	protected	FALSE	NA	IGHV3-49	IGHD4-17	IGHJ4	IGLV2-14	IGLJ2	IGHV3-49/15/IGLV2-14/12/0	clonally expanded
AB-001501	not reactive	NA	NA			4	7	3.2	58	236	012M	protected	FALSE	NA	IGHV4-4	IGHD4-17	IGHJ4	IGKV3-20	IGKJ3	IGHV4-4/13/IGKV3-20/10/0	clonally expanded
AB-001502	reactive	C-terminal (Pf16)	NA			2	11	6.4	44	228	012M	not protected	FALSE	TRUE	IGHV3-21	IGHD6-13	IGHJ4	IGLV3-21	IGLJ2	IGHV3-21/16/IGLV3-21/10/0	clonally expanded
AB-001503	reactive	NANP6	NA			2	25	9.9	8	234	012M	not protected	FALSE	NA	IGHV3-33	IGHD3-22	IGHJ4	IGKV2-30	IGKJ1	IGHV3-33/19/IGKV2-30/9/0	clonally expanded
AB-001504	reactive	C-terminal (Pf16)	NA			4	12	4.6	12	202	012M	not protected	FALSE	TRUE	IGHV4-39	IGHD1-26	IGHJ5	IGKV3-15	IGKJ1	IGHV4-39/22/IGKV3-15/10/0	clonally expanded
AB-001505	not reactive	NA	NA			1	15	8.4	7	216	012M	protected	FALSE	NA	IGHV3-48	IGHD2-21	IGHJ4	IGLV2-23	IGLJ1	IGHV3-48/14/IGLV2-23/11/0	clonally expanded
AB-001506	not reactive	NA	NA			11	5	2	48	234	012M	not protected	FALSE	NA	IGHV3-21	IGHD3-10	IGHJ4	IGLV2-23	IGLJ2	IGHV3-21/19/IGLV2-23/12/0	clonally expanded
AB-001507	not reactive	NA	NA			5	5	2.4	33	207	012M	protected	FALSE	FALSE	IGHV3-20	IGHD6-19	IGHJ2	IGKV1-5	IGKJ1	IGHV3-20/15/IGKV1-5/10/0	clonally expanded
AB-001508	reactive	NANP6	NA	85	300µg	3	13	6.4	13	208	012M	not protected	FALSE	NA	IGHV3-33	IGHD6-19	IGHJ5	IGKV4-1	IGKJ4	IGHV3-33/16/IGKV4-1/11/0	clonally expanded
AB-001509	not reactive	NA	NA			4	14	3.3	47	25	Fx017M	not protected	FALSE	FALSE	IGHV3-23	IGHD5-12	IGHJ4	IGKV3-20	IGKJ1	IGHV3-23/22/IGKV3-20/10/0	clonally expanded
AB-001510	reactive	NANP6	NA	94	300µg	4	18	7	22	230	012M	not protected	TRUE	FALSE	IGHV3-33	IGHD2-21	IGHJ6	IGKV1-5	IGKJ2	IGHV3-33/17/IGKV1-5/9/0	clonally expanded
AB-001511	reactive	NANP6	NA	95	300µg	4	16	5.1	4	229	012M	protected	FALSE	NA	IGHV3-33	IGHD3-22	IGHJ6	IGKV2-30	IGKJ2	IGHV3-33/16/IGKV2-30/9/0	clonally expanded
AB-001512	reactive	C-terminal (Pf16)	NA			2	8	9.4	37	54	Fx017M	not protected	FALSE	TRUE	IGHV3-30	IGHD2-2	IGHJ6	IGKV2-28	IGKJ3	IGHV3-30/26/IGKV2-28/10/0	clonally expanded
AB-001513	reactive	NANP6	NA	88	300µg	1	43	13	4	203	012M	protected	FALSE	TRUE	IGHV3-33	IGHD4-17	IGHJ2	IGLV1-40	IGLJ2	IGHV3-33/14/IGLV1-40/12/0	clonally expanded
AB-001514	not reactive	NA	NA			3	10	4.7	7	207	012M	protected	FALSE	TRUE	IGHV3-9	IGHD1-26	IGHJ4	IGKV4-1	IGKJ4	IGHV3-9/14/IGKV4-1/10/0	clonally expanded
AB-001515	not reactive	NA	NA			1	21	7	23	23	Fx017M	not protected	TRUE	NA	IGHV3-74	IGHD3-10	IGHJ4	IGLV2-11	IGLJ2	IGHV3-74/16/IGLV2-11/13/0	clonally expanded
AB-001516	reactive	NANP6	NA	74	300µg	3	4	4.7	41	54	Fx017M	not protected	FALSE	TRUE	IGHV3-30	IGHD3-3	IGHJ6	IGLV1-40	IGLJ3	IGHV3-30/24/IGLV1-40/12/0	clonally expanded
AB-001517	reactive	NANP6	NA	91	300µg	3	23	8.9	35	230	012M	not protected	TRUE	TRUE	IGHV3-33	IGHD3-3	IGHJ6	IGKV2D-29	IGKJ1	IGHV3-33/15/IGKV2D-29/9/0	clonally expanded
AB-001518	not reactive	NA	NA			9	7	2.8	55	234	012M	not protected	FALSE	NA	IGHV3-23	IGHD6-19	IGHJ4	IGKV1-33	IGKJ2	IGHV3-23/15/IGKV1-33/11/0	clonally expanded
AB-001519	not reactive	NA	NA			5	9	4.5	63	208	012M	not protected	FALSE	NA	IGHV4-34	IGHD3-9	IGHJ2	IGKV1-9	IGKJ1	IGHV4-34/28/IGKV1-9/10/0	clonally expanded
AB-001520	not reactive	NA	NA			5	7	2.3	67	23	Fx017M	not protected	FALSE	NA	IGHV3-7	IGHD3-22	IGHJ4	IGKV3-20	IGKJ3	IGHV3-7/9/IGKV3-20/10/0	clonally expanded
AB-001521	not reactive	NA	NA			5	5	3.1	45	38	Fx017M	protected	FALSE	NA	IGHV3-21	IGHD2-15	IGHJ4	IGKV3-15	IGKJ1	IGHV3-21/15/IGKV3-15/11/0	clonally expanded
AB-001523	not reactive	NA	NA			2	4	5.7	53	1	Fx017M	protected	FALSE	NA	IGHV3-33	IGHD3-10	IGHJ4	IGKV1-17	IGKJ1	IGHV3-33/10/IGKV1-17/10/0	clonally expanded
AB-001524	indeterminate	NA	NA			2	4	5.7	52	1	Fx017M	protected	FALSE	NA	IGHV3-7	IGHD5-5	IGHJ4	IGKV3-20	IGKJ3	IGHV3-7/13/IGKV3-20/10/0	clonally expanded
AB-001525	reactive	C-terminal (Pf16)	NA			3	3	4.3	34	1	Fx017M	protected	FALSE	NA	IGHV3-11	IGHD1-26	IGHJ6	IGLV3-1	IGLJ2	IGHV3-11/18/IGLV3-1/10/0	clonally expanded
AB-001526	not reactive	NA	NA			4	9	3.6	26	48	Fx017M	protected	TRUE	NA	IGHV3-33	IGHD6-19	IGHJ5	IGKV3D-11	IGKJ5	IGHV3-33/18/IGKV3D-11/10/0	clonally expanded
AB-001527	indeterminate	NA	NA			5	8	3.2	45	48	Fx017M	protected	FALSE	NA	IGHV4-34	IGHD3-22	IGHJ1	IGLV3-19	IGLJ1	IGHV4-34/20/IGLV3-19/13/0	clonally expanded
AB-001528	reactive	NANP6	NA			1	9	5.7	30	52	Fx017M	protected	FALSE	NA	IGHV3-33	IGHD6-6	IGHJ3	IGKV3-15	IGKJ1	IGHV3-33/17/IGKV3-15/9/0	clonally expanded
AB-001529	reactive	NANP6	NA	99	300µg	7	1	NA	17	52	Fx017M	protected	TRUE	NA	IGHV3-33	IGHD4-17	IGHJ3	IGKV1-5	IGKJ1	IGHV3-33/17/IGKV1-5/9/2	1 PB
AB-001530	not reactive	NA	NA			2	6	3.8	23	52	Fx017M	protected	FALSE	NA	IGHV3-53	IGHD7-27	IGHJ3	IGLV2-8	IGLJ3	IGHV3-53/17/IGLV2-8/11/0	clonally expanded
AB-001531	reactive	NANP6	NA			4	3	8.1	18	16	Fx017M	protected	FALSE	TRUE	IGHV3-33	IGHD4-17	IGHJ3	IGKV1-5	IGKJ1	IGHV3-33/22/IGKV1-5/9/0	clonally expanded
AB-001532	reactive	NANP6	NA			5	2	5.4	29	16	Fx017M	protected	FALSE	TRUE	IGHV3-33	IGHD1-26	IGHJ4	IGLV2-14	IGLJ3	IGHV3-33/15/IGLV2-14/6/0	clonally expanded
AB-001533	reactive	NANP6	NA	100	300µg	2	23	14.2	20	38	Fx017M	protected	FALSE	NA	IGHV3-30	IGHD3-22	IGHJ4	IGKV2-24	IGKJ2	IGHV3-30/16/IGKV2-24/9/0	clonally expanded
AB-001534	reactive	C-terminal (Pf16)	NA			4	6	3.7	23	38	Fx017M	protected	FALSE	NA	IGHV3-21	IGHD3-9	IGHJ3	IGKV3-20	IGKJ1	IGHV3-21/20/IGKV3-20/9/0	clonally expanded
AB-001535	reactive	NANP6	NA			3	8	3.3	12	6	Fx017M	protected	FALSE	NA	IGHV3-49	IGHD2-2	IGHJ4	IGKV3-11	IGKJ1	IGHV3-49/14/IGKV3-11/9/0	clonally expanded
AB-001536	reactive	NANP6	NA			4	7	2.9	13	6	Fx017M	protected	TRUE	NA	IGHV3-49	IGHD6-6	IGHJ4	IGKV2D-29	IGKJ1	IGHV3-49/13/IGKV2D-29/10/0	clonally expanded
AB-001537	reactive	NANP6	NA			5	1	NA	2	1	Fx017M	protected	FALSE	NA	IGHV3-33	IGHD3-3	IGHJ4	IGKV1-5	IGKJ1	IGHV3-33/17/IGKV1-5/9/1	1 PB
AB-001538	reactive	NANP6	NA			1	5	7.1	9	1	Fx017M	protected	FALSE	NA	IGHV3-23	IGHD4-17	IGHJ4	IGKV4-1	IGKJ1	IGHV3-23/12/IGKV4-1/10/0	clonally expanded
AB-001539	indeterminate	NA	NA			1	5	7.1	24	1	Fx017M	protected	FALSE	NA	IGHV3-43	IGHD6-6	IGHJ4	IGLV3-21	IGLJ2	IGHV3-43/14/IGLV3-21/12/0	clonally expanded
AB-001540	reactive	NANP6	NA			10	1	NA	8	216	012M	protected	FALSE	NA	IGHV3-33	IGHD3-10	IGHJ5	IGKV4-1	IGKJ4	IGHV3-33/12/IGKV4-1/10/1	1 PB
AB-001541	reactive	NANP6	NA			12	4	1.3	4	229	012M	protected	FALSE	NA	IGHV3-33	IGHD3-22	IGHJ4	IGKV1-39	IGKJ3	IGHV3-33/16/IGKV1-39/9/0	clonally expanded
AB-001542	not reactive	NA	NA			5	11	4.4	27	234	012M	not protected	FALSE	NA	IGHV3-15	IGHD6-19	IGHJ5	IGLV7-43	IGLJ3	IGHV3-15/10/IGLV7-43/10/0	clonally expanded
AB-001543	reactive	negative, peptide ELISAs	NA			11	5	1.5	9	203	012M	protected	FALSE	TRUE	IGHV3-48	IGHD3-3	IGHJ6	IGKV3-20	IGKJ1	IGHV3-48/23/IGKV3-20/10/0	clonally expanded
AB-001544	reactive	NANP6	NA	100	300µg	7	5	1.7	38	23	Fx017M	not protected	TRUE	NA	IGHV3-30	IGHD6-6	IGHJ4	IGKV1-5	IGKJ1	IGHV3-30/13/IGKV1-5/10/0	clonally expanded
AB-001545	reactive	NANP6	NA	98	300µg	7	9	2.7	0	203	012M	protected	TRUE	TRUE	IGHV3-33	IGHD4-4	IGHJ5	IGKV3-11	IGKJ5	IGHV3-33/15/IGKV3-11/9/0	clonally expanded
AB-001546	not reactive	NA	NA			9	5	2.5	12	208	012M	not protected	FALSE	NA	IGHV3-21	IGHD2-15	IGHJ6	IGLV3-25	IGLJ2	IGHV3-21/15/IGLV3-25/12/0	clonally expanded
AB-001547	reactive	NANP6	NA			6	3	2.1	11	209	012M	protected	TRUE	NA	IGHV5-51	IGHD3-22	IGHJ4	IGKV2-30	IGKJ2	IGHV5-51/16/IGKV2-30/10/0	clonally expanded
AB-001548	indeterminate	NA	NA			8	6	2.3	3	202	012M	not protected	FALSE	FALSE	IGHV1-18	IGHD3-10	IGHJ5	IGKV4-1	IGKJ2	IGHV1-18/22/IGKV4-1/10/0	clonally expanded
AB-001549	indeterminate	NA	NA			7	2	1.4	12	209	012M	protected	FALSE	NA	IGHV3-30	IGHD3-9	IGHJ6	IGLV3-19	IGLJ2	IGHV3-30/23/IGLV3-19/12/0	clonally expanded
AB-001550	reactive	C-terminal (Pf16)	NA			8	6	2.3	14	202	012M	not protected	FALSE	FALSE	IGHV3-23	IGHD3-22	IGHJ4	IGKV1-33	IGKJ4	IGHV3-23/18/IGKV1-33/10/0	clonally expanded
AB-001551	reactive	NANP6	NA	95	300µg	4	16	6.3	10	234	012M	not protected	FALSE	NA	IGHV3-49	IGHD2-15	IGHJ4	IGKV3-15	IGKJ1	IGHV3-49/13/IGKV3-15/9/0	clonally expanded
AB-001552	not reactive	NA	NA			8	8	2.2	7	233	012M	protected	FALSE	FALSE	IGHV3-15	IGHD5-5	IGHJ4	IGLV3-1	IGLJ2	IGHV3-15/13/IGLV3-1/11/0	clonally expanded
AB-001553	not reactive	NA	NA			5	2	2.4	50	54	Fx017M	not protected	TRUE	FALSE	IGHV3-33	IGHD2-2	IGHJ5	IGKV1-39	IGKJ4	IGHV3-33/15/IGKV1-39/11/2	clonally expanded
AB-001554	reactive	NANP6	NA	98	300µg	6	5	2.8	7	216	012M	protected	TRUE	NA	IGHV3-33	IGHD3-10	IGHJ3	IGKV2-30	IGKJ4	IGHV3-33/18/IGKV2-30/10/0	clonally expanded
AB-001555	reactive	NANP6	NA			1	35	13.9	2	234	012M	not protected	TRUE	NA	IGHV3-30	IGHD6-13	IGHJ3	IGKV1-5	IGKJ1	IGHV3-30/17/IGKV1-5/9/0	clonally expanded
AB-001556	not reactive	NA	NA			6	8	3.1	6	202	012M	not protected	FALSE	FALSE	IGHV3-21	IGHD3-16	IGHJ4	IGLV2-8	IGLJ1	IGHV3-21/13/IGLV2-8/12/0	clonally expanded
AB-001557	reactive	NANP6	NA	87	300µg	7	6	2.3	13	230	012M	not protected	TRUE	TRUE	IGHV3-33	IGHD3-16	IGHJ5	IGLV1-40	IGLJ1	IGHV3-33/19/IGLV1-40/12/0	clonally expanded
AB-001558	reactive	NANP6	NA	100	300µg	5	4	2.8	12	209	012M	protected	FALSE	NA	IGHV3-33	IGHD4-17	IGHJ3	IGKV3-15	IGKJ1	IGHV3-33/18/IGKV3-15/9/0	clonally expanded
AB-001559	indeterminate	NA	NA			6	3	1.7	45	228	012M	not protected	FALSE	FALSE	IGHV3-48	IGHD4-17	IGHJ3	IGKV4-1	IGKJ2	IGHV3-48/16/IGKV4-1/10/0	clonally expanded
AB-001560	indeterminate	NA	NA			1	18	8.9	11	208	012M	not protected	TRUE	NA	IGHV3-30	IGHD1-26	IGHJ4	IGLV3-25	IGLJ2	IGHV3-30/13/IGLV3-25/12/0	clonally expanded
AB-001561	reactive	NANP6	NA			5	5	2.4	7	207	012M	protected	FALSE	FALSE	IGHV3-33	IGHD4-17	IGHJ4	IGKV2-24	IGKJ2	IGHV3-33/17/IGKV2-24/9/0	clonally expanded
AB-001562	not reactive	NA	NA			4	2	3.1	24	205	012M	protected	FALSE	TRUE	IGHV3-23	IGHD6-19	IGHJ4	IGLV2-14	IGLJ1	IGHV3-23/13/IGLV2-14/11/0	clonally expanded
AB-001563	indeterminate	NA	NA			12	4	0.94	38	25	Fx017M	not protected	FALSE	FALSE	IGHV3-30	IGHD3-16	IGHJ4	IGKV3-15	IGKJ1	IGHV3-30/19/IGKV3-15/11/0	clonally expanded
AB-001564	not reactive	NA	NA			11	5	1.3	13	233	012M	protected	TRUE	TRUE	IGHV3-21	IGHD3-10	IGHJ4	IGLV1-44	IGLJ3	IGHV3-21/14/IGLV1-44/12/0	clonally expanded
AB-001565	reactive	NANP6	NA	49	300µg	12	4	1.3	51	229	012M	protected	FALSE	NA	IGHV1-2	IGHD6-6	IGHJ4	IGKV1-39	IGKJ1	IGHV1-2/15/IGKV1-39/9/0	clonally expanded
AB-001566	reactive	NANP6	NA			9	3	1	17	23	Fx017M	not protected	TRUE	NA	IGHV3-33	IGHD3-22	IGHJ4	IGKV3-15	IGKJ3	IGHV3-33/17/IGKV3-15/9/0	clonally expanded
AB-001567	not reactive	NA	NA			7	9	2.9	7	229	012M	protected	TRUE	NA	IGHV3-21	IGHD3-10	IGHJ6	IGKV3-11	IGKJ5	IGHV3-21/14/IGKV3-11/10/0	clonally expanded
AB-001568	reactive	NANP6	NA			6	16	4.3	24	49	Fx017M	not protected	TRUE	NA	IGHV1-2	IGHD3-16	IGHJ3	IGKV2-28	IGKJ4	IGHV1-2/15/IGKV2-28/10/0	clonally expanded
AB-001569	not reactive	NA	NA			6	3	2.1	10	209	012M	protected	FALSE	NA	IGHV3-33	IGHD6-19	IGHJ4	IGKV1-16	IGKJ4	IGHV3-33/14/IGKV1-16/10/0	clonally expanded
AB-001570	indeterminate	NA	NA			8	8	2.4	19	203	012M	protected	TRUE	TRUE	IGHV1-69	IGHD2-2	IGHJ6	IGKV3D-20	IGKJ3	IGHV1-69/20/IGKV3D-20/9/0	clonally expanded
AB-001571	reactive	NANP6	NA			11	5	1.3	9	233	012M	protected	FALSE	TRUE	IGHV3-30	IGHD2-15	IGHJ3	IGKV3-15	IGKJ1	IGHV3-30/22/IGKV3-15/9/0	clonally expanded
AB-001572	reactive	NANP6	NA			6	10	4	7	234	012M	not protected	FALSE	NA	IGHV3-33	IGHD2-15	IGHJ3	IGKV2-29	IGKJ1	IGHV3-33/15/IGKV2-29/9/0	clonally expanded
AB-001573	not reactive	NA	NA			8	6	2.3	7	202	012M	not protected	FALSE	FALSE	IGHV3-33	IGHD3-9	IGHJ4	IGKV1-12	IGKJ1	IGHV3-33/17/IGKV1-12/10/0	clonally expanded
AB-001574	reactive	NANP6	NA			7	14	3.8	21	49	Fx017M	not protected	TRUE	NA	IGHV3-30	IGHD6-13	IGHJ4	IGKV1-5	IGKJ4	IGHV3-30/13/IGKV1-5/11/0	clonally expanded
AB-001575	not reactive	NA	NA			13	1	NA	8	202	012M	not protected	FALSE	FALSE	IGHV1-3	IGHD2-8	IGHJ6	IGKV1-39	IGKJ3	IGHV1-3/27/IGKV1-39/11/0	1 PB
AB-001576	not reactive	NA	NA			12	6	1.6	21	49	Fx017M	not protected	FALSE	NA	IGHV3-30	IGHD6-25	IGHJ6	IGLV6-57	IGLJ3	IGHV3-30/14/IGLV6-57/10/0	clonally expanded
AB-001577	reactive	NANP6	NA	100	300µg	7	9	2.1	27	25	Fx017M	not protected	FALSE	FALSE	IGHV3-49	IGHD1-26	IGHJ4	IGKV3-20	IGKJ1	IGHV3-49/14/IGKV3-20/10/0	clonally expanded
AB-001578	reactive	NANP6	NA	91	300µg	8	8	2.5	8	229	012M	protected	TRUE	NA	IGHV3-33	IGHD3-22	IGHJ4	IGKV3-11	IGKJ3	IGHV3-33/18/IGKV3-11/10/0	clonally expanded
																					ID, identifier; NA, not applicable; NT, not tested; P3D, post-third dose RTS,S
																					aLineages observed with only 1 PB lack evidence of recent expansion and noted as "NA"; bNA for mAbs from vaccinees from whom P4D samples were not sequenced
