# Supplementary material for: An antibody drug engineered for prevention of malaria in global populations
Source: Research Square preprint supplement (doi:10.21203/rs.3.rs-2678519/v1), 2023-04-04
Supplement: Supplementary file 2 [file 46032287c5d72bddbb42df7b.xlsx]

## Sheet: Supplementary Table 6
Supplementary Table 6 | Residue positions of AB-000224
MS-1782_LC (AB-000224)					MS-1782_HC (AB-000224)
Residue	Linear #	Mat. Linear #	ASN #		Residue	Linear #	Mat. Linear #	ASN #
M	1	-19	LmdLdr#1:-19		M	1	-22	KLdr#1:-22
A	2	-18	LmdLdr#1:-18		D	2	-21	KLdr#1:-21
W	3	-17	LmdLdr#1:-17		M	3	-20	KLdr#1:-20
A	4	-16	LmdLdr#1:-16		R	4	-19	KLdr#1:-19
L	5	-15	LmdLdr#1:-15		V	5	-18	KLdr#1:-18
L	6	-14	LmdLdr#1:-14		P	6	-17	KLdr#1:-17
L	7	-13	LmdLdr#1:-13		A	7	-16	KLdr#1:-16
L	8	-12	LmdLdr#1:-12		Q	8	-15	KLdr#1:-15
T	9	-11	LmdLdr#1:-11		L	9	-14	KLdr#1:-14
L	10	-10	LmdLdr#1:-10		L	10	-13	KLdr#1:-13
L	11	-9	LmdLdr#1:-9		G	11	-12	KLdr#1:-12
T	12	-8	LmdLdr#1:-8		L	12	-11	KLdr#1:-11
Q	13	-7	LmdLdr#1:-7		L	13	-10	KLdr#1:-10
G	14	-6	LmdLdr#1:-6		L	14	-9	KLdr#1:-9
T	15	-5	LmdLdr#1:-5		L	15	-8	KLdr#1:-8
G	16	-4	LmdLdr#1:-4		W	16	-7	KLdr#1:-7
S	17	-3	LmdLdr#1:-3		L	17	-6	KLdr#1:-6
W	18	-2	LmdLdr#1:-2		R	18	-5	KLdr#1:-5
A	19	-1	LmdLdr#1:-1		G	19	-4	KLdr#1:-4
E	20	1	LmdV:1		A	20	-3	KLdr#1:-3
S	21	2	LmdV:2		R	21	-2	KLdr#1:-2
V	22	3	LmdV:3		C	22	-1	KLdr#1:-1
L	23	4	LmdV:4		E	23	1	HV:1
T	24	5	LmdV:5		V	24	2	HV:2
Q	25	6	LmdV:6		Q	25	3	HV:3
P	26	7	LmdV:7		L	26	4	HV:4
-	26.1	7.1	LmdV:8		V	27	5	HV:5
P	27	8	LmdV:9		E	28	6	HV:6
S	28	9	LmdV:10		S	29	7	HV:7
V	29	10	LmdV:11		-	29.1	7.1	HV:8
S	30	11	LmdV:12		G	30	8	HV:9
G	31	12	LmdV:13		G	31	9	HV:10
A	32	13	LmdV:14		G	32	10	HV:11
P	33	14	LmdV:15		L	33	11	HV:12
G	34	15	LmdV:16		V	34	12	HV:13
Q	35	16	LmdV:17		Q	35	13	HV:14
R	36	17	LmdV:18		P	36	14	HV:15
V	37	18	LmdV:19		G	37	15	HV:16
T	38	19	LmdV:20		R	38	16	HV:17
I	39	20	LmdV:21		S	39	17	HV:18
S	40	21	LmdV:22		L	40	18	HV:19
C	41	22	LmdV:23		R	41	19	HV:20
T	42	23	LmdV:24		L	42	20	HV:21
G	43	24	LmdV:25		P	43	21	HV:22
M	44	25	LmdV:26		C	44	22	HV:23
N	45	26	LmdV:27		T	45	23	HV:24
-	45.1	26.1	LmdV:28		A	46	24	HV:25
S	46	27	LmdV:29		S	47	25	HV:26
N	47	28	LmdV:30		G	48	26	HV:27
I	48	29	LmdV:31		-	48.1	26.1	HV:28
G	49	30	LmdV:32		F	49	27	HV:29
A	50	31	LmdV:33		S	50	28	HV:30
G	51	32	LmdV:34		F	51	29	HV:31
-	51.1	32.1	LmdV:35		G	52	30	HV:32
-	51.2	32.2	LmdV:36		D	53	31	HV:33
-	51.3	32.3	LmdV:37		-	53.1	31.1	HV:34
-	51.4	32.4	LmdV:38		-	53.2	31.2	HV:35
Y	52	33	LmdV:39		-	53.3	31.3	HV:36
D	53	34	LmdV:40		-	53.4	31.4	HV:37
V	54	35	LmdV:41		-	53.5	31.5	HV:38
Y	55	36	LmdV:42		H	54	32	HV:39
W	56	37	LmdV:43		A	55	33	HV:40
Y	57	38	LmdV:44		M	56	34	HV:41
Q	58	39	LmdV:45		S	57	35	HV:42
Q	59	40	LmdV:46		W	58	36	HV:43
L	60	41	LmdV:47		V	59	37	HV:44
P	61	42	LmdV:48		R	60	38	HV:45
G	62	43	LmdV:49		Q	61	39	HV:46
R	63	44	LmdV:50		A	62	40	HV:47
A	64	45	LmdV:51		P	63	41	HV:48
P	65	46	LmdV:52		G	64	42	HV:49
K	66	47	LmdV:53		K	65	43	HV:50
L	67	48	LmdV:54		G	66	44	HV:51
L	68	49	LmdV:55		L	67	45	HV:52
I	69	50	LmdV:56		E	68	46	HV:53
Y	70	51	LmdV:57		W	69	47	HV:54
G	71	52	LmdV:58		V	70	48	HV:55
-	71.1	52.1	LmdV:59		G	71	49	HV:56
-	71.2	52.2	LmdV:60		F	72	50	HV:57
-	71.3	52.3	LmdV:61		I	73	51	HV:58
-	71.4	52.4	LmdV:62		R	74	52	HV:59
-	71.5	52.5	LmdV:63		K	75	53	HV:60
-	71.6	52.6	LmdV:64		T	76	54	HV:61
-	71.7	52.7	LmdV:65		-	76.1	54.1	HV:62
-	71.8	52.8	LmdV:66		T	77	55	HV:63
N	72	53	LmdV:67		Y	78	56	HV:64
S	73	54	LmdV:68		G	79	57	HV:65
N	74	55	LmdV:69		A	80	58	HV:66
R	75	56	LmdV:70		T	81	59	HV:67
P	76	57	LmdV:71		T	82	60	HV:68
S	77	58	LmdV:72		H	83	61	HV:69
G	78	59	LmdV:73		Y	84	62	HV:70
V	79	60	LmdV:74		A	85	63	HV:71
P	80	61	LmdV:75		A	86	64	HV:72
D	81	62	LmdV:76		A	87	65	HV:73
R	82	63	LmdV:77		V	88	66	HV:74
F	83	64	LmdV:78		R	89	67	HV:75
S	84	65	LmdV:79		G	90	68	HV:76
G	85	66	LmdV:80		R	91	69	HV:77
S	86	67	LmdV:81		F	92	70	HV:78
R	87	68	LmdV:82		T	93	71	HV:79
S	88	69	LmdV:83		I	94	72	HV:80
G	89	70	LmdV:84		S	95	73	HV:81
-	89.1	70.1	LmdV:85		R	96	74	HV:82
-	89.2	70.2	LmdV:86		D	97	75	HV:83
T	90	71	LmdV:87		D	98	76	HV:84
S	91	72	LmdV:88		S	99	77	HV:85
A	92	73	LmdV:89		K	100	78	HV:86
S	93	74	LmdV:90		S	101	79	HV:87
L	94	75	LmdV:91		I	102	80	HV:88
A	95	76	LmdV:92		V	103	81	HV:89
I	96	77	LmdV:93		Y	104	82	HV:90
T	97	78	LmdV:94		L	105	83	HV:91
G	98	79	LmdV:95		Q	106	84	HV:92
L	99	80	LmdV:96		M	107	85	HV:93
Q	100	81	LmdV:97		N	108	86	HV:94
A	101	82	LmdV:98		S	109	87	HV:95
E	102	83	LmdV:99		L	110	88	HV:96
D	103	84	LmdV:100		K	111	89	HV:97
E	104	85	LmdV:101		T	112	90	HV:98
A	105	86	LmdV:102		E	113	91	HV:99
D	106	87	LmdV:103		D	114	92	HV:100
Y	107	88	LmdV:104		T	115	93	HV:101
Y	108	89	LmdV:105		A	116	94	HV:102
C	109	90	LmdV:106		V	117	95	HV:103
Q	110	91	LmdV:107		Y	118	96	HV:104
S	111	92	LmdV:108		F	119	97	HV:105
Y	112	93	LmdV:109		C	120	98	HV:106
D	113	94	LmdV:110		T	121	99	HV:107
T	114	95	LmdV:111		R	122	100	HV:108
S	115	96	LmdV:112		V	123	101	HV:109
-	115.1	96.1	LmdV:113		Q	124	102	HV:110
-	115.2	96.2	LmdV:114		L	125	103	HV:111
-	115.3	96.3	LmdV:115		D	126	104	HV:112
-	115.4	96.4	LmdV:116		Y	127	105	HV:113
-	115.5	96.5	LmdV:117		G	128	106	HV:114
-	115.6	96.6	LmdV:118		P	129	107	HV:115
-	115.7	96.7	LmdV:119		-	129.1	107.1	HV:116
-	115.8	96.8	LmdV:120		-	129.2	107.2	HV:117
-	115.9	96.9	LmdV:121		-	129.3	107.3	HV:118
-	115.10	96.10	LmdV:122		-	129.4	107.4	HV:119
-	115.11	96.11	LmdV:123		-	129.5	107.5	HV:120
-	115.12	96.12	LmdV:124		-	129.6	107.6	HV:121
-	115.13	96.13	LmdV:125		-	129.7	107.7	HV:122
-	115.14	96.14	LmdV:126		-	129.8	107.8	HV:123
-	115.15	96.15	LmdV:127		-	129.9	107.9	HV:124
-	115.16	96.16	LmdV:128		-	129.10	107.10	HV:125
-	115.17	96.17	LmdV:129		-	129.11	107.11	HV:126
-	115.18	96.18	LmdV:130		-	129.12	107.12	HV:127
-	115.19	96.19	LmdV:131		-	129.13	107.13	HV:128
-	115.20	96.20	LmdV:132		-	129.14	107.14	HV:129
-	115.21	96.21	LmdV:133		G	130	108	HV:130
L	116	97	LmdV:134		Y	131	109	HV:131
N	117	98	LmdV:135		Q	132	110	HV:132
G	118	99	LmdV:136		Y	133	111	HV:133
W	119	100	LmdV:137		Y	134	112	HV:134
A	120	101	LmdV:138		G	135	113	HV:135
F	121	102	LmdV:139		M	136	114	HV:136
G	122	103	LmdV:140		D	137	115	HV:137
G	123	104	LmdV:141		V	138	116	HV:138
G	124	105	LmdV:142		W	139	117	HV:139
T	125	106	LmdV:143		G	140	118	HV:140
K	126	107	LmdV:144		Q	141	119	HV:141
L	127	108	LmdV:145		G	142	120	HV:142
T	128	109	LmdV:146		T	143	121	HV:143
V	129	110	LmdV:147		T	144	122	HV:144
L	130	111	LmdV:148		V	145	123	HV:145
G	131	112	LmdV:149		T	146	124	HV:146
Q	132	113	LmdCnst-Ig:1		V	147	125	HV:147
P	133	114	LmdCnst-Ig:2		S	148	126	HV:148
K	134	115	LmdCnst-Ig:3		S	149	127	HV:149
A	135	116	LmdCnst-Ig:4		-	149.1	127.1	HCnst-Ig:1
A	136	117	LmdCnst-Ig:5		-	149.2	127.2	HCnst-Ig:2
P	137	118	LmdCnst-Ig:6		A	150	128	HCnst-Ig:3
S	138	119	LmdCnst-Ig:7		S	151	129	HCnst-Ig:4
V	139	120	LmdCnst-Ig:8		T	152	130	HCnst-Ig:5
T	140	121	LmdCnst-Ig:9		K	153	131	HCnst-Ig:6
L	141	122	LmdCnst-Ig:10		G	154	132	HCnst-Ig:7
F	142	123	LmdCnst-Ig:11		P	155	133	HCnst-Ig:8
P	143	124	LmdCnst-Ig:12		S	156	134	HCnst-Ig:9
P	144	125	LmdCnst-Ig:13		V	157	135	HCnst-Ig:10
S	145	126	LmdCnst-Ig:14		F	158	136	HCnst-Ig:11
S	146	127	LmdCnst-Ig:15		P	159	137	HCnst-Ig:12
E	147	128	LmdCnst-Ig:16		L	160	138	HCnst-Ig:13
-	147.1	128.1	LmdCnst-Ig:17		A	161	139	HCnst-Ig:14
-	147.2	128.2	LmdCnst-Ig:18		P	162	140	HCnst-Ig:15
E	148	129	LmdCnst-Ig:19		-	162.1	140.1	HCnst-Ig:16
L	149	130	LmdCnst-Ig:20		S	163	141	HCnst-Ig:17
-	149.1	130.1	LmdCnst-Ig:21		-	163.1	141.1	HCnst-Ig:18
-	149.2	130.2	LmdCnst-Ig:22		S	164	142	HCnst-Ig:19
Q	150	131	LmdCnst-Ig:23		K	165	143	HCnst-Ig:20
A	151	132	LmdCnst-Ig:24		S	166	144	HCnst-Ig:21
N	152	133	LmdCnst-Ig:25		T	167	145	HCnst-Ig:22
K	153	134	LmdCnst-Ig:26		S	168	146	HCnst-Ig:23
A	154	135	LmdCnst-Ig:27		G	169	147	HCnst-Ig:24
T	155	136	LmdCnst-Ig:28		G	170	148	HCnst-Ig:25
L	156	137	LmdCnst-Ig:29		T	171	149	HCnst-Ig:26
V	157	138	LmdCnst-Ig:30		A	172	150	HCnst-Ig:27
C	158	139	LmdCnst-Ig:31		A	173	151	HCnst-Ig:28
L	159	140	LmdCnst-Ig:32		L	174	152	HCnst-Ig:29
V	160	141	LmdCnst-Ig:33		G	175	153	HCnst-Ig:30
S	161	142	LmdCnst-Ig:34		C	176	154	HCnst-Ig:31
D	162	143	LmdCnst-Ig:35		L	177	155	HCnst-Ig:32
F	163	144	LmdCnst-Ig:36		V	178	156	HCnst-Ig:33
Y	164	145	LmdCnst-Ig:37		K	179	157	HCnst-Ig:34
P	165	146	LmdCnst-Ig:38		D	180	158	HCnst-Ig:35
-	165.1	146.1	LmdCnst-Ig:39		Y	181	159	HCnst-Ig:36
-	165.2	146.2	LmdCnst-Ig:40		F	182	160	HCnst-Ig:37
G	166	147	LmdCnst-Ig:41		P	183	161	HCnst-Ig:38
A	167	148	LmdCnst-Ig:42		-	183.1	161.1	HCnst-Ig:39
V	168	149	LmdCnst-Ig:43		-	183.2	161.2	HCnst-Ig:40
T	169	150	LmdCnst-Ig:44		E	184	162	HCnst-Ig:41
V	170	151	LmdCnst-Ig:45		P	185	163	HCnst-Ig:42
A	171	152	LmdCnst-Ig:46		V	186	164	HCnst-Ig:43
W	172	153	LmdCnst-Ig:47		T	187	165	HCnst-Ig:44
-	172.1	153.1	LmdCnst-Ig:48		V	188	166	HCnst-Ig:45
K	173	154	LmdCnst-Ig:49		S	189	167	HCnst-Ig:46
A	174	155	LmdCnst-Ig:50		W	190	168	HCnst-Ig:47
D	175	156	LmdCnst-Ig:51		-	190.1	168.1	HCnst-Ig:48
G	176	157	LmdCnst-Ig:52		N	191	169	HCnst-Ig:49
S	177	158	LmdCnst-Ig:53		S	192	170	HCnst-Ig:50
P	178	159	LmdCnst-Ig:54		G	193	171	HCnst-Ig:51
V	179	160	LmdCnst-Ig:55		A	194	172	HCnst-Ig:52
K	180	161	LmdCnst-Ig:56		L	195	173	HCnst-Ig:53
V	181	162	LmdCnst-Ig:57		T	196	174	HCnst-Ig:54
G	182	163	LmdCnst-Ig:58		S	197	175	HCnst-Ig:55
V	183	164	LmdCnst-Ig:59		G	198	176	HCnst-Ig:56
E	184	165	LmdCnst-Ig:60		V	199	177	HCnst-Ig:57
T	185	166	LmdCnst-Ig:61		H	200	178	HCnst-Ig:58
T	186	167	LmdCnst-Ig:62		T	201	179	HCnst-Ig:59
K	187	168	LmdCnst-Ig:63		-	201.1	179.1	HCnst-Ig:60
P	188	169	LmdCnst-Ig:64		-	201.2	179.2	HCnst-Ig:61
S	189	170	LmdCnst-Ig:65		-	201.3	179.3	HCnst-Ig:62
K	190	171	LmdCnst-Ig:66		F	202	180	HCnst-Ig:63
Q	191	172	LmdCnst-Ig:67		P	203	181	HCnst-Ig:64
-	191.1	172.1	LmdCnst-Ig:68		A	204	182	HCnst-Ig:65
-	191.2	172.2	LmdCnst-Ig:69		V	205	183	HCnst-Ig:66
-	191.3	172.3	LmdCnst-Ig:70		L	206	184	HCnst-Ig:67
-	191.4	172.4	LmdCnst-Ig:71		Q	207	185	HCnst-Ig:68
-	191.5	172.5	LmdCnst-Ig:72		-	207.1	185.1	HCnst-Ig:69
S	192	173	LmdCnst-Ig:73		-	207.2	185.2	HCnst-Ig:70
N	193	174	LmdCnst-Ig:74		-	207.3	185.3	HCnst-Ig:71
N	194	175	LmdCnst-Ig:75		-	207.4	185.4	HCnst-Ig:72
K	195	176	LmdCnst-Ig:76		S	208	186	HCnst-Ig:73
Y	196	177	LmdCnst-Ig:77		S	209	187	HCnst-Ig:74
A	197	178	LmdCnst-Ig:78		G	210	188	HCnst-Ig:75
A	198	179	LmdCnst-Ig:79		L	211	189	HCnst-Ig:76
S	199	180	LmdCnst-Ig:80		Y	212	190	HCnst-Ig:77
S	200	181	LmdCnst-Ig:81		S	213	191	HCnst-Ig:78
Y	201	182	LmdCnst-Ig:82		L	214	192	HCnst-Ig:79
L	202	183	LmdCnst-Ig:83		S	215	193	HCnst-Ig:80
S	203	184	LmdCnst-Ig:84		S	216	194	HCnst-Ig:81
L	204	185	LmdCnst-Ig:85		V	217	195	HCnst-Ig:82
T	205	186	LmdCnst-Ig:86		V	218	196	HCnst-Ig:83
P	206	187	LmdCnst-Ig:87		T	219	197	HCnst-Ig:84
E	207	188	LmdCnst-Ig:88		V	220	198	HCnst-Ig:85
Q	208	189	LmdCnst-Ig:89		P	221	199	HCnst-Ig:86
W	209	190	LmdCnst-Ig:90		S	222	200	HCnst-Ig:87
-	209.1	190.1	LmdCnst-Ig:91		S	223	201	HCnst-Ig:88
K	210	191	LmdCnst-Ig:92		S	224	202	HCnst-Ig:89
S	211	192	LmdCnst-Ig:93		L	225	203	HCnst-Ig:90
H	212	193	LmdCnst-Ig:94		-	225.1	203.1	HCnst-Ig:91
R	213	194	LmdCnst-Ig:95		G	226	204	HCnst-Ig:92
S	214	195	LmdCnst-Ig:96		T	227	205	HCnst-Ig:93
-	214.1	195.1	LmdCnst-Ig:97		Q	228	206	HCnst-Ig:94
-	214.2	195.2	LmdCnst-Ig:98		T	229	207	HCnst-Ig:95
Y	215	196	LmdCnst-Ig:99		-	229.1	207.1	HCnst-Ig:96
S	216	197	LmdCnst-Ig:100		-	229.2	207.2	HCnst-Ig:97
C	217	198	LmdCnst-Ig:101		-	229.3	207.3	HCnst-Ig:98
R	218	199	LmdCnst-Ig:102		Y	230	208	HCnst-Ig:99
V	219	200	LmdCnst-Ig:103		I	231	209	HCnst-Ig:100
T	220	201	LmdCnst-Ig:104		C	232	210	HCnst-Ig:101
H	221	202	LmdCnst-Ig:105		N	233	211	HCnst-Ig:102
E	222	203	LmdCnst-Ig:106		V	234	212	HCnst-Ig:103
G	223	204	LmdCnst-Ig:107		N	235	213	HCnst-Ig:104
S	224	205	LmdCnst-Ig:108		H	236	214	HCnst-Ig:105
T	225	206	LmdCnst-Ig:109		K	237	215	HCnst-Ig:106
-	225.1	206.1	LmdCnst-Ig:110		P	238	216	HCnst-Ig:107
-	225.2	206.2	LmdCnst-Ig:111		S	239	217	HCnst-Ig:108
V	226	207	LmdCnst-Ig:112		N	240	218	HCnst-Ig:109
E	227	208	LmdCnst-Ig:113		-	240.1	218.1	HCnst-Ig:110
K	228	209	LmdCnst-Ig:114		-	240.2	218.2	HCnst-Ig:111
T	229	210	LmdCnst-Ig:115		T	241	219	HCnst-Ig:112
V	230	211	LmdCnst-Ig:116		K	242	220	HCnst-Ig:113
-	230.1	211.1	LmdCnst-Ig:117		V	243	221	HCnst-Ig:114
A	231	212	LmdCnst-Ig:118		D	244	222	HCnst-Ig:115
P	232	213	LmdCnst-Ig:119		K	245	223	HCnst-Ig:116
A	233	214	LmdCnst-Ig:120		-	245.1	223.1	HCnst-Ig:117
E	234	215	LmdCnst-Ig:121		K	246	224	HCnst-Ig:118
C	235	216	LmdCnst-Ig:122		V	247	225	HCnst-Ig:119
S	236	217	LmdCnst-Ig:123		-	247.1	225.1	HCnst-Ig:120
					-	247.2	225.2	HCnst-Ig:121
					-	247.3	225.3	HCnst-Ig:122
					-	247.4	225.4	HCnst-Ig:123
					-	247.5	225.1	Hinge:1
					-	247.6	225.2	Hinge:2
					-	247.7	225.3	Hinge:3
					-	247.8	225.4	Hinge:4
					-	247.9	225.5	Hinge:5
					-	247.10	225.6	Hinge:6
					-	247.11	225.7	Hinge:7
					-	247.12	225.8	Hinge:8
					-	247.13	225.9	Hinge:9
					-	247.14	225.10	Hinge:10
					-	247.15	225.11	Hinge:11
					-	247.16	225.12	Hinge:12
					-	247.17	225.13	Hinge:13
					-	247.18	225.14	Hinge:14
					-	247.19	225.15	Hinge:15
					-	247.20	225.16	Hinge:16
					-	247.21	225.17	Hinge:17
					-	247.22	225.18	Hinge:18
					-	247.23	225.19	Hinge:19
					-	247.24	225.20	Hinge:20
					-	247.25	225.21	Hinge:21
					-	247.26	225.22	Hinge:22
					-	247.27	225.23	Hinge:23
					-	247.28	225.24	Hinge:24
					-	247.29	225.25	Hinge:25
					-	247.30	225.26	Hinge:26
					-	247.31	225.27	Hinge:27
					-	247.32	225.28	Hinge:28
					-	247.33	225.29	Hinge:29
					-	247.34	225.30	Hinge:30
					-	247.35	225.31	Hinge:31
					-	247.36	225.32	Hinge:32
					-	247.37	225.33	Hinge:33
					-	247.38	225.34	Hinge:34
					-	247.39	225.35	Hinge:35
					-	247.40	225.36	Hinge:36
					-	247.41	225.37	Hinge:37
					-	247.42	225.38	Hinge:38
					-	247.43	225.39	Hinge:39
					-	247.44	225.40	Hinge:40
					-	247.45	225.41	Hinge:41
					-	247.46	225.42	Hinge:42
					-	247.47	225.43	Hinge:43
					-	247.48	225.44	Hinge:44
					-	247.49	225.45	Hinge:45
					-	247.50	225.46	Hinge:46
					-	247.51	225.47	Hinge:47
					-	247.52	225.48	Hinge:48
					-	247.53	225.49	Hinge:49
					-	247.54	225.50	Hinge:50
					-	247.55	225.51	Hinge:51
					-	247.56	225.52	Hinge:52
					-	247.57	225.53	Hinge:53
					-	247.58	225.54	Hinge:54
					-	247.59	225.55	Hinge:55
					-	247.60	225.56	Hinge:56
					-	247.61	225.57	Hinge:57
					-	247.62	225.58	Hinge:58
					-	247.63	225.59	Hinge:59
					-	247.64	225.60	Hinge:60
					-	247.65	225.61	Hinge:61
					-	247.66	225.62	Hinge:62
					-	247.67	225.63	Hinge:63
					-	247.68	225.64	Hinge:64
					-	247.69	225.65	Hinge:65
					-	247.70	225.66	Hinge:66
					-	247.71	225.67	Hinge:67
					-	247.72	225.68	Hinge:68
					-	247.73	225.69	Hinge:69
					-	247.74	225.70	Hinge:70
					-	247.75	225.71	Hinge:71
					-	247.76	225.72	Hinge:72
					-	247.77	225.73	Hinge:73
					-	247.78	225.74	Hinge:74
					-	247.79	225.75	Hinge:75
					-	247.80	225.76	Hinge:76
					-	247.81	225.77	Hinge:77
					-	247.82	225.78	Hinge:78
					-	247.83	225.79	Hinge:79
					-	247.84	225.80	Hinge:80
					-	247.85	225.81	Hinge:81
					-	247.86	225.82	Hinge:82
					-	247.87	225.83	Hinge:83
					-	247.88	225.84	Hinge:84
					-	247.89	225.85	Hinge:85
					-	247.90	225.86	Hinge:86
					-	247.91	225.87	Hinge:87
					-	247.92	225.88	Hinge:88
					-	247.93	225.89	Hinge:89
					-	247.94	225.90	Hinge:90
					-	247.95	225.91	Hinge:91
					-	247.96	225.92	Hinge:92
					-	247.97	225.93	Hinge:93
					-	247.98	225.94	Hinge:94
					-	247.99	225.95	Hinge:95
					E	248	226	Hinge:96
					P	249	227	Hinge:97
					K	250	228	Hinge:98
					S	251	229	Hinge:99
					-	251.1	229.1	Hinge:100
					-	251.2	229.2	Hinge:101
					-	251.3	229.3	Hinge:102
					-	251.4	229.4	Hinge:103
					-	251.5	229.5	Hinge:104
					-	251.6	229.6	Hinge:105
					-	251.7	229.7	Hinge:106
					C	252	230	Hinge:107
					D	253	231	Hinge:108
					K	254	232	Hinge:109
					T	255	233	Hinge:110
					H	256	234	Hinge:111
					T	257	235	Hinge:112
					C	258	236	Hinge:113
					P	259	237	Hinge:114
					P	260	238	Hinge:115
					C	261	239	Hinge:116
					P	262	240	Hinge:117
					A	263	241	Hinge:118
					P	264	242	Hinge:119
					E	265	243	Hinge:120
					L	266	244	Hinge:121
					L	267	245	Hinge:122
					G	268	246	Hinge:123
					-	268.1	246.1	Fc-N:1
					-	268.2	246.2	Fc-N:2
					-	268.3	246.3	Fc-N:3
					-	268.4	246.4	Fc-N:4
					G	269	247	Fc-N:5
					P	270	248	Fc-N:6
					S	271	249	Fc-N:7
					V	272	250	Fc-N:8
					F	273	251	Fc-N:9
					L	274	252	Fc-N:10
					F	275	253	Fc-N:11
					P	276	254	Fc-N:12
					P	277	255	Fc-N:13
					-	277.1	255.1	Fc-N:14
					K	278	256	Fc-N:15
					P	279	257	Fc-N:16
					K	280	258	Fc-N:17
					-	280.1	258.1	Fc-N:18
					D	281	259	Fc-N:19
					T	282	260	Fc-N:20
					L	283	261	Fc-N:21
					M	284	262	Fc-N:22
					I	285	263	Fc-N:23
					S	286	264	Fc-N:24
					R	287	265	Fc-N:25
					T	288	266	Fc-N:26
					P	289	267	Fc-N:27
					E	290	268	Fc-N:28
					V	291	269	Fc-N:29
					T	292	270	Fc-N:30
					C	293	271	Fc-N:31
					V	294	272	Fc-N:32
					V	295	273	Fc-N:33
					V	296	274	Fc-N:34
					D	297	275	Fc-N:35
					V	298	276	Fc-N:36
					S	299	277	Fc-N:37
					H	300	278	Fc-N:38
					E	301	279	Fc-N:39
					D	302	280	Fc-N:40
					P	303	281	Fc-N:41
					E	304	282	Fc-N:42
					V	305	283	Fc-N:43
					K	306	284	Fc-N:44
					F	307	285	Fc-N:45
					N	308	286	Fc-N:46
					W	309	287	Fc-N:47
					-	309.1	287.1	Fc-N:48
					Y	310	288	Fc-N:49
					V	311	289	Fc-N:50
					D	312	290	Fc-N:51
					G	313	291	Fc-N:52
					V	314	292	Fc-N:53
					E	315	293	Fc-N:54
					-	315.1	293.1	Fc-N:55
					-	315.2	293.2	Fc-N:56
					V	316	294	Fc-N:57
					H	317	295	Fc-N:58
					N	318	296	Fc-N:59
					A	319	297	Fc-N:60
					K	320	298	Fc-N:61
					T	321	299	Fc-N:62
					K	322	300	Fc-N:63
					P	323	301	Fc-N:64
					R	324	302	Fc-N:65
					E	325	303	Fc-N:66
					E	326	304	Fc-N:67
					Q	327	305	Fc-N:68
					-	327.1	305.1	Fc-N:69
					-	327.2	305.2	Fc-N:70
					-	327.3	305.3	Fc-N:71
					-	327.4	305.4	Fc-N:72
					Y	328	306	Fc-N:73
					N	329	307	Fc-N:74
					S	330	308	Fc-N:75
					T	331	309	Fc-N:76
					Y	332	310	Fc-N:77
					R	333	311	Fc-N:78
					V	334	312	Fc-N:79
					V	335	313	Fc-N:80
					S	336	314	Fc-N:81
					V	337	315	Fc-N:82
					L	338	316	Fc-N:83
					T	339	317	Fc-N:84
					V	340	318	Fc-N:85
					L	341	319	Fc-N:86
					H	342	320	Fc-N:87
					Q	343	321	Fc-N:88
					D	344	322	Fc-N:89
					W	345	323	Fc-N:90
					-	345.1	323.1	Fc-N:91
					L	346	324	Fc-N:92
					N	347	325	Fc-N:93
					G	348	326	Fc-N:94
					K	349	327	Fc-N:95
					E	350	328	Fc-N:96
					-	350.1	328.1	Fc-N:97
					-	350.2	328.2	Fc-N:98
					Y	351	329	Fc-N:99
					K	352	330	Fc-N:100
					C	353	331	Fc-N:101
					K	354	332	Fc-N:102
					V	355	333	Fc-N:103
					S	356	334	Fc-N:104
					N	357	335	Fc-N:105
					K	358	336	Fc-N:106
					A	359	337	Fc-N:107
					L	360	338	Fc-N:108
					P	361	339	Fc-N:109
					-	361.1	339.1	Fc-N:110
					-	361.2	339.2	Fc-N:111
					A	362	340	Fc-N:112
					P	363	341	Fc-N:113
					I	364	342	Fc-N:114
					E	365	343	Fc-N:115
					K	366	344	Fc-N:116
					T	367	345	Fc-N:117
					I	368	346	Fc-N:118
					S	369	347	Fc-N:119
					K	370	348	Fc-N:120
					A	371	349	Fc-N:121
					K	372	350	Fc-N:122
					G	373	351	Fc-N:123
					-	373.1	351.1	Fc-C:1
					Q	374	352	Fc-C:2
					P	375	353	Fc-C:3
					R	376	354	Fc-C:4
					E	377	355	Fc-C:5
					P	378	356	Fc-C:6
					Q	379	357	Fc-C:7
					V	380	358	Fc-C:8
					Y	381	359	Fc-C:9
					T	382	360	Fc-C:10
					L	383	361	Fc-C:11
					P	384	362	Fc-C:12
					P	385	363	Fc-C:13
					-	385.1	363.1	Fc-C:14
					S	386	364	Fc-C:15
					R	387	365	Fc-C:16
					D	388	366	Fc-C:17
					-	388.1	366.1	Fc-C:18
					E	389	367	Fc-C:19
					L	390	368	Fc-C:20
					-	390.1	368.1	Fc-C:21
					-	390.2	368.2	Fc-C:22
					T	391	369	Fc-C:23
					K	392	370	Fc-C:24
					N	393	371	Fc-C:25
					Q	394	372	Fc-C:26
					V	395	373	Fc-C:27
					S	396	374	Fc-C:28
					L	397	375	Fc-C:29
					T	398	376	Fc-C:30
					C	399	377	Fc-C:31
					L	400	378	Fc-C:32
					V	401	379	Fc-C:33
					K	402	380	Fc-C:34
					G	403	381	Fc-C:35
					F	404	382	Fc-C:36
					Y	405	383	Fc-C:37
					P	406	384	Fc-C:38
					-	406.1	384.1	Fc-C:39
					-	406.2	384.2	Fc-C:40
					S	407	385	Fc-C:41
					D	408	386	Fc-C:42
					I	409	387	Fc-C:43
					A	410	388	Fc-C:44
					V	411	389	Fc-C:45
					E	412	390	Fc-C:46
					W	413	391	Fc-C:47
					-	413.1	391.1	Fc-C:48
					E	414	392	Fc-C:49
					S	415	393	Fc-C:50
					N	416	394	Fc-C:51
					G	417	395	Fc-C:52
					Q	418	396	Fc-C:53
					P	419	397	Fc-C:54
					-	419.1	397.1	Fc-C:55
					-	419.2	397.2	Fc-C:56
					E	420	398	Fc-C:57
					N	421	399	Fc-C:58
					N	422	400	Fc-C:59
					Y	423	401	Fc-C:60
					K	424	402	Fc-C:61
					T	425	403	Fc-C:62
					T	426	404	Fc-C:63
					P	427	405	Fc-C:64
					P	428	406	Fc-C:65
					V	429	407	Fc-C:66
					L	430	408	Fc-C:67
					D	431	409	Fc-C:68
					-	431.1	409.1	Fc-C:69
					-	431.2	409.2	Fc-C:70
					-	431.3	409.3	Fc-C:71
					-	431.4	409.4	Fc-C:72
					S	432	410	Fc-C:73
					D	433	411	Fc-C:74
					G	434	412	Fc-C:75
					S	435	413	Fc-C:76
					F	436	414	Fc-C:77
					F	437	415	Fc-C:78
					L	438	416	Fc-C:79
					Y	439	417	Fc-C:80
					S	440	418	Fc-C:81
					K	441	419	Fc-C:82
					L	442	420	Fc-C:83
					T	443	421	Fc-C:84
					V	444	422	Fc-C:85
					D	445	423	Fc-C:86
					K	446	424	Fc-C:87
					S	447	425	Fc-C:88
					R	448	426	Fc-C:89
					W	449	427	Fc-C:90
					-	449.1	427.1	Fc-C:91
					Q	450	428	Fc-C:92
					Q	451	429	Fc-C:93
					G	452	430	Fc-C:94
					N	453	431	Fc-C:95
					V	454	432	Fc-C:96
					-	454.1	432.1	Fc-C:97
					-	454.2	432.2	Fc-C:98
					F	455	433	Fc-C:99
					S	456	434	Fc-C:100
					C	457	435	Fc-C:101
					S	458	436	Fc-C:102
					V	459	437	Fc-C:103
					L	460	438	Fc-C:104
					H	461	439	Fc-C:105
					E	462	440	Fc-C:106
					A	463	441	Fc-C:107
					L	464	442	Fc-C:108
					H	465	443	Fc-C:109
					-	465.1	443.1	Fc-C:110
					-	465.2	443.2	Fc-C:111
					S	466	444	Fc-C:112
					H	467	445	Fc-C:113
					Y	468	446	Fc-C:114
					T	469	447	Fc-C:115
					-	469.1	447.1	Fc-C:116
					Q	470	448	Fc-C:117
					K	471	449	Fc-C:118
					S	472	450	Fc-C:119
					L	473	451	Fc-C:120
					S	474	452	Fc-C:121
					L	475	453	Fc-C:122
					S	476	454	Fc-C:123
					P	477	455	HCnst-Po:1
					G	478	456	HCnst-Po:2
					K	479	457	HCnst-Po:3
					-	479.1	457.1	HCnst-Po:4
					-	479.2	457.2	HCnst-Po:5
					-	479.3	457.3	HCnst-Po:6
					-	479.4	457.4	HCnst-Po:7
					-	479.5	457.5	HCnst-Po:8
					-	479.6	457.6	HCnst-Po:9
					-	479.7	457.7	HCnst-Po:10
					-	479.8	457.8	HCnst-Po:11
					-	479.9	457.9	HCnst-Po:12
					-	479.10	457.10	HCnst-Po:13
					-	479.11	457.11	HCnst-Po:14
					-	479.12	457.12	HCnst-Po:15
					-	479.13	457.13	HCnst-Po:16
					-	479.14	457.14	HCnst-Po:17
					-	479.15	457.15	HCnst-Po:18
					-	479.16	457.16	HCnst-Po:19
					-	479.17	457.17	HCnst-Po:20
					-	479.18	457.18	HCnst-Po:21
					-	479.19	457.19	HCnst-Po:22
					-	479.20	457.20	HCnst-Po:23
					-	479.21	457.21	HCnst-Po:24
					-	479.22	457.22	HCnst-Po:25
					-	479.23	457.23	HCnst-Po:26
					-	479.24	457.24	HCnst-Po:27
					-	479.25	457.25	HCnst-Po:28
					-	479.26	457.26	HCnst-Po:29
					-	479.27	457.27	HCnst-Po:30
					-	479.28	457.28	HCnst-Po:31
					-	479.29	457.29	HCnst-Po:32
					-	479.30	457.30	HCnst-Po:33
					-	479.31	457.31	HCnst-Po:34
					-	479.32	457.32	HCnst-Po:35
					-	479.33	457.33	HCnst-Po:36
					-	479.34	457.34	HCnst-Po:37
					-	479.35	457.35	HCnst-Po:38
					-	479.36	457.36	HCnst-Po:39
					-	479.37	457.37	HCnst-Po:40
					-	479.38	457.38	HCnst-Po:41
					-	479.39	457.39	HCnst-Po:42
					-	479.40	457.40	HCnst-Po:43
					-	479.41	457.41	HCnst-Po:44
					-	479.42	457.42	HCnst-Po:45
					-	479.43	457.43	HCnst-Po:46
					-	479.44	457.44	HCnst-Po:47
					-	479.45	457.45	HCnst-Po:48
					-	479.46	457.46	HCnst-Po:49
					-	479.47	457.47	HCnst-Po:50
					-	479.48	457.48	HCnst-Po:51
					-	479.49	457.49	HCnst-Po:52
					-	479.50	457.50	HCnst-Po:53
					-	479.51	457.51	HCnst-Po:54
					-	479.52	457.52	HCnst-Po:55
					-	479.53	457.53	HCnst-Po:56
					-	479.54	457.54	HCnst-Po:57
					-	479.55	457.55	HCnst-Po:58
					-	479.56	457.56	HCnst-Po:59
					-	479.57	457.57	HCnst-Po:60
					-	479.58	457.58	HCnst-Po:61
					-	479.59	457.59	HCnst-Po:62
					-	479.60	457.60	HCnst-Po:63
					-	479.61	457.61	HCnst-Po:64
					-	479.62	457.62	HCnst-Po:65
					-	479.63	457.63	HCnst-Po:66
					-	479.64	457.64	HCnst-Po:67
					-	479.65	457.65	HCnst-Po:68
					-	479.66	457.66	HCnst-Po:69
					-	479.67	457.67	HCnst-Po:70
					-	479.68	457.68	HCnst-Po:71
					-	479.69	457.69	HCnst-Po:72
					-	479.70	457.70	HCnst-Po:73
					-	479.71	457.71	HCnst-Po:74
					-	479.72	457.72	HCnst-Po:75
					-	479.73	457.73	HCnst-Po:76
					-	479.74	457.74	HCnst-Po:77
					-	479.75	457.75	HCnst-Po:78
					-	479.76	457.76	HCnst-Po:79
					-	479.77	457.77	HCnst-Po:80
					-	479.78	457.78	HCnst-Po:81
					-	479.79	457.79	HCnst-Po:82
					-	479.80	457.80	HCnst-Po:83
					-	479.81	457.81	HCnst-Po:84
					-	479.82	457.82	HCnst-Po:85
					-	479.83	457.83	HCnst-Po:86
					-	479.84	457.84	HCnst-Po:87
					-	479.85	457.85	HCnst-Po:88
					-	479.86	457.86	HCnst-Po:89
					-	479.87	457.87	HCnst-Po:90
					-	479.88	457.88	HCnst-Po:91
					-	479.89	457.89	HCnst-Po:92
					-	479.90	457.90	HCnst-Po:93
					-	479.91	457.91	HCnst-Po:94
					-	479.92	457.92	HCnst-Po:95
					-	479.93	457.93	HCnst-Po:96
					-	479.94	457.94	HCnst-Po:97
					-	479.95	457.95	HCnst-Po:98
					-	479.96	457.96	HCnst-Po:99
					-	479.97	457.97	HCnst-Po:100
					-	479.98	457.98	HCnst-Po:101
					-	479.99	457.99	HCnst-Po:102
					-	479.100	457.100	HCnst-Po:103
					-	479.101	457.101	HCnst-Po:104
					-	479.102	457.102	HCnst-Po:105
					-	479.103	457.103	HCnst-Po:106
					-	479.104	457.104	HCnst-Po:107
					-	479.105	457.105	HCnst-Po:108
					-	479.106	457.106	HCnst-Po:109
					-	479.107	457.107	HCnst-Po:110
					-	479.108	457.108	HCnst-Po:111
					-	479.109	457.109	HCnst-Po:112
					-	479.110	457.110	HCnst-Po:113
					-	479.111	457.111	HCnst-Po:114
					-	479.112	457.112	HCnst-Po:115
					-	479.113	457.113	HCnst-Po:116
					-	479.114	457.114	HCnst-Po:117
					-	479.115	457.115	HCnst-Po:118
					-	479.116	457.116	HCnst-Po:119
					-	479.117	457.117	HCnst-Po:120
					-	479.118	457.118	HCnst-Po:121
					-	479.119	457.119	HCnst-Po:122
					-	479.120	457.120	HCnst-Po:123
