# Supplementary material for: An antibody drug engineered for prevention of malaria in global populations
Source: Research Square preprint supplement (doi:10.21203/rs.3.rs-2678519/v1), 2023-04-04
Supplement: Supplementary file 3 [file 671935437b2f004a50b67885.xlsx]

## Sheet: Supplementary Table 3
Supplementary Table 3 | Binding and in vivo pharmacology of lead mAbs
	Binding contstants (surface plasmon resonance)							Liver burden inhibition				Liver burden mAb sera concentration				Bite parasitaemia vs. negative controlc					Bite parasitaemia vs. AB-000317c					Bite parasitaemia mAb sera concentration
mAb ID	KD CSP (nM)	KD NANP6 (nM)	KD NPNA3 (nM)	KD NVDP3NANP2 (nM)	KD NANPNVDPNANP (nM)	KD Junction (nM)		Inhibition (%)	AB-000317 normalized (%)a	Comparison to AB-000317b		[mAb]sera / KDCSP-SPR	[mAb]sera, avg. (µg/ml)	[mAb]sera, avg. (M)		HR	95% CI	HR, replicate	95% CI, replicate		HR	95% CI	HR, replicate	95% CI, replicate		[mAb]sera / KDCSP-SPR	[mAb]sera, avg. (µg/ml)	[mAb]sera, avg. (M)		SHM (H+L)	IGHV	IGKV/IGLV	Vaccinee ID	Trial dose arm	P3D CHMI Protection	Sample of PB clone	Lineage
AB-007104	0.057394	0.0366	0.617044	0.115539	0.56706	7112.79		88.9125	95.4611	Comparable, p>0.05		4818.16	41.48	2.76533e-07		0.09697	0.012, 0.81				3.51	0.98, 13				7809.18	67.23	4.482e-07		26	IGHV3-33	IGKV2-30	22	Fx017	P	P3D	IGHV3-33/16/IGKV2-30/9/0
AB-007088	0.214815	0.236	4.68141	1.97153	NA	251.93		83.4786	94.1192	Comparable, p>0.05		1429.45	46.06	3.07067e-07		0.015	0.0017, 0.14	0.015	0.0017, 0.14		0.64	0.10, 4.1	0.61	0.097, 3.8		2320.14	74.76	4.984e-07		32	IGHV3-33	IGKV1-5	14	Fx017	P	P3D	IGHV3-33/17/IGKV1-5/11/0
AB-007103	0.0209652	0.0442	1.70459	0.43751	412.74	NA		82.5439	88.6235	Worse, p<0.05		18856.6	59.3	3.95333e-07																29	IGHV3-33	IGKV2-30	22	Fx017	P	P3D	IGHV3-33/16/IGKV2-30/9/0
AB-000224	0.0365976	0.0994	4.52629	1.6812	1422.36	NA		97.3293	101.909	Better, p<0.05		9938.72	54.56	3.63733e-07		0.015	0.0017, 0.14				0.42	0.097, 1.8	0.7415	0.15, 3.8		13066.4	71.73	4.782e-07		41	IGHV3-49	IGLV1-40	26	Fx017	P	P3D	IGHV3-49/19/IGLV1-40/12/0
AB-000399	0.324643	1.35413	978.521	223.053	3003.25	NA		95.701	100.204	Comparable, p>0.05		864.54	42.1	2.80667e-07		0.04979	0.0062, 0.40				4.28	1.1, 16				1248.14	60.78	4.052e-07		28	IGHV3-49	IGKV2D-29	5	Fx017	P	P3D	IGHV3-49/13/IGKV2D-29/10/0
AB-007114	0.0867036	3.12832	0.137393	3.23776	7853.44	NA		97.5375	102.127	Comparable, p>0.05		3386.25	44.04	2.936e-07		0.07244	0.0091, 0.58	0.02866	0.0038, 0.22		1.28	0.37, 4.5	2.31	0.40, 13		5969.76	77.64	5.176e-07		31	IGHV3-49	IGLV1-40	26	Fx017	P	P3D	IGHV3-49/19/IGLV1-40/12/0
AB-001529	0.227681	0.313	475.232	808.614	NA	NA		69.7591	73.0416	Worse, p<0.05		1564.18	53.42	3.56133e-07																17	IGHV3-33	IGKV1-5	52	Fx017	P	P3D	IGHV3-33/17/IGKV1-5/9/2
AB-000364	0.0302587	0.637377	2.55134	0.772057	7.12391	3291.89		95.8397	100.349	Comparable, p>0.05		10571	47.98	3.19867e-07		0.09697	0.012, 0.81				3.11	0.86, 11				17138.8	77.79	5.186e-07		27	IGHV3-33	IGKV1-5	29	Fx017	P	P3D	IGHV3-33/13/IGKV1-5/9/0
AB-001480	0.51769	3.18403	223.457	9.87371	5054.6	21631.7		56.226	59.5208	Worse, p<0.05		738.923	57.38	3.82533e-07																15	IGHV3-33	IGKV1-5	201	012M	P	P3D	IGHV3-33/17/IGKV1-5/9/1
AB-007176	0.0493668	0.0388	0.261142	0.0396795	0.38909	2367		94.3186	101.299	Comparable, p>0.05		7708.29	57.08	3.80533e-07																31	IGHV3-33	IGLV1-40	63	Fx017	P	P3D	IGHV3-33/15/IGLV1-40/13/0
AB-000317	0.0543855	1.28596	8.03514	2747.03	14387.2	NA		92.6946	NA	NA		8742.95	71.3235	4.7549e-07		0.015	0.0017, 0.14	0.015	0.0017, 0.14							11774.3	96.053	6.40353e-07		31	IGHV3-30	IGKV1-5	29	Fx017	P	P3D	IGHV3-30/13/IGKV1-5/10/0
AB-007131	0.0534936	0.592545	1.37018	0.640869	6.96868	NA		91.7551	98.5455	Comparable, p>0.05		6936.66	55.66	3.71067e-07																36	IGHV3-33	IGKV3-15	39	Fx017	P	P3D	IGHV3-33/15/IGKV3-15/9/0
AB-007101	0.838631	0.117	1.84047	1.16355	25.1239	31258.7		88.2943	94.8285	Comparable, p>0.05		453.915	57.1	3.80667e-07																33	IGHV3-33	IGKV3-11	203	012M	P	P4D	IGHV3-33/15/IGKV3-11/9/0
AB-007161	1.18982	6.49	3391.61	82.3109	9445.25	20727.4		85.1133	91.4121	Comparable, p>0.05		321.728	57.42	3.828e-07																27	IGHV3-49	IGKV2D-29	5	Fx017	P	P3D	IGHV3-49/13/IGKV2D-29/10/0
AB-007121	0.0259449	0.0757	0.897283	0.374066	1.31865	543.383		80.3207	86.2648	Worse, p<0.05		12303	47.88	3.192e-07																34	IGHV3-30	IGKV2-24	38	Fx017	P	P3D	IGHV3-30/16/IGKV2-24/9/0
AB-007173	0.0530513	0.603	110.927	9.34717	19440.6	8379.9		44.1037	47.3676	Worse, p<0.05		6695.41	53.28	3.552e-07																23	IGHV3-33	IGLV1-40	63	Fx017	P	P3D	IGHV3-33/15/IGLV1-40/13/0
AB-007154	0.0267465	0.787378	16.5012	0.898609	3.12437	5485.64		89.9867	95.3285	Comparable, p>0.05		14511.6	58.22	3.88133e-07		0.04979	0.0062, 0.40				3.15	0.71, 14				22697.1	91.06	6.07067e-07		30	IGHV3-33	IGKV1-5	5	Fx017	P	P4D	IGHV3-33/18/IGKV1-5/9/1
AB-007083	0.140687	0.0659	2.08442	1.25808	1.91307	940.121		88.4997	93.7532	Comparable, p>0.05		2290.67	48.34	3.22267e-07																45	IGHV3-33	IGKV1-5	14	Fx017	P	P4D	IGHV3-33/17/IGKV1-5/11/0
AB-001558	1.04864	0.323	1741.91	5.31561	2031.43	6818.6		86.1395	90.8968	Worse, p<0.05		370.51	58.28	3.88533e-07																12	IGHV3-33	IGKV3-15	209	012M	P	P3D	IGHV3-33/18/IGKV3-15/9/0
AB-001387	0.373705	1.87	4012.07	12.4327	NA	NA		48.2095	53.3207	Worse, p<0.05		1183.82	66.36	4.424e-07																5	IGHV3-33	IGLV1-40	236	012M	P	P3D	IGHV3-33/18/IGLV1-40/12/0
AB-007163	0.010702	0.0771	0.043573	0.32243	0.368857	31.6951		88.7291	98.6781	Comparable, p>0.05		38759	62.22	4.148e-07		0.0302	0.0036, 0.25				1.97	0.50, 7.8				65420.7	105.02	7.00133e-07		56	IGHV3-33	IGLV1-40	53	Fx017	P	P4D	IGHV3-33/18/IGLV1-40/12/0
AB-007087	0.0653217	0.0986	4.43332	0.515099	0.636557	505.256		85.5889	90.6697	Worse, p<0.05		2824.99	27.68	1.84533e-07																29	IGHV3-33	IGKV1-5	14	Fx017	P	P3D	IGHV3-33/17/IGKV1-5/11/0
AB-000397	0.0645888	0.126	43.3719	7792.4	15356.2	NA		70.9088	76.3286	Worse, p<0.05		ND	ND	ND																27	IGHV3-15	IGKV2-28	46	Fx017	P	P3D	IGHV3-15/13/IGKV2-28/10/0
AB-001428	0.58661	0.38	833.587	8.30343	7617.94	24441.4		61.9891	68.9398	Worse, p<0.05		305.484	26.88	1.792e-07																9	IGHV3-33	IGKV1-5	209	012M	P	P3D	IGHV3-33/17/IGKV1-5/9/0
AB-007178	0.119668	0.533407	3.41997	5.46953	63.7265	29473.7		83.8379	88.8147	Worse, p<0.05		2967.09	53.26	3.55067e-07																25	IGHV3-33	IGKV3-15	63	Fx017	P	P3D	IGHV3-33/18/IGKV3-15/9/0
AB-000391	0.116399	0.076	0.963444	NA	NA	NA		75.8682	81.6671	Worse, p<0.05		ND	ND	ND																38	IGHV3-48	IGKV2-30	38	Fx017	P	P3D	IGHV3-48/16/IGKV2-30/10/0
AB-007120	0.165618	0.690588	86.8301	10.1575	5266.69	14828.7		57.6482	62.0544	Worse, p<0.05		ND	ND	ND																22	IGHV3-30	IGKV2-24	38	Fx017	P	P3D	IGHV3-30/16/IGKV2-24/9/0
AB-007110	0.0419667	0.0726	2.12527	1.2166	313.818	41868.8		94.1771	101.955	Comparable, p>0.05		7917.38	49.84	3.32267e-07		0.04979	0.0062, 0.40	0.0302	0.0036, 0.25		0.37	0.050, 2.7	1.16	0.31, 4.3		10913.4	68.7	4.58e-07		32	IGHV3-49	IGLV1-40	26	Fx017	P	P3D	IGHV3-49/19/IGLV1-40/12/0
AB-000334	0.57549	0.749	31.4909	0.657958	0.849817	165.592		91.8573	96.1796	Comparable, p>0.05		604.471	52.18	3.47867e-07		0.04979	0.0062, 0.40				3.31	0.77, 14				893.037	77.09	5.13933e-07		27	IGHV3-33	IGKV1-5	14	Fx017	P	P3D	IGHV3-33/17/IGKV1-5/11/0
AB-007096	0.204494	0.133	8.21554	6.58954	841.229	NA		84.1875	89.1208	Worse, p<0.05		1917.58	58.82	3.92133e-07																29	IGHV3-33	IGKV3-11	203	012M	P	P4D	IGHV3-33/15/IGKV3-11/9/0
AB-007123	0.217114	7.57291	1.54968	0.609907	1.11848	414.763		81.0766	87.7724	Worse, p<0.05		1850.34	60.26	4.01733e-07																22	IGHV3-30	IGKV2-24	38	Fx017	P	P3D	IGHV3-30/16/IGKV2-24/9/0
AB-001472	0.976817	0.156	1376.19	2006.69	NA	NA		78.9672	83.3284	Worse, p<0.05		402.942	59.04	3.936e-07																6	IGHV3-33	IGKV1-5	233	012M	P	P3D	IGHV3-33/19/IGKV1-5/9/2
AB-007182	0.158135	0.645185	1103.39	2.8142	1704.12	60517.1		56.3775	62.699	Worse, p<0.05		2353.27	55.82	3.72133e-07																26	IGHV3-33	IGKV1-5	63	Fx017	P	P3D	IGHV3-33/19/IGKV1-5/9/0
AB-001554	0.515426	0.231	224.051	948.605	NA	NA		51.1166	56.8482	Worse, p<0.05		198.671	15.36	1.024e-07																7	IGHV3-33	IGKV2-30	216	012M	P	P3D	IGHV3-33/18/IGKV2-30/10/0
AB-007130	0.200652	0.0447	0.663447	0.32541	3.33519	4043.05		92.1958	97.6687	Comparable, p>0.05		1859.28	55.96	3.73067e-07		0.015	0.0017, 0.14				0.12	0.0070, 2.1				3013.85	90.71	6.04733e-07		39	IGHV3-33	IGKV3-15	39	Fx017	P	P3D	IGHV3-33/15/IGKV3-15/9/0
AB-007168	0.039751	0.586727	1.9089	0.268174	1.28514	249.34		86.7665	96.4955	Comparable, p>0.05		9022.82	53.8	3.58667e-07		0.1225	0.014, 1.1				5.08	1.3, 20				11962.8	71.33	4.75533e-07		29	IGHV3-33	IGLV1-40	53	Fx017	P	P3D	IGHV3-33/18/IGLV1-40/12/0
AB-000356	0.244168	0.111	1.93247	4.59203	1305.13	NA		86.516	91.5858	Worse, p<0.05		1655.69	60.64	4.04267e-07																35	IGHV3-33	IGKV3-15	52	Fx017	P	P3D	IGHV3-33/18/IGKV3-15/9/0
AB-007150	0.0188017	0.0511	9.62882	338.419	298.429	4654.12		84.376	95.1733	Comparable, p>0.05		19835.1	55.94	3.72933e-07		0.04979	0.0062, 0.40				0.97	0.27, 3.5				29649.9	83.62	5.57467e-07		27	IGHV3-15	IGKV2-28	46	Fx017	P	P3D	IGHV3-15/13/IGKV2-28/10/0
AB-001455	0.286463	0.0615	6.93782	13.5511	NA	NA		82.0763	88.3497	Worse, p<0.05		ND	ND	ND																14	IGHV3-33	IGKV2-30	216	012M	P	P3D	IGHV3-33/16/IGKV2-30/9/0
AB-007175	0.0327848	0.0281	2.16005	0.79231	12.2517	970.881		77.9761	86.7194	Worse, p<0.05		10935.9	53.78	3.58533e-07																21	IGHV3-33	IGLV1-40	63	Fx017	P	P3D	IGHV3-33/15/IGLV1-40/13/0
AB-000373	0.170555	0.0316	4.09392	0.934244	19.4141	11165		75.516	83.5222	Worse, p<0.05		2191.28	56.06	3.73733e-07																27	IGHV3-33	IGKV2-29	34	Fx017	P	P3D	IGHV3-33/14/IGKV2-29/9/0
AB-001533	0.0749755	0.0613	0.885572	0.433814	2.53848	876.893		72.9256	78.4996	Worse, p<0.05		ND	ND	ND																20	IGHV3-30	IGKV2-24	38	Fx017	P	P3D	IGHV3-30/16/IGKV2-24/9/0
AB-001458	0.250887	0.319	2093.73	101.641	71.9217	NA		50.0657	55.3737	Worse, p<0.05		1866.97	70.26	4.684e-07																10	IGHV3-49	IGKV3-15	236	012M	P	P3D	IGHV3-49/13/IGKV3-15/9/0
AB-000231	0.0224895	0.0414	0.437836	0.2872	0.896694	7.76561		93.3654	103.834	Comparable, p>0.05		6195.48	20.9	1.39333e-07		0.1225	0.014, 1.1	0.1364	0.021, 0.89		2.91	0.81, 10	1.75	0.27, 12		27017	91.14	6.076e-07		35	IGHV3-33	IGLV1-40	63	Fx017	P	P3D	IGHV3-33/15/IGLV1-40/13/0
AB-001396	0.233751	0.279	31.7853	7.08632	337.584	67857.7		91.7153	96.7805	Comparable, p>0.05		1666.16	58.42	3.89467e-07		0.07244	0.0091, 0.58	0.06622	0.0097, 0.45		1.21	0.34, 4.4	3.48	0.64, 19		3171.75	111.21	7.414e-07		10	IGHV3-33	IGKV1-5	229	012M	P	P3D	IGHV3-33/21/IGKV1-5/9/0
AB-007109	0.0836367	0.091	6.38782	1.53793	416.704	NA		90.7051	96.0895	Comparable, p>0.05		3205.93	40.22	2.68133e-07																41	IGHV3-49	IGLV1-40	26	Fx017	P	P3D	IGHV3-49/19/IGLV1-40/12/0
AB-007090	0.156027	0.051	1.7248	1.72849	123.257	27434.9		90.3349	95.6284	Comparable, p>0.05		2856.77	66.86	4.45733e-07		0.04979	0.0062, 0.40				1.74	0.36, 8.3				4151.42	97.16	6.47733e-07		43	IGHV3-33	IGKV3-11	203	012M	P	P4D	IGHV3-33/15/IGKV3-11/9/0
AB-007080	0.227246	0.0255	0.162031	0.483762	8.41844	4310.98		85.8553	90.8863	Comparable, p>0.05		1722.07	58.7	3.91333e-07																43	IGHV3-33	IGKV3-11	14	Fx017	P	P4D	IGHV3-33/16/IGKV3-11/9/0
AB-007102	0.041947	0.0585	150.316	12.4517	NA	NA		74.5345	80.2315	Worse, p<0.05		ND	ND	ND																13	IGHV3-33	IGKV2-30	216	012M	P	P3D	IGHV3-33/16/IGKV2-30/9/0
AB-000376	0.262304	0.192	448.153	14.3844	22452.5	52921.9		56.0747	62.0197	Worse, p<0.05		1401.93	55.16	3.67733e-07																33	IGHV3-33	IGKV1-5	60	Fx017	P	P3D	IGHV3-33/16/IGKV1-5/9/1
AB-007076	0.124169	0.0264	0.0710041	0.0707425	1.1994	1916.09		90.5735	100.176	Comparable, p>0.05		3148.4	58.64	3.90933e-07		0.07244	0.0091, 0.58				3.64	0.78, 17				5094.13	94.88	6.32533e-07		24	IGHV3-33	IGKV3-11	14	Fx017	P	P4D	IGHV3-33/16/IGKV3-11/9/0
AB-007106	0.652562	1.90759	144.329	10.6184	1274.3	NA		83.7144	88.3377	Worse, p<0.05		562.705	55.08	3.672e-07																5	IGHV3-33	IGKV1-5	229	012M	P	P3D	IGHV3-33/21/IGKV1-5/9/0
AB-007107	1.16351	0.132	487.134	539.449	NA	NA		49.3742	52.1011	Worse, p<0.05		337.713	58.94	3.92933e-07																15	IGHV3-33	IGKV1-5	233	012M	P	P4D	IGHV3-33/19/IGKV1-5/9/2
AB-007111	0.0329197	0.228	5.0816	1.85304	1369.92	NA		93.5935	101.323	Comparable, p>0.05		10340.3	51.06	3.404e-07		0.0302	0.0036, 0.25	0.01027	0.0011, 0.094		0.121	0.0070, 2.1	1.79	0.43, 7.5		17734.1	87.57	5.838e-07		24	IGHV3-49	IGLV1-40	26	Fx017	P	P3D	IGHV3-49/19/IGLV1-40/12/0
AB-007159	0.0885806	0.327	525.857	869.272	17870.8	NA		88.9535	96.2998	Comparable, p>0.05		2271.38	30.18	2.012e-07		0.0302	0.0036, 0.25				2.1	0.51, 8.8				1487.16	19.76	1.31733e-07		26	IGHV3-49	IGKV2D-29	5	Fx017	P	P4D	IGHV3-49/13/IGKV2D-29/10/0
AB-007170	0.0240925	0.0313	0.478704	0.16382	0.785565	8411.11		88.143	97.4879	Comparable, p>0.05		17892.1	64.66	4.31067e-07		0.04979	0.0062, 0.40				0.72	0.12, 4.4				21876.8	79.06	5.27067e-07		37	IGHV3-33	IGLV1-40	63	Fx017	P	P3D	IGHV3-33/15/IGLV1-40/13/0
AB-007165	0.0800342	0.187875	0.670811	0.0418663	0.596584	421.347		86.4533	95.6191	Comparable, p>0.05		5637.59	67.68	4.512e-07																37	IGHV3-33	IGLV1-40	53	Fx017	P	P3D	IGHV3-33/18/IGLV1-40/12/0
AB-007115	0.217266	0.361	21.4566	10.1664	73.5582	5736.6		79.8033	86.3939	Worse, p<0.05		1556.93	50.74	3.38267e-07																39	IGHV3-49	IGKV2D-29	3	Fx017	P	P4D	IGHV3-49/14/IGKV2D-29/10/0
AB-007138	0.0667339	0.532026	8.61427	46.2494	105.659	961.55		72.2534	81.4995	Worse, p<0.05		6073.87	60.8	4.05333e-07																41	IGHV3-7	IGKV2D-29	39	Fx017	P	P3D	IGHV3-7/7/IGKV2D-29/10/0
AB-000327	0.0294737	0.0468	10.4453	1.96873	536.024	11545.7		66.2728	73.7038	Worse, p<0.05		5645.71	24.96	1.664e-07																40	IGHV3-33	IGLV1-40	63	Fx017	P	P3D	IGHV3-33/20/IGLV1-40/13/0
AB-007160	0.377881	2.73532	772.953	2352.05	21827	NA		94.9219	99.3885	Comparable, p>0.05		725.801	41.14	2.74267e-07		0.0302	0.0036, 0.25				1.59	0.35, 7.3				1201.08	68.08	4.53867e-07		20	IGHV3-49	IGKV2D-29	5	Fx017	P	P4D	IGHV3-49/13/IGKV2D-29/10/0
AB-007112	0.0884359	0.178	0.214824	1.53848	541.219	NA		92.3319	99.9573	Comparable, p>0.05		3992.35	52.96	3.53067e-07		0.0302	0.0036, 0.25				1.66	0.42, 6.5				6017.92	79.83	5.322e-07		40	IGHV3-49	IGLV1-40	26	Fx017	P	P3D	IGHV3-49/19/IGLV1-40/12/0
AB-007142	0.132583	0.0562	10.6219	304.553	14297	NA		85.6624	92.2099	Worse, p<0.05		ND	ND	ND		0.09697	0.012, 0.81				3.51	0.98, 13				4443.5	88.37	5.89133e-07		26	IGHV3-15	IGKV2-28	46	Fx017	P	P4D	IGHV3-15/13/IGKV2-28/10/0
AB-007126	0.102864	0.0898	0.98114	NA	NA	NA		71.1321	76.5689	Worse, p<0.05		ND	ND	ND																35	IGHV3-48	IGKV2-30	38	Fx017	P	P3D	IGHV3-48/16/IGKV2-30/10/0
AB-007113	0.0436811	2.10995	13.6823	1.32237	1167.26	NA		94.4406	100.047	Comparable, p>0.05		8995.5	58.94	3.92933e-07																30	IGHV3-49	IGLV1-40	26	Fx017	P	P3D	IGHV3-49/19/IGLV1-40/12/0
AB-007108	0.101592	0.249	61.4331	3.22984	10057.7	NA		92.5412	98.0346	Comparable, p>0.05		3618.4	55.14	3.676e-07																18	IGHV3-49	IGLV1-40	26	Fx017	P	P3D	IGHV3-49/19/IGLV1-40/12/0
AB-007118	0.0291951	2.64113	31.8146	63.6994	74.8936	8401.63		91.6315	99.199	Comparable, p>0.05		14418	63.14	4.20933e-07		0.04979	0.0062, 0.40				1.66	0.35, 7.9				18510	81.06	5.404e-07		23	IGHV3-49	IGKV2D-29	3	Fx017	P	P3D	IGHV3-49/14/IGKV2D-29/10/0
AB-007158	0.326896	0.0993	108.508	107.619	1475.75	4127.74		85.1407	92.1721	Worse, p<0.05		643.223	31.54	2.10267e-07																37	IGHV3-49	IGKV2D-29	5	Fx017	P	P4D	IGHV3-49/13/IGKV2D-29/10/0
AB-007169	0.0174783	0.0529	0.973379	0.617724	1.46851	1274.85		93.2602	103.148	Comparable, p>0.05		25685.2	67.34	4.48933e-07		0.04979	0.0062, 0.40				1.58	0.24, 10				40358.6	105.81	7.054e-07		40	IGHV3-33	IGLV1-40	53	Fx017	P	P3D	IGHV3-33/18/IGLV1-40/12/0
AB-007139	0.0296525	0.133	4.52184	133.45	99.4015	2531.75		73.0802	82.432	Worse, p<0.05		12666.7	56.34	3.756e-07																35	IGHV3-7	IGKV2D-29	39	Fx017	P	P3D	IGHV3-7/7/IGKV2D-29/10/0
AB-000394	0.10991	0.0394	0.277755	0.301011	0.505297	5094.31																								30	IGHV3-33	IGKV3-11	14	Fx017	P	P3D	IGHV3-33/16/IGKV3-11/9/0
AB-007075	0.105941	0.130511	0.22747	0.619287	1.59872	NA																								36	IGHV3-33	IGKV3-11	14	Fx017	P	P4D	IGHV3-33/16/IGKV3-11/9/0
AB-007077	0.236207	0.267208	0.325539	0.5908	2.40826	NA																								28	IGHV3-33	IGKV3-11	14	Fx017	P	P4D	IGHV3-33/16/IGKV3-11/9/0
AB-007078	0.158647	0.0519	0.686175	1.7344	235.386	34956.2																								21	IGHV3-33	IGKV3-11	14	Fx017	P	P4D	IGHV3-33/16/IGKV3-11/9/0
AB-007079	0.224704	0.057	0.450513	0.587635	24.6723	NA																								33	IGHV3-33	IGKV3-11	14	Fx017	P	P4D	IGHV3-33/16/IGKV3-11/9/0
AB-007081	0.150284	0.028	0.251382	0.0373645	0.838248	11033																								28	IGHV3-33	IGKV3-11	14	Fx017	P	P3D	IGHV3-33/16/IGKV3-11/9/0
AB-007082	0.135408	0.0188	0.989571	1.45055	15.4185	36310.2																								26	IGHV3-33	IGKV3-11	14	Fx017	P	P3D	IGHV3-33/16/IGKV3-11/9/0
AB-007084	0.0800051	0.343363	2.28733	1.23443	1.35556	94.4465																								37	IGHV3-33	IGKV1-5	14	Fx017	P	P4D	IGHV3-33/17/IGKV1-5/11/0
AB-007085	0.0503999	0.123	6.44256	3.10212	18.9261	937.013																								17	IGHV3-33	IGKV1-5	14	Fx017	P	P4D	IGHV3-33/17/IGKV1-5/11/0
AB-007086	0.161374	0.224	7.08228	1.2215	10.4228	126.045																								34	IGHV3-33	IGKV1-5	14	Fx017	P	P3D	IGHV3-33/17/IGKV1-5/11/0
AB-001545	1.70836	43.6	2496.46	NA	NA	NA																								0	IGHV3-33	IGKV3-11	203	012M	P	P3D	IGHV3-33/15/IGKV3-11/9/0
AB-007089	0.155279	0.738	10.4429	4.45707	2141.83	NA																								25	IGHV3-33	IGKV3-11	203	012M	P	P4D	IGHV3-33/15/IGKV3-11/9/0
AB-007091	1.88483	1.43	2258.71	602.216	NA	NA																								36	IGHV3-33	IGKV3-11	203	012M	P	P4D	IGHV3-33/15/IGKV3-11/9/0
AB-007092	9.7496	36.1	11568.5	NA	NA	NA																								28	IGHV3-33	IGKV3-11	203	012M	P	P4D	IGHV3-33/15/IGKV3-11/9/0
AB-007093	0.366583	0.0775	0.821238	1.80566	152.162	25646.2																								28	IGHV3-33	IGKV3-11	203	012M	P	P4D	IGHV3-33/15/IGKV3-11/9/0
AB-007094	1.35717	1.44	281.204	169.471	NA	NA																								11	IGHV3-33	IGKV3-11	203	012M	P	P4D	IGHV3-33/15/IGKV3-11/9/0
AB-007095	1.50232	0.599	40.4173	50.4406	NA	NA																								32	IGHV3-33	IGKV3-11	203	012M	P	P4D	IGHV3-33/15/IGKV3-11/9/0
AB-007097	0.653634	0.388	72.236	27.3521	2039.68	NA																								32	IGHV3-33	IGKV3-11	203	012M	P	P4D	IGHV3-33/15/IGKV3-11/9/0
AB-007098	1.55022	0.137	15.6442	144.66	NA	NA																								28	IGHV3-33	IGKV3-11	203	012M	P	P4D	IGHV3-33/15/IGKV3-11/9/0
AB-007099	0.555027	0.114	8.84761	10.0427	4414.44	NA																								32	IGHV3-33	IGKV3-11	203	012M	P	P4D	IGHV3-33/15/IGKV3-11/9/0
AB-007100	0.171517	1.38	394.679	219.688	NA	NA																								14	IGHV3-33	IGKV3-11	203	012M	P	P4D	IGHV3-33/15/IGKV3-11/9/0
AB-007184	0.13705	0.13	6.99312	1.2055	688.223	NA																								25	IGHV3-33	IGKV3-11	203	012M	P	P4D	IGHV3-33/15/IGKV3-11/9/0
AB-001511	1.22995	1.97	388.587	105.426	NA	NA																								4	IGHV3-33	IGKV2-30	229	012M	P	P3D	IGHV3-33/16/IGKV2-30/9/0
AB-001578	1.00283	3.05891	438.126	355.029	19684.6	NA																								8	IGHV3-33	IGKV3-11	229	012M	P	P3D	IGHV3-33/18/IGKV3-11/10/0
AB-007105	1.49202	3.96678	95.7331	325.778	NA	88900.3																								6	IGHV3-33	IGKV3-11	229	012M	P	P3D	IGHV3-33/18/IGKV3-11/10/0
AB-007116	0.577593	13.9	3131.25	1155.38	10216.6	9390.56																								23	IGHV3-49	IGKV2D-29	3	Fx017	P	P3D	IGHV3-49/14/IGKV2D-29/10/0
AB-007117	2.77041	42.1	8335.95	NA	NA	NA																								0	IGHV3-49	IGKV2D-29	3	Fx017	P	P3D	IGHV3-49/14/IGKV2D-29/10/0
AB-007119	0.222672	0.0206	4.60308	0.504838	14.2724	NA																								14	IGHV3-33	IGKV2-29	34	Fx017	P	P3D	IGHV3-33/14/IGKV2-29/9/0
AB-007122	0.022263	1.10455	5.32609	0.684956	15.0959	2179.81																								22	IGHV3-30	IGKV2-24	38	Fx017	P	P3D	IGHV3-30/16/IGKV2-24/9/0
AB-007124	0.0278045	0.467559	34.0431	1.36008	275.458	6370.82																								17	IGHV3-30	IGKV2-24	38	Fx017	P	P3D	IGHV3-30/16/IGKV2-24/9/0
AB-007125	1.30946	0.205	1418.01	NA	NA	NA																								11	IGHV3-48	IGKV2-30	38	Fx017	P	P3D	IGHV3-48/16/IGKV2-30/10/0
AB-007127	0.102831	0.0962	2.32795	NA	NA	NA																								32	IGHV3-48	IGKV2-30	38	Fx017	P	P3D	IGHV3-48/16/IGKV2-30/10/0
AB-007128	0.0565579	0.798716	1.18957	NA	NA	NA																								22	IGHV3-48	IGKV2-30	38	Fx017	P	P3D	IGHV3-48/16/IGKV2-30/10/0
AB-000325	0.138692	0.086	0.885362	0.604779	11.1857	NA																								35	IGHV3-33	IGKV3-15	39	Fx017	P	P3D	IGHV3-33/15/IGKV3-15/9/0
AB-007129	7.48345	12.6	NA	NA	NA	NA																								14	IGHV3-33	IGKV3-15	39	Fx017	P	P3D	IGHV3-33/15/IGKV3-15/9/0
AB-007132	0.171503	0.0733	6.93979	1.77775	210.983	NA																								27	IGHV3-33	IGKV3-15	39	Fx017	P	P3D	IGHV3-33/15/IGKV3-15/9/0
AB-007133	0.217619	0.5671	634.919	1.01836	404.147	NA																								31	IGHV3-33	IGKV3-15	39	Fx017	P	P3D	IGHV3-33/15/IGKV3-15/9/0
AB-007134	0.320572	1.5	4915.73	130.331	NA	NA																								23	IGHV3-33	IGKV3-15	39	Fx017	P	P3D	IGHV3-33/15/IGKV3-15/9/0
AB-007136	0.349746	1.61	501.787	1974.12	NA	NA																								31	IGHV3-33	IGKV3-15	39	Fx017	P	P3D	IGHV3-33/15/IGKV3-15/9/0
AB-007137	0.622577	2.13078	2995	523.947	NA	NA																								32	IGHV3-33	IGKV3-15	39	Fx017	P	P3D	IGHV3-33/15/IGKV3-15/9/0
AB-007185	0.0749217	0.577067	5.69597	1.56151	5011.07	NA																								31	IGHV3-33	IGKV3-15	39	Fx017	P	P3D	IGHV3-33/15/IGKV3-15/9/0
AB-007186	0.0287314	0.039	1.49013	0.814779	105.694	NA																								43	IGHV3-33	IGKV3-15	39	Fx017	P	P3D	IGHV3-33/15/IGKV3-15/9/0
AB-007140	1.79944	1.80298	793.971	NA	NA	NA																								37	IGHV3-7	IGKV2D-29	39	Fx017	P	P3D	IGHV3-7/7/IGKV2D-29/10/0
AB-007141	0.761537	1.42425	62.8929	13338.7	15953.3	21358.8																								35	IGHV3-7	IGKV2D-29	39	Fx017	P	P3D	IGHV3-7/7/IGKV2D-29/10/0
AB-007143	0.0235766	0.0531	4.69525	360.336	1289.87	20883.3																								22	IGHV3-15	IGKV2-28	46	Fx017	P	P4D	IGHV3-15/13/IGKV2-28/10/0
AB-007144	0.0576524	1.01529	40.9215	NA	NA	NA																								27	IGHV3-15	IGKV2-28	46	Fx017	P	P4D	IGHV3-15/13/IGKV2-28/10/0
AB-007145	0.037437	0.97306	12.8397	485.775	21488.8	NA																								24	IGHV3-15	IGKV2-28	46	Fx017	P	P4D	IGHV3-15/13/IGKV2-28/10/0
AB-007146	0.174135	0.692558	14.4309	2287.84	12928.2	34513																								19	IGHV3-15	IGKV2-28	46	Fx017	P	P4D	IGHV3-15/13/IGKV2-28/10/0
AB-007147	0.0473717	0.466313	4.08861	1614.58	5495.23	24719.1																								51	IGHV3-15	IGKV2-28	46	Fx017	P	P4D	IGHV3-15/13/IGKV2-28/10/0
AB-007148	0.0499173	2.47494	134.791	NA	NA	NA																								19	IGHV3-15	IGKV2-28	46	Fx017	P	P4D	IGHV3-15/13/IGKV2-28/10/0
AB-007149	0.0439421	0.0902	29.6064	17910.9	18366.2	NA																								34	IGHV3-15	IGKV2-28	46	Fx017	P	P4D	IGHV3-15/13/IGKV2-28/10/0
AB-007151	0.10711	0.473119	8.79439	77.2878	2301.02	NA																								33	IGHV3-15	IGKV2-28	46	Fx017	P	P3D	IGHV3-15/13/IGKV2-28/10/0
AB-007152	0.0402657	0.056	11.1746	556.093	15456.5	NA																								32	IGHV3-15	IGKV2-28	46	Fx017	P	P3D	IGHV3-15/13/IGKV2-28/10/0
AB-007153	0.128872	0.0406	1433.48	6.92906	590.849	NA																								37	IGHV3-33	IGKV1-5	5	Fx017	P	P4D	IGHV3-33/18/IGKV1-5/9/1
AB-007155	0.0631963	0.0428	1.34596	0.0264286	0.296314	5.90203																								48	IGHV3-33	IGKV1-5	5	Fx017	P	P4D	IGHV3-33/18/IGKV1-5/9/1
AB-007156	0.215644	1.24068	26.0245	0.713767	10.0255	24502.8																								33	IGHV3-33	IGKV1-5	5	Fx017	P	P4D	IGHV3-33/18/IGKV1-5/9/1
AB-007157	0.0224276	0.0276	218.046	0.836164	1.32455	NA																								32	IGHV3-33	IGKV1-5	5	Fx017	P	P4D	IGHV3-33/18/IGKV1-5/9/1
AB-000222	0.0859308	0.0308	0.649471	0.120426	0.263913	388.031																								33	IGHV3-33	IGLV1-40	53	Fx017	P	P3D	IGHV3-33/18/IGLV1-40/12/0
AB-007162	0.0193416	0.0571	1.35121	0.0678768	0.527497	2514.57																								26	IGHV3-33	IGLV1-40	53	Fx017	P	P4D	IGHV3-33/18/IGLV1-40/12/0
AB-007164	0.0712266	0.416284	0.948344	0.495131	0.587102	770.977																								44	IGHV3-33	IGLV1-40	53	Fx017	P	P4D	IGHV3-33/18/IGLV1-40/12/0
AB-007166	0.287983	0.0449	0.958947	0.0416984	0.796313	897.957																								43	IGHV3-33	IGLV1-40	53	Fx017	P	P3D	IGHV3-33/18/IGLV1-40/12/0
AB-007167	0.0471364	0.407998	0.580085	0.277913	0.526355	458.264																								55	IGHV3-33	IGLV1-40	53	Fx017	P	P3D	IGHV3-33/18/IGLV1-40/12/0
AB-007171	0.0201276	0.0241	0.979134	0.301474	NA	16577.7																								19	IGHV3-33	IGLV1-40	63	Fx017	P	P3D	IGHV3-33/15/IGLV1-40/13/0
AB-007172	0.156363	0.0528	7.25416	2.64002	1877.94	NA																								38	IGHV3-33	IGLV1-40	63	Fx017	P	P3D	IGHV3-33/15/IGLV1-40/13/0
AB-007174	0.0184383	0.0409	0.334985	0.88453	12.1522	NA																								37	IGHV3-33	IGLV1-40	63	Fx017	P	P3D	IGHV3-33/15/IGLV1-40/13/0
AB-000337	0.250844	0.188	13.6869	8.71406	889.435	18334.9																								28	IGHV3-33	IGKV3-15	63	Fx017	P	P3D	IGHV3-33/18/IGKV3-15/9/0
AB-007177	0.0699537	0.0657	25.9243	4.13808	59.3897	6436.59																								31	IGHV3-33	IGKV3-15	63	Fx017	P	P3D	IGHV3-33/18/IGKV3-15/9/0
AB-007179	0.373254	0.0384	665.987	1.63253	212.717	NA																								26	IGHV3-33	IGKV1-5	63	Fx017	P	P3D	IGHV3-33/19/IGKV1-5/9/0
AB-007180	0.231622	0.277	357.03	7.26075	6655.66	NA																								14	IGHV3-33	IGKV1-5	63	Fx017	P	P3D	IGHV3-33/19/IGKV1-5/9/0
AB-007181	0.172508	0.933137	987.653	15.0717	11544.3	NA																								20	IGHV3-33	IGKV1-5	63	Fx017	P	P3D	IGHV3-33/19/IGKV1-5/9/0
AB-007183	0.272453	0.164	2000.42	39.3816	NA	NA																								24	IGHV3-33	IGLV1-40	63	Fx017	P	P3D	IGHV3-33/20/IGLV1-40/13/0
																																					NA, not applicable; LB, liver burden; P3D, post-third dose RTS,S; HR, hazard ratio; CI, confidence interval
																																					apercent inhibition normalized to percent inhibition of AB-000317 tested in parallel; btwo-sided, non-parametric log-rank test; cMantel-Haenszel test
