# Supplementary material for: An antibody drug engineered for prevention of malaria in global populations
Source: Research Square preprint supplement (doi:10.21203/rs.3.rs-2678519/v1), 2023-04-04
Supplement: Supplementary file 4 [file 86ba0df49a97fd0c0d40774a.xlsx]

## Sheet: Supplementary Table 5
Supplementary Table 5 | MAbs in anti-CSP screening library from protected vaccinees, and of each selection criterion, reflect proportion of protected vaccinees in RTS,S clinical trial
				Selection criteria of clone within lineage
	Vaccinees	mAbs screened		Dominant clonea	Convergent clonea	Leafiest decent clonea	Most mutated clonea
mAb tested in anti-CSP screen (n=369), from all vaccinees (n=45)	45	369		262	289	196	356
P3D CHMI protected vaccinees	36	268		189	212	136	255
P3D CHMI not protected vaccinees	9	101		73	77	60	101
Proportion of/from P3D CHMI protected vaccinees	0.8	0.726287		0.721374	0.733564	0.693878	0.716292
Proportion of/from P3D CHMI not protected vaccinees	0.2	0.273713		0.278626	0.266436	0.306122	0.283708
Fisher's exact test P value
P value [ratio of number of P and NP vaccinees compared to ratio of number of mAbs in screening library from P and NP vaccinees]	NA	0.3719		NA	NA	NA	NA
P values [ratio of number of P and NP vaccinees compared to ratio of number of mAbs of each selection criteria from P and NP vaccinees]	NA	NA		0.3617	0.4634	0.2007	0.2888
P values [ratio of number of mAbs in screening library from P and NP vaccinees compared to ratio of number of mAbs of each selection criteria from P and NP vaccinees]	NA	NA		0.928	0.8599	0.4343	0.8038
							P3D, post-third-dose RTS,S; P, protected; NP, not protected; NA, not applicable
							aproperties of clone selection from within the clone's lineage, several mAbs meet more than one criterion (Supplemental Table 4)
