# Supplementary material for: An antibody drug engineered for prevention of malaria in global populations
Source: Research Square preprint supplement (doi:10.21203/rs.3.rs-2678519/v1), 2023-04-04
Supplement: Supplementary file 5 [file 97bd64aa11da8ac434451fc7.xlsx]

## Sheet: Supplementary Table 7
Supplementary Table 7 | Residue positions of AB-007088
MS-1800_LC (AB-007088)					MS-1800_HC (AB-007088)
Residue	Linear #	Mat. Linear #	ASN #		Residue	Linear #	Mat. Linear #	ASN #
M	1	-22	KLdr#1:-22		M	1	-22	KLdr#1:-22
D	2	-21	KLdr#1:-21		D	2	-21	KLdr#1:-21
M	3	-20	KLdr#1:-20		M	3	-20	KLdr#1:-20
R	4	-19	KLdr#1:-19		R	4	-19	KLdr#1:-19
V	5	-18	KLdr#1:-18		V	5	-18	KLdr#1:-18
P	6	-17	KLdr#1:-17		P	6	-17	KLdr#1:-17
A	7	-16	KLdr#1:-16		A	7	-16	KLdr#1:-16
Q	8	-15	KLdr#1:-15		Q	8	-15	KLdr#1:-15
L	9	-14	KLdr#1:-14		L	9	-14	KLdr#1:-14
L	10	-13	KLdr#1:-13		L	10	-13	KLdr#1:-13
G	11	-12	KLdr#1:-12		G	11	-12	KLdr#1:-12
L	12	-11	KLdr#1:-11		L	12	-11	KLdr#1:-11
L	13	-10	KLdr#1:-10		L	13	-10	KLdr#1:-10
L	14	-9	KLdr#1:-9		L	14	-9	KLdr#1:-9
L	15	-8	KLdr#1:-8		L	15	-8	KLdr#1:-8
W	16	-7	KLdr#1:-7		W	16	-7	KLdr#1:-7
L	17	-6	KLdr#1:-6		L	17	-6	KLdr#1:-6
R	18	-5	KLdr#1:-5		R	18	-5	KLdr#1:-5
G	19	-4	KLdr#1:-4		G	19	-4	KLdr#1:-4
A	20	-3	KLdr#1:-3		A	20	-3	KLdr#1:-3
R	21	-2	KLdr#1:-2		R	21	-2	KLdr#1:-2
C	22	-1	KLdr#1:-1		C	22	-1	KLdr#1:-1
G	23	1	KV:1		Q	23	1	HV:1
V	24	2	KV:2		V	24	2	HV:2
Q	25	3	KV:3		Q	25	3	HV:3
M	26	4	KV:4		L	26	4	HV:4
T	27	5	KV:5		V	27	5	HV:5
Q	28	6	KV:6		E	28	6	HV:6
S	29	7	KV:7		S	29	7	HV:7
P	30	8	KV:8		-	29.1	7.1	HV:8
S	31	9	KV:9		G	30	8	HV:9
T	32	10	KV:10		G	31	9	HV:10
L	33	11	KV:11		G	32	10	HV:11
S	34	12	KV:12		V	33	11	HV:12
A	35	13	KV:13		V	34	12	HV:13
S	36	14	KV:14		Q	35	13	HV:14
V	37	15	KV:15		P	36	14	HV:15
G	38	16	KV:16		G	37	15	HV:16
D	39	17	KV:17		R	38	16	HV:17
R	40	18	KV:18		S	39	17	HV:18
V	41	19	KV:19		L	40	18	HV:19
T	42	20	KV:20		R	41	19	HV:20
L	43	21	KV:21		L	42	20	HV:21
T	44	22	KV:22		S	43	21	HV:22
C	45	23	KV:23		C	44	22	HV:23
R	46	24	KV:24		A	45	23	HV:24
A	47	25	KV:25		A	46	24	HV:25
S	48	26	KV:26		S	47	25	HV:26
-	48.1	26.1	KV:27		G	48	26	HV:27
-	48.2	26.2	KV:28		-	48.1	26.1	HV:28
Q	49	27	KV:29		F	49	27	HV:29
S	50	28	KV:30		A	50	28	HV:30
I	51	29	KV:31		F	51	29	HV:31
S	52	30	KV:32		N	52	30	HV:32
S	53	31	KV:33		T	53	31	HV:33
-	53.1	31.1	KV:34		-	53.1	31.1	HV:34
-	53.2	31.2	KV:35		-	53.2	31.2	HV:35
-	53.3	31.3	KV:36		-	53.3	31.3	HV:36
-	53.4	31.4	KV:37		-	53.4	31.4	HV:37
-	53.5	31.5	KV:38		-	53.5	31.5	HV:38
-	53.6	31.6	KV:39		Y	54	32	HV:39
W	54	32	KV:40		G	55	33	HV:40
L	55	33	KV:41		M	56	34	HV:41
A	56	34	KV:42		H	57	35	HV:42
W	57	35	KV:43		W	58	36	HV:43
Y	58	36	KV:44		V	59	37	HV:44
Q	59	37	KV:45		R	60	38	HV:45
Q	60	38	KV:46		Q	61	39	HV:46
K	61	39	KV:47		T	62	40	HV:47
P	62	40	KV:48		P	63	41	HV:48
G	63	41	KV:49		G	64	42	HV:49
K	64	42	KV:50		K	65	43	HV:50
A	65	43	KV:51		G	66	44	HV:51
P	66	44	KV:52		L	67	45	HV:52
K	67	45	KV:53		E	68	46	HV:53
L	68	46	KV:54		W	69	47	HV:54
L	69	47	KV:55		V	70	48	HV:55
I	70	48	KV:56		A	71	49	HV:56
Y	71	49	KV:57		I	72	50	HV:57
D	72	50	KV:58		I	73	51	HV:58
-	72.1	50.1	KV:59		W	74	52	HV:59
-	72.2	50.2	KV:60		Y	75	53	HV:60
-	72.3	50.3	KV:61		-	75.1	53.1	HV:61
-	72.4	50.4	KV:62		-	75.2	53.2	HV:62
-	72.5	50.5	KV:63		-	75.3	53.3	HV:63
-	72.6	50.6	KV:64		D	76	54	HV:64
-	72.7	50.7	KV:65		G	77	55	HV:65
-	72.8	50.8	KV:66		S	78	56	HV:66
A	73	51	KV:67		Q	79	57	HV:67
S	74	52	KV:68		K	80	58	HV:68
S	75	53	KV:69		Y	81	59	HV:69
L	76	54	KV:70		Y	82	60	HV:70
E	77	55	KV:71		A	83	61	HV:71
S	78	56	KV:72		D	84	62	HV:72
G	79	57	KV:73		S	85	63	HV:73
V	80	58	KV:74		V	86	64	HV:74
P	81	59	KV:75		Q	87	65	HV:75
S	82	60	KV:76		G	88	66	HV:76
R	83	61	KV:77		R	89	67	HV:77
F	84	62	KV:78		F	90	68	HV:78
S	85	63	KV:79		I	91	69	HV:79
G	86	64	KV:80		I	92	70	HV:80
S	87	65	KV:81		S	93	71	HV:81
G	88	66	KV:82		R	94	72	HV:82
S	89	67	KV:83		D	95	73	HV:83
G	90	68	KV:84		N	96	74	HV:84
-	90.1	68.1	KV:85		H	97	75	HV:85
-	90.2	68.2	KV:86		K	98	76	HV:86
T	91	69	KV:87		N	99	77	HV:87
E	92	70	KV:88		T	100	78	HV:88
F	93	71	KV:89		L	101	79	HV:89
T	94	72	KV:90		S	102	80	HV:90
L	95	73	KV:91		L	103	81	HV:91
T	96	74	KV:92		Q	104	82	HV:92
I	97	75	KV:93		M	105	83	HV:93
S	98	76	KV:94		N	106	84	HV:94
S	99	77	KV:95		G	107	85	HV:95
L	100	78	KV:96		L	108	86	HV:96
Q	101	79	KV:97		R	109	87	HV:97
P	102	80	KV:98		A	110	88	HV:98
D	103	81	KV:99		E	111	89	HV:99
D	104	82	KV:100		D	112	90	HV:100
F	105	83	KV:101		T	113	91	HV:101
A	106	84	KV:102		A	114	92	HV:102
T	107	85	KV:103		V	115	93	HV:103
Y	108	86	KV:104		Y	116	94	HV:104
Y	109	87	KV:105		F	117	95	HV:105
C	110	88	KV:106		C	118	96	HV:106
Q	111	89	KV:107		V	119	97	HV:107
Q	112	90	KV:108		R	120	98	HV:108
Y	113	91	KV:109		V	121	99	HV:109
N	114	92	KV:110		R	122	100	HV:110
S	115	93	KV:111		F	123	101	HV:111
-	115.1	93.1	KV:112		S	124	102	HV:112
-	115.2	93.2	KV:113		V	125	103	HV:113
-	115.3	93.3	KV:114		G	126	104	HV:114
-	115.4	93.4	KV:115		-	126.1	104.1	HV:115
-	115.5	93.5	KV:116		-	126.2	104.2	HV:116
-	115.6	93.6	KV:117		-	126.3	104.3	HV:117
-	115.7	93.7	KV:118		-	126.4	104.4	HV:118
-	115.8	93.8	KV:119		-	126.5	104.5	HV:119
-	115.9	93.9	KV:120		-	126.6	104.6	HV:120
-	115.10	93.10	KV:121		-	126.7	104.7	HV:121
-	115.11	93.11	KV:122		-	126.8	104.8	HV:122
-	115.12	93.12	KV:123		-	126.9	104.9	HV:123
-	115.13	93.13	KV:124		-	126.10	104.10	HV:124
-	115.14	93.14	KV:125		-	126.11	104.11	HV:125
-	115.15	93.15	KV:126		-	126.12	104.12	HV:126
-	115.16	93.16	KV:127		-	126.13	104.13	HV:127
-	115.17	93.17	KV:128		-	126.14	104.14	HV:128
-	115.18	93.18	KV:129		-	126.15	104.15	HV:129
-	115.19	93.19	KV:130		-	126.16	104.16	HV:130
-	115.20	93.20	KV:131		P	127	105	HV:131
-	115.21	93.21	KV:132		H	128	106	HV:132
-	115.22	93.22	KV:133		G	129	107	HV:133
Y	116	94	KV:134		S	130	108	HV:134
S	117	95	KV:135		A	131	109	HV:135
F	118	96	KV:136		F	132	110	HV:136
W	119	97	KV:137		D	133	111	HV:137
T	120	98	KV:138		L	134	112	HV:138
F	121	99	KV:139		W	135	113	HV:139
G	122	100	KV:140		G	136	114	HV:140
Q	123	101	KV:141		Q	137	115	HV:141
G	124	102	KV:142		G	138	116	HV:142
T	125	103	KV:143		T	139	117	HV:143
K	126	104	KV:144		M	140	118	HV:144
V	127	105	KV:145		V	141	119	HV:145
E	128	106	KV:146		I	142	120	HV:146
I	129	107	KV:147		V	143	121	HV:147
K	130	108	KV:148		S	144	122	HV:148
R	131	109	KV:149		S	145	123	HV:149
-	131.1	109.1	KCnst-Ig:1		-	145.1	123.1	HCnst-Ig:1
T	132	110	KCnst-Ig:2		-	145.2	123.2	HCnst-Ig:2
V	133	111	KCnst-Ig:3		A	146	124	HCnst-Ig:3
A	134	112	KCnst-Ig:4		S	147	125	HCnst-Ig:4
A	135	113	KCnst-Ig:5		T	148	126	HCnst-Ig:5
P	136	114	KCnst-Ig:6		K	149	127	HCnst-Ig:6
S	137	115	KCnst-Ig:7		G	150	128	HCnst-Ig:7
V	138	116	KCnst-Ig:8		P	151	129	HCnst-Ig:8
F	139	117	KCnst-Ig:9		S	152	130	HCnst-Ig:9
I	140	118	KCnst-Ig:10		V	153	131	HCnst-Ig:10
F	141	119	KCnst-Ig:11		F	154	132	HCnst-Ig:11
P	142	120	KCnst-Ig:12		P	155	133	HCnst-Ig:12
P	143	121	KCnst-Ig:13		L	156	134	HCnst-Ig:13
S	144	122	KCnst-Ig:14		A	157	135	HCnst-Ig:14
D	145	123	KCnst-Ig:15		P	158	136	HCnst-Ig:15
E	146	124	KCnst-Ig:16		-	158.1	136.1	HCnst-Ig:16
-	146.1	124.1	KCnst-Ig:17		S	159	137	HCnst-Ig:17
-	146.2	124.2	KCnst-Ig:18		-	159.1	137.1	HCnst-Ig:18
Q	147	125	KCnst-Ig:19		S	160	138	HCnst-Ig:19
L	148	126	KCnst-Ig:20		K	161	139	HCnst-Ig:20
-	148.1	126.1	KCnst-Ig:21		S	162	140	HCnst-Ig:21
-	148.2	126.2	KCnst-Ig:22		T	163	141	HCnst-Ig:22
K	149	127	KCnst-Ig:23		S	164	142	HCnst-Ig:23
S	150	128	KCnst-Ig:24		G	165	143	HCnst-Ig:24
G	151	129	KCnst-Ig:25		G	166	144	HCnst-Ig:25
T	152	130	KCnst-Ig:26		T	167	145	HCnst-Ig:26
A	153	131	KCnst-Ig:27		A	168	146	HCnst-Ig:27
S	154	132	KCnst-Ig:28		A	169	147	HCnst-Ig:28
V	155	133	KCnst-Ig:29		L	170	148	HCnst-Ig:29
V	156	134	KCnst-Ig:30		G	171	149	HCnst-Ig:30
C	157	135	KCnst-Ig:31		C	172	150	HCnst-Ig:31
L	158	136	KCnst-Ig:32		L	173	151	HCnst-Ig:32
L	159	137	KCnst-Ig:33		V	174	152	HCnst-Ig:33
N	160	138	KCnst-Ig:34		K	175	153	HCnst-Ig:34
N	161	139	KCnst-Ig:35		D	176	154	HCnst-Ig:35
F	162	140	KCnst-Ig:36		Y	177	155	HCnst-Ig:36
Y	163	141	KCnst-Ig:37		F	178	156	HCnst-Ig:37
P	164	142	KCnst-Ig:38		P	179	157	HCnst-Ig:38
-	164.1	142.1	KCnst-Ig:39		-	179.1	157.1	HCnst-Ig:39
-	164.2	142.2	KCnst-Ig:40		-	179.2	157.2	HCnst-Ig:40
R	165	143	KCnst-Ig:41		E	180	158	HCnst-Ig:41
E	166	144	KCnst-Ig:42		P	181	159	HCnst-Ig:42
A	167	145	KCnst-Ig:43		V	182	160	HCnst-Ig:43
K	168	146	KCnst-Ig:44		T	183	161	HCnst-Ig:44
V	169	147	KCnst-Ig:45		V	184	162	HCnst-Ig:45
Q	170	148	KCnst-Ig:46		S	185	163	HCnst-Ig:46
W	171	149	KCnst-Ig:47		W	186	164	HCnst-Ig:47
-	171.1	149.1	KCnst-Ig:48		-	186.1	164.1	HCnst-Ig:48
K	172	150	KCnst-Ig:49		N	187	165	HCnst-Ig:49
V	173	151	KCnst-Ig:50		S	188	166	HCnst-Ig:50
D	174	152	KCnst-Ig:51		G	189	167	HCnst-Ig:51
N	175	153	KCnst-Ig:52		A	190	168	HCnst-Ig:52
A	176	154	KCnst-Ig:53		L	191	169	HCnst-Ig:53
L	177	155	KCnst-Ig:54		T	192	170	HCnst-Ig:54
Q	178	156	KCnst-Ig:55		S	193	171	HCnst-Ig:55
S	179	157	KCnst-Ig:56		G	194	172	HCnst-Ig:56
G	180	158	KCnst-Ig:57		V	195	173	HCnst-Ig:57
N	181	159	KCnst-Ig:58		H	196	174	HCnst-Ig:58
S	182	160	KCnst-Ig:59		T	197	175	HCnst-Ig:59
Q	183	161	KCnst-Ig:60		-	197.1	175.1	HCnst-Ig:60
E	184	162	KCnst-Ig:61		-	197.2	175.2	HCnst-Ig:61
S	185	163	KCnst-Ig:62		-	197.3	175.3	HCnst-Ig:62
V	186	164	KCnst-Ig:63		F	198	176	HCnst-Ig:63
T	187	165	KCnst-Ig:64		P	199	177	HCnst-Ig:64
E	188	166	KCnst-Ig:65		A	200	178	HCnst-Ig:65
Q	189	167	KCnst-Ig:66		V	201	179	HCnst-Ig:66
D	190	168	KCnst-Ig:67		L	202	180	HCnst-Ig:67
-	190.1	168.1	KCnst-Ig:68		Q	203	181	HCnst-Ig:68
-	190.2	168.2	KCnst-Ig:69		-	203.1	181.1	HCnst-Ig:69
-	190.3	168.3	KCnst-Ig:70		-	203.2	181.2	HCnst-Ig:70
-	190.4	168.4	KCnst-Ig:71		-	203.3	181.3	HCnst-Ig:71
S	191	169	KCnst-Ig:72		-	203.4	181.4	HCnst-Ig:72
K	192	170	KCnst-Ig:73		S	204	182	HCnst-Ig:73
D	193	171	KCnst-Ig:74		S	205	183	HCnst-Ig:74
S	194	172	KCnst-Ig:75		G	206	184	HCnst-Ig:75
T	195	173	KCnst-Ig:76		L	207	185	HCnst-Ig:76
Y	196	174	KCnst-Ig:77		Y	208	186	HCnst-Ig:77
S	197	175	KCnst-Ig:78		S	209	187	HCnst-Ig:78
L	198	176	KCnst-Ig:79		L	210	188	HCnst-Ig:79
S	199	177	KCnst-Ig:80		S	211	189	HCnst-Ig:80
S	200	178	KCnst-Ig:81		S	212	190	HCnst-Ig:81
T	201	179	KCnst-Ig:82		V	213	191	HCnst-Ig:82
L	202	180	KCnst-Ig:83		V	214	192	HCnst-Ig:83
T	203	181	KCnst-Ig:84		T	215	193	HCnst-Ig:84
L	204	182	KCnst-Ig:85		V	216	194	HCnst-Ig:85
S	205	183	KCnst-Ig:86		P	217	195	HCnst-Ig:86
K	206	184	KCnst-Ig:87		S	218	196	HCnst-Ig:87
A	207	185	KCnst-Ig:88		S	219	197	HCnst-Ig:88
D	208	186	KCnst-Ig:89		S	220	198	HCnst-Ig:89
Y	209	187	KCnst-Ig:90		L	221	199	HCnst-Ig:90
-	209.1	187.1	KCnst-Ig:91		-	221.1	199.1	HCnst-Ig:91
E	210	188	KCnst-Ig:92		G	222	200	HCnst-Ig:92
K	211	189	KCnst-Ig:93		T	223	201	HCnst-Ig:93
H	212	190	KCnst-Ig:94		Q	224	202	HCnst-Ig:94
K	213	191	KCnst-Ig:95		T	225	203	HCnst-Ig:95
V	214	192	KCnst-Ig:96		-	225.1	203.1	HCnst-Ig:96
-	214.1	192.1	KCnst-Ig:97		-	225.2	203.2	HCnst-Ig:97
-	214.2	192.2	KCnst-Ig:98		-	225.3	203.3	HCnst-Ig:98
Y	215	193	KCnst-Ig:99		Y	226	204	HCnst-Ig:99
A	216	194	KCnst-Ig:100		I	227	205	HCnst-Ig:100
C	217	195	KCnst-Ig:101		C	228	206	HCnst-Ig:101
E	218	196	KCnst-Ig:102		N	229	207	HCnst-Ig:102
V	219	197	KCnst-Ig:103		V	230	208	HCnst-Ig:103
T	220	198	KCnst-Ig:104		N	231	209	HCnst-Ig:104
H	221	199	KCnst-Ig:105		H	232	210	HCnst-Ig:105
Q	222	200	KCnst-Ig:106		K	233	211	HCnst-Ig:106
G	223	201	KCnst-Ig:107		P	234	212	HCnst-Ig:107
L	224	202	KCnst-Ig:108		S	235	213	HCnst-Ig:108
S	225	203	KCnst-Ig:109		N	236	214	HCnst-Ig:109
-	225.1	203.1	KCnst-Ig:110		-	236.1	214.1	HCnst-Ig:110
S	226	204	KCnst-Ig:111		-	236.2	214.2	HCnst-Ig:111
P	227	205	KCnst-Ig:112		T	237	215	HCnst-Ig:112
V	228	206	KCnst-Ig:113		K	238	216	HCnst-Ig:113
T	229	207	KCnst-Ig:114		V	239	217	HCnst-Ig:114
K	230	208	KCnst-Ig:115		D	240	218	HCnst-Ig:115
S	231	209	KCnst-Ig:116		K	241	219	HCnst-Ig:116
F	232	210	KCnst-Ig:117		-	241.1	219.1	HCnst-Ig:117
N	233	211	KCnst-Ig:118		K	242	220	HCnst-Ig:118
R	234	212	KCnst-Ig:119		V	243	221	HCnst-Ig:119
G	235	213	KCnst-Ig:120		-	243.1	221.1	HCnst-Ig:120
E	236	214	KCnst-Ig:121		-	243.2	221.2	HCnst-Ig:121
C	237	215	KCnst-Ig:122		-	243.3	221.3	HCnst-Ig:122
-	237.1	215.1	KCnst-Ig:123		-	243.4	221.4	HCnst-Ig:123
					-	243.5	221.1	Hinge:1
					-	243.6	221.2	Hinge:2
					-	243.7	221.3	Hinge:3
					-	243.8	221.4	Hinge:4
					-	243.9	221.5	Hinge:5
					-	243.10	221.6	Hinge:6
					-	243.11	221.7	Hinge:7
					-	243.12	221.8	Hinge:8
					-	243.13	221.9	Hinge:9
					-	243.14	221.10	Hinge:10
					-	243.15	221.11	Hinge:11
					-	243.16	221.12	Hinge:12
					-	243.17	221.13	Hinge:13
					-	243.18	221.14	Hinge:14
					-	243.19	221.15	Hinge:15
					-	243.20	221.16	Hinge:16
					-	243.21	221.17	Hinge:17
					-	243.22	221.18	Hinge:18
					-	243.23	221.19	Hinge:19
					-	243.24	221.20	Hinge:20
					-	243.25	221.21	Hinge:21
					-	243.26	221.22	Hinge:22
					-	243.27	221.23	Hinge:23
					-	243.28	221.24	Hinge:24
					-	243.29	221.25	Hinge:25
					-	243.30	221.26	Hinge:26
					-	243.31	221.27	Hinge:27
					-	243.32	221.28	Hinge:28
					-	243.33	221.29	Hinge:29
					-	243.34	221.30	Hinge:30
					-	243.35	221.31	Hinge:31
					-	243.36	221.32	Hinge:32
					-	243.37	221.33	Hinge:33
					-	243.38	221.34	Hinge:34
					-	243.39	221.35	Hinge:35
					-	243.40	221.36	Hinge:36
					-	243.41	221.37	Hinge:37
					-	243.42	221.38	Hinge:38
					-	243.43	221.39	Hinge:39
					-	243.44	221.40	Hinge:40
					-	243.45	221.41	Hinge:41
					-	243.46	221.42	Hinge:42
					-	243.47	221.43	Hinge:43
					-	243.48	221.44	Hinge:44
					-	243.49	221.45	Hinge:45
					-	243.50	221.46	Hinge:46
					-	243.51	221.47	Hinge:47
					-	243.52	221.48	Hinge:48
					-	243.53	221.49	Hinge:49
					-	243.54	221.50	Hinge:50
					-	243.55	221.51	Hinge:51
					-	243.56	221.52	Hinge:52
					-	243.57	221.53	Hinge:53
					-	243.58	221.54	Hinge:54
					-	243.59	221.55	Hinge:55
					-	243.60	221.56	Hinge:56
					-	243.61	221.57	Hinge:57
					-	243.62	221.58	Hinge:58
					-	243.63	221.59	Hinge:59
					-	243.64	221.60	Hinge:60
					-	243.65	221.61	Hinge:61
					-	243.66	221.62	Hinge:62
					-	243.67	221.63	Hinge:63
					-	243.68	221.64	Hinge:64
					-	243.69	221.65	Hinge:65
					-	243.70	221.66	Hinge:66
					-	243.71	221.67	Hinge:67
					-	243.72	221.68	Hinge:68
					-	243.73	221.69	Hinge:69
					-	243.74	221.70	Hinge:70
					-	243.75	221.71	Hinge:71
					-	243.76	221.72	Hinge:72
					-	243.77	221.73	Hinge:73
					-	243.78	221.74	Hinge:74
					-	243.79	221.75	Hinge:75
					-	243.80	221.76	Hinge:76
					-	243.81	221.77	Hinge:77
					-	243.82	221.78	Hinge:78
					-	243.83	221.79	Hinge:79
					-	243.84	221.80	Hinge:80
					-	243.85	221.81	Hinge:81
					-	243.86	221.82	Hinge:82
					-	243.87	221.83	Hinge:83
					-	243.88	221.84	Hinge:84
					-	243.89	221.85	Hinge:85
					-	243.90	221.86	Hinge:86
					-	243.91	221.87	Hinge:87
					-	243.92	221.88	Hinge:88
					-	243.93	221.89	Hinge:89
					-	243.94	221.90	Hinge:90
					-	243.95	221.91	Hinge:91
					-	243.96	221.92	Hinge:92
					-	243.97	221.93	Hinge:93
					-	243.98	221.94	Hinge:94
					-	243.99	221.95	Hinge:95
					E	244	222	Hinge:96
					P	245	223	Hinge:97
					K	246	224	Hinge:98
					S	247	225	Hinge:99
					-	247.1	225.1	Hinge:100
					-	247.2	225.2	Hinge:101
					-	247.3	225.3	Hinge:102
					-	247.4	225.4	Hinge:103
					-	247.5	225.5	Hinge:104
					-	247.6	225.6	Hinge:105
					-	247.7	225.7	Hinge:106
					C	248	226	Hinge:107
					D	249	227	Hinge:108
					K	250	228	Hinge:109
					T	251	229	Hinge:110
					H	252	230	Hinge:111
					T	253	231	Hinge:112
					C	254	232	Hinge:113
					P	255	233	Hinge:114
					P	256	234	Hinge:115
					C	257	235	Hinge:116
					P	258	236	Hinge:117
					A	259	237	Hinge:118
					P	260	238	Hinge:119
					E	261	239	Hinge:120
					L	262	240	Hinge:121
					L	263	241	Hinge:122
					G	264	242	Hinge:123
					-	264.1	242.1	Fc-N:1
					-	264.2	242.2	Fc-N:2
					-	264.3	242.3	Fc-N:3
					-	264.4	242.4	Fc-N:4
					G	265	243	Fc-N:5
					P	266	244	Fc-N:6
					S	267	245	Fc-N:7
					V	268	246	Fc-N:8
					F	269	247	Fc-N:9
					L	270	248	Fc-N:10
					F	271	249	Fc-N:11
					P	272	250	Fc-N:12
					P	273	251	Fc-N:13
					-	273.1	251.1	Fc-N:14
					K	274	252	Fc-N:15
					P	275	253	Fc-N:16
					K	276	254	Fc-N:17
					-	276.1	254.1	Fc-N:18
					D	277	255	Fc-N:19
					T	278	256	Fc-N:20
					L	279	257	Fc-N:21
					M	280	258	Fc-N:22
					I	281	259	Fc-N:23
					S	282	260	Fc-N:24
					R	283	261	Fc-N:25
					T	284	262	Fc-N:26
					P	285	263	Fc-N:27
					E	286	264	Fc-N:28
					V	287	265	Fc-N:29
					T	288	266	Fc-N:30
					C	289	267	Fc-N:31
					V	290	268	Fc-N:32
					V	291	269	Fc-N:33
					V	292	270	Fc-N:34
					D	293	271	Fc-N:35
					V	294	272	Fc-N:36
					S	295	273	Fc-N:37
					H	296	274	Fc-N:38
					E	297	275	Fc-N:39
					D	298	276	Fc-N:40
					P	299	277	Fc-N:41
					E	300	278	Fc-N:42
					V	301	279	Fc-N:43
					K	302	280	Fc-N:44
					F	303	281	Fc-N:45
					N	304	282	Fc-N:46
					W	305	283	Fc-N:47
					-	305.1	283.1	Fc-N:48
					Y	306	284	Fc-N:49
					V	307	285	Fc-N:50
					D	308	286	Fc-N:51
					G	309	287	Fc-N:52
					V	310	288	Fc-N:53
					E	311	289	Fc-N:54
					-	311.1	289.1	Fc-N:55
					-	311.2	289.2	Fc-N:56
					V	312	290	Fc-N:57
					H	313	291	Fc-N:58
					N	314	292	Fc-N:59
					A	315	293	Fc-N:60
					K	316	294	Fc-N:61
					T	317	295	Fc-N:62
					K	318	296	Fc-N:63
					P	319	297	Fc-N:64
					R	320	298	Fc-N:65
					E	321	299	Fc-N:66
					E	322	300	Fc-N:67
					Q	323	301	Fc-N:68
					-	323.1	301.1	Fc-N:69
					-	323.2	301.2	Fc-N:70
					-	323.3	301.3	Fc-N:71
					-	323.4	301.4	Fc-N:72
					Y	324	302	Fc-N:73
					N	325	303	Fc-N:74
					S	326	304	Fc-N:75
					T	327	305	Fc-N:76
					Y	328	306	Fc-N:77
					R	329	307	Fc-N:78
					V	330	308	Fc-N:79
					V	331	309	Fc-N:80
					S	332	310	Fc-N:81
					V	333	311	Fc-N:82
					L	334	312	Fc-N:83
					T	335	313	Fc-N:84
					V	336	314	Fc-N:85
					L	337	315	Fc-N:86
					H	338	316	Fc-N:87
					Q	339	317	Fc-N:88
					D	340	318	Fc-N:89
					W	341	319	Fc-N:90
					-	341.1	319.1	Fc-N:91
					L	342	320	Fc-N:92
					N	343	321	Fc-N:93
					G	344	322	Fc-N:94
					K	345	323	Fc-N:95
					E	346	324	Fc-N:96
					-	346.1	324.1	Fc-N:97
					-	346.2	324.2	Fc-N:98
					Y	347	325	Fc-N:99
					K	348	326	Fc-N:100
					C	349	327	Fc-N:101
					K	350	328	Fc-N:102
					V	351	329	Fc-N:103
					S	352	330	Fc-N:104
					N	353	331	Fc-N:105
					K	354	332	Fc-N:106
					A	355	333	Fc-N:107
					L	356	334	Fc-N:108
					P	357	335	Fc-N:109
					-	357.1	335.1	Fc-N:110
					-	357.2	335.2	Fc-N:111
					A	358	336	Fc-N:112
					P	359	337	Fc-N:113
					I	360	338	Fc-N:114
					E	361	339	Fc-N:115
					K	362	340	Fc-N:116
					T	363	341	Fc-N:117
					I	364	342	Fc-N:118
					S	365	343	Fc-N:119
					K	366	344	Fc-N:120
					A	367	345	Fc-N:121
					K	368	346	Fc-N:122
					G	369	347	Fc-N:123
					-	369.1	347.1	Fc-C:1
					Q	370	348	Fc-C:2
					P	371	349	Fc-C:3
					R	372	350	Fc-C:4
					E	373	351	Fc-C:5
					P	374	352	Fc-C:6
					Q	375	353	Fc-C:7
					V	376	354	Fc-C:8
					Y	377	355	Fc-C:9
					T	378	356	Fc-C:10
					L	379	357	Fc-C:11
					P	380	358	Fc-C:12
					P	381	359	Fc-C:13
					-	381.1	359.1	Fc-C:14
					S	382	360	Fc-C:15
					R	383	361	Fc-C:16
					D	384	362	Fc-C:17
					-	384.1	362.1	Fc-C:18
					E	385	363	Fc-C:19
					L	386	364	Fc-C:20
					-	386.1	364.1	Fc-C:21
					-	386.2	364.2	Fc-C:22
					T	387	365	Fc-C:23
					K	388	366	Fc-C:24
					N	389	367	Fc-C:25
					Q	390	368	Fc-C:26
					V	391	369	Fc-C:27
					S	392	370	Fc-C:28
					L	393	371	Fc-C:29
					T	394	372	Fc-C:30
					C	395	373	Fc-C:31
					L	396	374	Fc-C:32
					V	397	375	Fc-C:33
					K	398	376	Fc-C:34
					G	399	377	Fc-C:35
					F	400	378	Fc-C:36
					Y	401	379	Fc-C:37
					P	402	380	Fc-C:38
					-	402.1	380.1	Fc-C:39
					-	402.2	380.2	Fc-C:40
					S	403	381	Fc-C:41
					D	404	382	Fc-C:42
					I	405	383	Fc-C:43
					A	406	384	Fc-C:44
					V	407	385	Fc-C:45
					E	408	386	Fc-C:46
					W	409	387	Fc-C:47
					-	409.1	387.1	Fc-C:48
					E	410	388	Fc-C:49
					S	411	389	Fc-C:50
					N	412	390	Fc-C:51
					G	413	391	Fc-C:52
					Q	414	392	Fc-C:53
					P	415	393	Fc-C:54
					-	415.1	393.1	Fc-C:55
					-	415.2	393.2	Fc-C:56
					E	416	394	Fc-C:57
					N	417	395	Fc-C:58
					N	418	396	Fc-C:59
					Y	419	397	Fc-C:60
					K	420	398	Fc-C:61
					T	421	399	Fc-C:62
					T	422	400	Fc-C:63
					P	423	401	Fc-C:64
					P	424	402	Fc-C:65
					V	425	403	Fc-C:66
					L	426	404	Fc-C:67
					D	427	405	Fc-C:68
					-	427.1	405.1	Fc-C:69
					-	427.2	405.2	Fc-C:70
					-	427.3	405.3	Fc-C:71
					-	427.4	405.4	Fc-C:72
					S	428	406	Fc-C:73
					D	429	407	Fc-C:74
					G	430	408	Fc-C:75
					S	431	409	Fc-C:76
					F	432	410	Fc-C:77
					F	433	411	Fc-C:78
					L	434	412	Fc-C:79
					Y	435	413	Fc-C:80
					S	436	414	Fc-C:81
					K	437	415	Fc-C:82
					L	438	416	Fc-C:83
					T	439	417	Fc-C:84
					V	440	418	Fc-C:85
					D	441	419	Fc-C:86
					K	442	420	Fc-C:87
					S	443	421	Fc-C:88
					R	444	422	Fc-C:89
					W	445	423	Fc-C:90
					-	445.1	423.1	Fc-C:91
					Q	446	424	Fc-C:92
					Q	447	425	Fc-C:93
					G	448	426	Fc-C:94
					N	449	427	Fc-C:95
					V	450	428	Fc-C:96
					-	450.1	428.1	Fc-C:97
					-	450.2	428.2	Fc-C:98
					F	451	429	Fc-C:99
					S	452	430	Fc-C:100
					C	453	431	Fc-C:101
					S	454	432	Fc-C:102
					V	455	433	Fc-C:103
					L	456	434	Fc-C:104
					H	457	435	Fc-C:105
					E	458	436	Fc-C:106
					A	459	437	Fc-C:107
					L	460	438	Fc-C:108
					H	461	439	Fc-C:109
					-	461.1	439.1	Fc-C:110
					-	461.2	439.2	Fc-C:111
					S	462	440	Fc-C:112
					H	463	441	Fc-C:113
					Y	464	442	Fc-C:114
					T	465	443	Fc-C:115
					-	465.1	443.1	Fc-C:116
					Q	466	444	Fc-C:117
					K	467	445	Fc-C:118
					S	468	446	Fc-C:119
					L	469	447	Fc-C:120
					S	470	448	Fc-C:121
					L	471	449	Fc-C:122
					S	472	450	Fc-C:123
					P	473	451	HCnst-Po:1
					G	474	452	HCnst-Po:2
					K	475	453	HCnst-Po:3
					-	475.1	453.1	HCnst-Po:4
					-	475.2	453.2	HCnst-Po:5
					-	475.3	453.3	HCnst-Po:6
					-	475.4	453.4	HCnst-Po:7
					-	475.5	453.5	HCnst-Po:8
					-	475.6	453.6	HCnst-Po:9
					-	475.7	453.7	HCnst-Po:10
					-	475.8	453.8	HCnst-Po:11
					-	475.9	453.9	HCnst-Po:12
					-	475.10	453.10	HCnst-Po:13
					-	475.11	453.11	HCnst-Po:14
					-	475.12	453.12	HCnst-Po:15
					-	475.13	453.13	HCnst-Po:16
					-	475.14	453.14	HCnst-Po:17
					-	475.15	453.15	HCnst-Po:18
					-	475.16	453.16	HCnst-Po:19
					-	475.17	453.17	HCnst-Po:20
					-	475.18	453.18	HCnst-Po:21
					-	475.19	453.19	HCnst-Po:22
					-	475.20	453.20	HCnst-Po:23
					-	475.21	453.21	HCnst-Po:24
					-	475.22	453.22	HCnst-Po:25
					-	475.23	453.23	HCnst-Po:26
					-	475.24	453.24	HCnst-Po:27
					-	475.25	453.25	HCnst-Po:28
					-	475.26	453.26	HCnst-Po:29
					-	475.27	453.27	HCnst-Po:30
					-	475.28	453.28	HCnst-Po:31
					-	475.29	453.29	HCnst-Po:32
					-	475.30	453.30	HCnst-Po:33
					-	475.31	453.31	HCnst-Po:34
					-	475.32	453.32	HCnst-Po:35
					-	475.33	453.33	HCnst-Po:36
					-	475.34	453.34	HCnst-Po:37
					-	475.35	453.35	HCnst-Po:38
					-	475.36	453.36	HCnst-Po:39
					-	475.37	453.37	HCnst-Po:40
					-	475.38	453.38	HCnst-Po:41
					-	475.39	453.39	HCnst-Po:42
					-	475.40	453.40	HCnst-Po:43
					-	475.41	453.41	HCnst-Po:44
					-	475.42	453.42	HCnst-Po:45
					-	475.43	453.43	HCnst-Po:46
					-	475.44	453.44	HCnst-Po:47
					-	475.45	453.45	HCnst-Po:48
					-	475.46	453.46	HCnst-Po:49
					-	475.47	453.47	HCnst-Po:50
					-	475.48	453.48	HCnst-Po:51
					-	475.49	453.49	HCnst-Po:52
					-	475.50	453.50	HCnst-Po:53
					-	475.51	453.51	HCnst-Po:54
					-	475.52	453.52	HCnst-Po:55
					-	475.53	453.53	HCnst-Po:56
					-	475.54	453.54	HCnst-Po:57
					-	475.55	453.55	HCnst-Po:58
					-	475.56	453.56	HCnst-Po:59
					-	475.57	453.57	HCnst-Po:60
					-	475.58	453.58	HCnst-Po:61
					-	475.59	453.59	HCnst-Po:62
					-	475.60	453.60	HCnst-Po:63
					-	475.61	453.61	HCnst-Po:64
					-	475.62	453.62	HCnst-Po:65
					-	475.63	453.63	HCnst-Po:66
					-	475.64	453.64	HCnst-Po:67
					-	475.65	453.65	HCnst-Po:68
					-	475.66	453.66	HCnst-Po:69
					-	475.67	453.67	HCnst-Po:70
					-	475.68	453.68	HCnst-Po:71
					-	475.69	453.69	HCnst-Po:72
					-	475.70	453.70	HCnst-Po:73
					-	475.71	453.71	HCnst-Po:74
					-	475.72	453.72	HCnst-Po:75
					-	475.73	453.73	HCnst-Po:76
					-	475.74	453.74	HCnst-Po:77
					-	475.75	453.75	HCnst-Po:78
					-	475.76	453.76	HCnst-Po:79
					-	475.77	453.77	HCnst-Po:80
					-	475.78	453.78	HCnst-Po:81
					-	475.79	453.79	HCnst-Po:82
					-	475.80	453.80	HCnst-Po:83
					-	475.81	453.81	HCnst-Po:84
					-	475.82	453.82	HCnst-Po:85
					-	475.83	453.83	HCnst-Po:86
					-	475.84	453.84	HCnst-Po:87
					-	475.85	453.85	HCnst-Po:88
					-	475.86	453.86	HCnst-Po:89
					-	475.87	453.87	HCnst-Po:90
					-	475.88	453.88	HCnst-Po:91
					-	475.89	453.89	HCnst-Po:92
					-	475.90	453.90	HCnst-Po:93
					-	475.91	453.91	HCnst-Po:94
					-	475.92	453.92	HCnst-Po:95
					-	475.93	453.93	HCnst-Po:96
					-	475.94	453.94	HCnst-Po:97
					-	475.95	453.95	HCnst-Po:98
					-	475.96	453.96	HCnst-Po:99
					-	475.97	453.97	HCnst-Po:100
					-	475.98	453.98	HCnst-Po:101
					-	475.99	453.99	HCnst-Po:102
					-	475.100	453.100	HCnst-Po:103
					-	475.101	453.101	HCnst-Po:104
					-	475.102	453.102	HCnst-Po:105
					-	475.103	453.103	HCnst-Po:106
					-	475.104	453.104	HCnst-Po:107
					-	475.105	453.105	HCnst-Po:108
					-	475.106	453.106	HCnst-Po:109
					-	475.107	453.107	HCnst-Po:110
					-	475.108	453.108	HCnst-Po:111
					-	475.109	453.109	HCnst-Po:112
					-	475.110	453.110	HCnst-Po:113
					-	475.111	453.111	HCnst-Po:114
					-	475.112	453.112	HCnst-Po:115
					-	475.113	453.113	HCnst-Po:116
					-	475.114	453.114	HCnst-Po:117
					-	475.115	453.115	HCnst-Po:118
					-	475.116	453.116	HCnst-Po:119
					-	475.117	453.117	HCnst-Po:120
					-	475.118	453.118	HCnst-Po:121
					-	475.119	453.119	HCnst-Po:122
					-	475.120	453.120	HCnst-Po:123
