# Supplementary material for: An antibody drug engineered for prevention of malaria in global populations
Source: Research Square preprint supplement (doi:10.21203/rs.3.rs-2678519/v1), 2023-04-04
Supplement: Supplementary file 6 [file bf4bbc9fbc087c09606c8015.xlsx]

## Sheet: Supplementary Table 1
Supplementary Table 1 | Plasmablasts isolated and sequenced from PBMC of RTS,S vaccinees
		Number of PB Sequenced			P3D sample				P4D sample				CHMI status
Vaccinee ID	RTS,S dose	P3D Sample	P4D Sample		% PB/B cells	% PB/PBMC	% B cells/PBMC		% PB/B cells	% PB/PBMC	% B cells/PBMC		P3D	P4D
1	Fx017M	263	NA		0.612	0.034	5.629		NA	NA	NA		P	NA
3	Fx017M	672	539		4.415	0.253	5.738		3.687	0.296066	8.03		P	P
5	Fx017M	620	944		4.052	0.223	5.507		1.309	0.116108	8.87		P	P
6	Fx017M	520	NA		1.039	0.056	5.344		NA	NA	NA		P	NA
7	Fx017M	374	811		0.563	0.056	9.986		0.477	0.0541395	11.35		P	P
8	Fx017M	596	NA		0.862	0.063	7.329		NA	NA	NA		P	NA
14	Fx017M	536	735		2.052	0.158	7.696		0.733	0.0708811	9.67		P	NP
15	Fx017M	529	NA		1.506	0.146	9.676		NA	NA	NA		P	NA
16	Fx017M	136	358		0.627	0.027	4.242		0.965	0.0408195	4.23		P	P
22	Fx017M	476	NA		2.042	0.237	11.608		NA	NA	NA		P	NA
23	Fx017M	586	NA		1.179	0.112	9.497		NA	NA	NA		NP	NA
24	Fx017M	491	NA		0.569	0.026	4.49		NA	NA	NA		P	NA
25	Fx017M	626	5		5.864	0.273	4.657		0.687	0.0436932	6.36		NP	P
26	Fx017M	516	NA		0.846	0.078	9.237		NA	NA	NA		P	NA
29	Fx017M	574	NA		0.686	0.053	7.734		NA	NA	NA		P	NA
34	Fx017M	735	432		1.499	0.127	8.457		0.888	0.0854256	9.62		P	P
38	Fx017M	397	NA		0.542	0.048	8.872		NA	NA	NA		P	NA
39	Fx017M	693	NA		1.771	0.084	4.731		NA	NA	NA		P	NA
40	Fx017M	685	NA		3.077	0.171	5.56		NA	NA	NA		P	NA
41	Fx017M	606	84		0.63	0.042	6.65		0.209	0.0186219	8.91		P	P
46	Fx017M	474	769		9.787	0.522	5.334		3.654	0.1678	4.591		P	P
48	Fx017M	583	NA		3.697	0.091	2.45		NA	NA	NA		P	NA
49	Fx017M	569	NA		1.361	0.106	7.777		NA	NA	NA		NP	NA
51	Fx017M	607	NA		1.972	0.131	6.642		NA	NA	NA		P	NA
52	Fx017M	401	NA		0.726	0.026	3.554		NA	NA	NA		P	NA
53	Fx017M	565	842		0.724	0.032	4.467		0.664	0.0518584	7.81		P	P
54	Fx017M	236	1027		0.838	0.034	4.114		1.114	0.0715188	6.42		NP	P
60	Fx017M	632	NA		1.262	0.061	4.816		NA	NA	NA		P	NA
63	Fx017M	206	NA		0.709	0.015	2.12		NA	NA	NA		P	NA
64	Fx017M	940	777		2.467	0.114	4.64		1.692	0.112687	6.66		P	P
201	012M	167	NA		1.381	0.097	7.027		NA	NA	NA		P	NA
202	012M	402	653		8.98	0.425	4.736		1.126	0.0657584	5.84		NP	NP
203	012M	592	923		2.412	0.131	5.425		2.293	0.144	6.28		P	NP
205	012M	193	511		1.049	0.062	5.87		0.663	0.0661674	9.98		P	NP
207	012M	469	177		1.274	0.039	3.098		0.97	0.031816	3.28		P	P
208	012M	425	NA		1.285	0.083	6.448		NA	NA	NA		NP	NA
209	012M	324	NA		0.918	0.063	6.878		NA	NA	NA		P	NA
216	012M	430	NA		1.458	0.15	10.302		NA	NA	NA		P	NA
221	012M	385	NA		1.067	0.131	12.266		NA	NA	NA		P	NA
228	012M	509	477		4.864	0.27	5.556		2.083	0.137478	6.6		NP	P
229	012M	561	NA		1.017	0.059	5.764		NA	NA	NA		P	NA
230	012M	482	385		1.618	0.091	5.597		0.647	0.0357	5.527		NP	P
233	012M	561	180		2.233	0.161	7.229		0.521	0.0312079	5.99		P	NP
234	012M	403	NA		2.127	0.071	3.34		NA	NA	NA		NP	NA
236	012M	572	NA		1.35	0.09	6.663		NA	NA	NA		P	NA
														NA, not applicable; P, protected; NP, not protected; P3D, post-third dose RTS,S; P4D, post-fourth dose RTS,S
