# Supplementary material for: An antibody drug engineered for prevention of malaria in global populations
Source: Research Square preprint supplement (doi:10.21203/rs.3.rs-2678519/v1), 2023-04-04
Supplement: Supplementary file 7 [file bfb1894a81fa262e31b0e42c.xlsx]

## Sheet: Supplementary Table 4
Supplementary Table 4 | Properties of screened PB mAb clones within origin lineages of selected clone
					Selection criteria of clone within lineage
mAb ID	P3D CHMI	Vaccinee ID	Lineage		Dominant clonea	Convergent clonea	Leafiest decent clonea,b	Most mutated clonea,b		SHM (H+L)
AB-000270	P	41	IGHV1-18/11/IGLV10-54/12/0		1	1	1	1		46
AB-000286	P	46	IGHV3-21/17/IGLV8-61/11/0		1	1	1	1		37
AB-000304	P	53	IGHV3-30/7/IGLV3-27/11/0		1	1	1	1		28
AB-000306	P	53	IGHV6-1/7/IGKV4-1/10/0		1	1	1	1		52
AB-000312	P	29	IGHV3-21/17/IGLV3-1/10/0		1	1	1	1		26
AB-000313	P	51	IGHV3-33/17/IGKV1-5/9/0		1	1	1	1		6
AB-000321	P	203	IGHV3-23/10/IGKV2-30/10/0		1	1	1	1		53
AB-000332	P	46	IGHV3-30/14/IGKV2-30/10/0		1	1	1	1		30
AB-000356	P	52	IGHV3-33/18/IGKV3-15/9/0		1	1	1	1		35
AB-000372	P	233	IGHV6-1/13/IGKV2-28/10/0		1	1	1	1		50
AB-001387	P	236	IGHV3-33/18/IGLV1-40/12/0		1	1	1	1		5
AB-001400	P	233	IGHV1-69/18/IGKV1-16/10/0		1	1	1	1		22
AB-001424	NP	54	IGHV3-48/16/IGKV3-15/10/0		1	1	1	1		45
AB-001450	P	209	IGHV7-4-1/13/IGKV4-1/10/0		1	1	1	1		11
AB-001457	P	207	IGHV3-21/18/IGKV3-20/9/0		1	1	1	1		14
AB-001465	NP	234	IGHV5-51/15/IGKV2-30/10/0		1	1	1	1		6
AB-001467	P	201	IGHV3-33/17/IGKV3-11/9/0		1	1	1	1		4
AB-001468	NP	230	IGHV3-33/18/IGKV1-5/9/0		1	1	1	1		11
AB-001476	NP	208	IGHV1-8/19/IGLV9-49/14/0		1	1	1	1		4
AB-001480	P	201	IGHV3-33/17/IGKV1-5/9/1		1	1	1	1		15
AB-001529	P	52	IGHV3-33/17/IGKV1-5/9/2		1	1	1	1		17
AB-001554	P	216	IGHV3-33/18/IGKV2-30/10/0		1	1	1	1		7
AB-001566	NP	23	IGHV3-33/17/IGKV3-15/9/0		1	1	1	1		17
AB-000317	P	29	IGHV3-30/13/IGKV1-5/10/0		1	1	1	1 (tie)		31
AB-000371	P	233	IGHV3-48/16/IGKV3-15/10/0		1	1	1	1 (tie)		47
AB-001526	P	48	IGHV3-33/18/IGKV3D-11/10/0		1	1	1	1 (tie)		26
AB-000315	P	63	IGHV3-33/19/IGKV1-5/9/0		1	1	1	0		22
AB-001567	P	229	IGHV3-21/14/IGKV3-11/10/0		1	1	1 (tie)	1		7
AB-000280	P	24	IGHV3-30/8/IGLV3-27/11/0		1	1	0	1		40
AB-000284	P	63	IGHV3-30/8/IGLV3-27/11/0		1	1	0	1		43
AB-000307	P	29	IGHV3-30/12/IGKV1-39/10/0		1	1	0	1		35
AB-000309	P	5	IGHV3-23/14/IGKV3-20/10/0		1	1	0	1		53
AB-000314	P	5	IGHV3-33/18/IGKV1-5/9/1		1	1	0	1		19
AB-000324	P	205	IGHV3-33/15/IGLV3-21/12/1		1	1	0	1		28
AB-000354	P	53	IGHV3-30/8/IGLV3-27/11/0		1	1	0	1		29
AB-000370	P	63	IGHV1-2/14/IGKV4-1/9/0		1	1	0	1		30
AB-000377	P	14	IGHV4-39/21/IGLV1-40/12/0		1	1	0	1		37
AB-000384	P	24	IGHV3-30/13/IGLV3-25/12/0		1	1	0	1		33
AB-001395	NP	202	IGHV3-33/17/IGLV6-57/7/0		1	1	0	1		27
AB-001404	P	207	IGHV3-33/19/IGKV1-5/9/2		1	1	0	1		1
AB-001437	NP	49	IGHV3-23/16/IGLV1-51/12/0		1	1	0	1		32
AB-001439	NP	23	IGHV3-33/18/IGLV1-40/12/0		1	1	0	1		12
AB-001448	P	233	IGHV3-15/14/IGLV3-1/10/1		1	1	0	1		7
AB-001536	P	6	IGHV3-49/13/IGKV2D-29/10/0		1	1	0	1		13
AB-001545	P	203	IGHV3-33/15/IGKV3-11/9/0		1	1	0	1		0
AB-001547	P	209	IGHV5-51/16/IGKV2-30/10/0		1	1	0	1		11
AB-001553	NP	54	IGHV3-33/15/IGKV1-39/11/2		1	1	0	1		50
AB-001555	NP	234	IGHV3-30/17/IGKV1-5/9/0		1	1	0	1		2
AB-001560	NP	208	IGHV3-30/13/IGLV3-25/12/0		1	1	0	1		11
AB-001574	NP	49	IGHV3-30/13/IGKV1-5/11/0		1	1	0	1		21
AB-001472	P	233	IGHV3-33/19/IGKV1-5/9/2		1	1	0	1 (tie)		6
AB-000337	P	63	IGHV3-33/18/IGKV3-15/9/0		1	1	0	0		28
AB-000349	P	39	IGHV3-7/7/IGKV2D-29/10/0		1	1	0	0		31
AB-000212	P	3	IGHV3-73/15/IGLV10-54/12/0		1	0	1	1		39
AB-000213	P	3	IGHV3-73/16/IGLV10-54/12/0		1	0	1	1		33
AB-000214	P	3	IGHV2-5/12/IGLV5-45/10/0		1	0	1	1		51
AB-000215	P	64	IGHV3-73/18/IGKV4-1/10/0		1	0	1	1		53
AB-000216	P	3	IGHV3-7/11/IGLV10-54/12/0		1	0	1	1		60
AB-000217	P	64	IGHV3-73/10/IGKV4-1/10/0		1	0	1	1		59
AB-000221	P	40	IGHV3-23/22/IGKV2-40/10/0		1	0	1	1		41
AB-000244	P	1	IGHV3-23/9/IGLV3-19/12/0		1	0	1	1		72
AB-000259	P	6	IGHV3-11/13/IGKV1-5/9/0		1	0	1	1		41
AB-000262	P	24	IGHV2-5/14/IGLV5-45/10/0		1	0	1	1		34
AB-000263	P	22	IGHV3-66/18/IGLV5-45/10/0		1	0	1	1		48
AB-000265	P	209	IGHV3-30/8/IGLV10-54/12/0		1	0	1	1		20
AB-000269	P	34	IGHV3-73/15/IGKV4-1/10/0		1	0	1	1		25
AB-000271	P	64	IGHV3-73/18/IGKV3-11/11/0		1	0	1	1		45
AB-000272	P	64	IGHV4-39/11/IGLV5-45/10/0		1	0	1	1		21
AB-000275	P	51	IGHV3-66/21/IGLV8-61/11/0		1	0	1	1		52
AB-000278	P	48	IGHV3-66/15/IGLV8-61/11/0		1	0	1	1		48
AB-000279	P	52	IGHV1-3/16/IGLV1-40/12/0		1	0	1	1		42
AB-000293	P	51	IGHV3-7/10/IGKV2-24/10/0		1	0	1	1		48
AB-000295	P	60	IGHV1-3/20/IGLV1-40/13/0		1	0	1	1		66
AB-000297	P	60	IGHV3-30/7/IGLV3-27/11/0		1	0	1	1		40
AB-000298	P	3	IGHV3-49/11/IGKV1-17/10/1		1	0	1	1		35
AB-000299	P	48	IGHV3-72/15/IGKV2-24/10/0		1	0	1	1		61
AB-000302	P	203	IGHV6-1/11/IGKV4-1/10/0		1	0	1	1		44
AB-000303	P	52	IGHV3-15/7/IGLV3-27/10/0		1	0	1	1		26
AB-000319	P	16	IGHV4-34/22/IGKV3-20/10/0		1	0	1	1		28
AB-000320	P	221	IGHV3-33/15/IGKV1-33/9/0		1	0	1	1		33
AB-000327	P	63	IGHV3-33/20/IGLV1-40/13/0		1	0	1	1		40
AB-000328	P	201	IGHV5-51/16/IGKV4-1/9/0		1	0	1	1		49
AB-000340	P	8	IGHV4-39/19/IGLV1-40/12/0		1	0	1	1		37
AB-000342	P	5	IGHV4-59/16/IGLV1-44/12/0		1	0	1	1		45
AB-000346	P	8	IGHV1-46/13/IGLV2-18/11/0		1	0	1	1		67
AB-000347	P	7	IGHV3-23/17/IGLV3-21/12/1		1	0	1	1		53
AB-000348	P	14	IGHV4-39/10/IGKV1-39/10/0		1	0	1	1		118
AB-000351	P	7	IGHV1-18/17/IGKV1-5/12/0		1	0	1	1		38
AB-000355	P	52	IGHV3-74/17/IGLV2-14/11/0		1	0	1	1		51
AB-000357	P	60	IGHV1-69/17/IGKV3-15/11/0		1	0	1	1		51
AB-000358	P	203	IGHV4-39/23/IGKV3-20/10/0		1	0	1	1		42
AB-000359	P	16	IGHV3-49/18/IGKV2-24/10/0		1	0	1	1		44
AB-000360	P	22	IGHV3-49/19/IGKV1-12/10/0		1	0	1	1		44
AB-000361	P	205	IGHV3-23/17/IGLV3-21/12/0		1	0	1	1		31
AB-000364	P	29	IGHV3-33/13/IGKV1-5/9/0		1	0	1	1		27
AB-000365	P	53	IGHV4-39/19/IGLV4-69/10/0		1	0	1	1		41
AB-000368	P	24	IGHV3-23/23/IGKV1-27/10/0		1	0	1	1		25
AB-000373	P	34	IGHV3-33/14/IGKV2-29/9/0		1	0	1	1		27
AB-000374	P	3	IGHV3-20/15/IGLV2-8/11/0		1	0	1	1		46
AB-000375	P	60	IGHV1-3/17/IGKV1-5/11/0		1	0	1	1		68
AB-000376	P	60	IGHV3-33/16/IGKV1-5/9/1		1	0	1	1		33
AB-000378	P	22	IGHV3-48/17/IGKV1-5/10/0		1	0	1	1		57
AB-000383	P	7	IGHV3-23/22/IGKV1-39/10/0		1	0	1	1		50
AB-000385	P	24	IGHV4-39/19/IGKV1-9/11/0		1	0	1	1		34
AB-000386	P	51	IGHV3-21/17/IGLV1-40/11/0		1	0	1	1		30
AB-000387	P	221	IGHV1-2/16/IGLV2-8/11/0		1	0	1	1		36
AB-000388	P	229	IGHV1-18/11/IGLV1-51/13/0		1	0	1	1		39
AB-000395	P	14	IGHV3-33/16/IGKV1-5/9/0		1	0	1	1		19
AB-000400	P	7	IGHV4-4/14/IGLV1-40/12/0		1	0	1	1		46
AB-001388	NP	230	IGHV3-33/12/IGKV3-20/9/0		1	0	1	1		18
AB-001394	NP	208	IGHV2-26/22/IGLV2-23/11/0		1	0	1	1		28
AB-001397	NP	208	IGHV3-53/13/IGLV2-14/12/0		1	0	1	1		44
AB-001398	P	216	IGHV3-23/16/IGKV1-33/10/0		1	0	1	1		41
AB-001402	P	216	IGHV1-69/17/IGLV3-25/13/0		1	0	1	1		57
AB-001407	NP	228	IGHV3-30/19/IGKV3-15/9/0		1	0	1	1		35
AB-001408	P	205	IGHV4-38-2/19/IGKV3-15/12/0		1	0	1	1		2
AB-001411	NP	230	IGHV3-33/17/IGKV2-28/9/0		1	0	1	1		3
AB-001413	P	203	IGHV3-33/18/IGKV1-5/9/0		1	0	1	1		9
AB-001416	NP	49	IGHV3-7/11/IGLV3-1/10/0		1	0	1	1		35
AB-001418	P	236	IGHV1-8/18/IGLV1-44/11/0		1	0	1	1		35
AB-001419	P	209	IGHV3-30/29/IGLV3-19/12/0		1	0	1	1		7
AB-001420	P	203	IGHV1-18/21/IGKV3-20/10/0		1	0	1	1		27
AB-001425	P	236	IGHV3-30/27/IGKV4-1/10/0		1	0	1	1		6
AB-001426	P	236	IGHV3-33/17/IGKV1-5/9/0		1	0	1	1		2
AB-001427	P	205	IGHV3-48/13/IGKV1-39/10/0		1	0	1	1		4
AB-001434	P	203	IGHV3-33/14/IGKV2-24/9/0		1	0	1	1		3
AB-001435	NP	23	IGHV3-33/18/IGKV1-5/9/0		1	0	1	1		8
AB-001440	NP	54	IGHV3-23/19/IGLV9-49/14/0		1	0	1	1		1
AB-001442	NP	230	IGHV4-4/19/IGKV3-11/11/0		1	0	1	1		33
AB-001443	NP	208	IGHV3-33/20/IGKV1-5/9/0		1	0	1	1		9
AB-001445	NP	228	IGHV4-38-2/15/IGKV3-20/11/0		1	0	1	1		98
AB-001451	NP	23	IGHV3-15/10/IGLV2-14/9/0		1	0	1	1		75
AB-001453	NP	202	IGHV3-74/23/IGLV3-10/11/0		1	0	1	1		6
AB-001456	P	205	IGHV2-70D/14/IGKV1-39/10/0		1	0	1	1		16
AB-001460	NP	228	IGHV3-7/15/IGKV3-11/10/0		1	0	1	1		25
AB-001461	P	236	IGHV3-74/16/IGLV2-14/12/0		1	0	1	1		59
AB-001462	NP	54	IGHV3-33/21/IGKV1-16/10/0		1	0	1	1		5
AB-001470	P	229	IGHV5-51/15/IGKV1-39/10/0		1	0	1	1		30
AB-001473	NP	23	IGHV3-66/14/IGKV3-20/11/0		1	0	1	1		43
AB-001474	NP	49	IGHV1-2/13/IGKV2-28/10/0		1	0	1	1		18
AB-001482	NP	230	IGHV3-33/16/IGKV1-5/9/1		1	0	1	1		21
AB-001484	NP	25	IGHV3-74/19/IGKV3-11/13/0		1	0	1	1		26
AB-001485	NP	25	IGHV3-21/12/IGLV1-44/13/0		1	0	1	1		30
AB-001488	NP	228	IGHV3-21/15/IGLV3-1/10/0		1	0	1	1		9
AB-001489	NP	228	IGHV1-2/11/IGKV1-5/11/0		1	0	1	1		97
AB-001493	NP	23	IGHV3-33/16/IGLV1-40/12/0		1	0	1	1		2
AB-001499	NP	208	IGHV5-51/12/IGKV3-15/10/0		1	0	1	1		42
AB-001502	NP	228	IGHV3-21/16/IGLV3-21/10/0		1	0	1	1		44
AB-001504	NP	202	IGHV4-39/22/IGKV3-15/10/0		1	0	1	1		12
AB-001505	P	216	IGHV3-48/14/IGLV2-23/11/0		1	0	1	1		7
AB-001506	NP	234	IGHV3-21/19/IGLV2-23/12/0		1	0	1	1		48
AB-001508	NP	208	IGHV3-33/16/IGKV4-1/11/0		1	0	1	1		13
AB-001512	NP	54	IGHV3-30/26/IGKV2-28/10/0		1	0	1	1		37
AB-001514	P	207	IGHV3-9/14/IGKV4-1/10/0		1	0	1	1		7
AB-001520	NP	23	IGHV3-7/9/IGKV3-20/10/0		1	0	1	1		67
AB-001521	P	38	IGHV3-21/15/IGKV3-15/11/0		1	0	1	1		45
AB-001523	P	1	IGHV3-33/10/IGKV1-17/10/0		1	0	1	1		53
AB-001524	P	1	IGHV3-7/13/IGKV3-20/10/0		1	0	1	1		52
AB-001527	P	48	IGHV4-34/20/IGLV3-19/13/0		1	0	1	1		45
AB-001530	P	52	IGHV3-53/17/IGLV2-8/11/0		1	0	1	1		23
AB-001531	P	16	IGHV3-33/22/IGKV1-5/9/0		1	0	1	1		18
AB-001537	P	1	IGHV3-33/17/IGKV1-5/9/1		1	0	1	1		2
AB-001538	P	1	IGHV3-23/12/IGKV4-1/10/0		1	0	1	1		9
AB-001539	P	1	IGHV3-43/14/IGLV3-21/12/0		1	0	1	1		24
AB-001540	P	216	IGHV3-33/12/IGKV4-1/10/1		1	0	1	1		8
AB-001541	P	229	IGHV3-33/16/IGKV1-39/9/0		1	0	1	1		4
AB-001542	NP	234	IGHV3-15/10/IGLV7-43/10/0		1	0	1	1		27
AB-001549	P	209	IGHV3-30/23/IGLV3-19/12/0		1	0	1	1		12
AB-001558	P	209	IGHV3-33/18/IGKV3-15/9/0		1	0	1	1		12
AB-001561	P	207	IGHV3-33/17/IGKV2-24/9/0		1	0	1	1		7
AB-001562	P	205	IGHV3-23/13/IGLV2-14/11/0		1	0	1	1		24
AB-001565	P	229	IGHV1-2/15/IGKV1-39/9/0		1	0	1	1		51
AB-001571	P	233	IGHV3-30/22/IGKV3-15/9/0		1	0	1	1		9
AB-001572	NP	234	IGHV3-33/15/IGKV2-29/9/0		1	0	1	1		7
AB-001575	NP	202	IGHV1-3/27/IGKV1-39/11/0		1	0	1	1		8
AB-000363	P	15	IGHV1-18/16/IGKV1-39/10/0		1	0	1	1 (tie)		44
AB-000399	P	5	IGHV3-49/13/IGKV2D-29/10/0		1	0	1	1 (tie)		28
AB-001455	P	216	IGHV3-33/16/IGKV2-30/9/0		1	0	1	1 (tie)		14
AB-001525	P	1	IGHV3-11/18/IGLV3-1/10/0		1	0	1	1 (tie)		34
AB-001573	NP	202	IGHV3-33/17/IGKV1-12/10/0		1	0	1	1 (tie)		7
AB-000331	P	16	IGHV3-7/17/IGLV1-44/12/0		1	0	1	0		40
AB-000394	P	14	IGHV3-33/16/IGKV3-11/9/0		1	0	1 (tie)	1		30
AB-001412	NP	228	IGHV4-39/20/IGLV2-14/12/0		1	0	1 (tie)	1		21
AB-001423	NP	49	IGHV4-39/19/IGKV3-11/12/0		1	0	1 (tie)	1		34
AB-001433	NP	208	IGHV4-34/24/IGLV3-19/11/0		1	0	1 (tie)	1		48
AB-001447	NP	234	IGHV4-39/19/IGLV4-69/11/0		1	0	1 (tie)	1		35
AB-001469	NP	202	IGHV4-59/15/IGKV1-39/10/0		1	0	1 (tie)	1		46
AB-001486	NP	23	IGHV3-33/20/IGKV1-5/9/0		1	0	1 (tie)	1		25
AB-001507	P	207	IGHV3-20/15/IGKV1-5/10/0		1	0	1 (tie)	1		33
AB-001519	NP	208	IGHV4-34/28/IGKV1-9/10/0		1	0	1 (tie)	1		63
AB-001534	P	38	IGHV3-21/20/IGKV3-20/9/0		1	0	1 (tie)	1		23
AB-000227	P	64	IGHV3-33/18/IGLV1-40/12/0		1	0	0	1		29
AB-000234	P	51	IGHV3-21/16/IGLV3-21/12/0		1	0	0	1		41
AB-000235	P	41	IGHV3-74/18/IGLV1-40/13/0		1	0	0	1		26
AB-000236	P	51	IGHV3-48/18/IGLV3-1/10/1		1	0	0	1		33
AB-000237	P	60	IGHV1-3/9/IGKV2-28/10/0		1	0	0	1		25
AB-000242	P	14	IGHV3-7/7/IGLV3-25/12/0		1	0	0	1		32
AB-000252	P	53	IGHV1-69/19/IGKV3-11/11/0		1	0	0	1		44
AB-000274	P	15	IGHV1-3/16/IGLV1-40/12/0		1	0	0	1		51
AB-000287	P	14	IGHV1-8/17/IGLV1-40/12/0		1	0	0	1		72
AB-000291	P	5	IGHV3-33/14/IGLV1-44/12/0		1	0	0	1		53
AB-000300	P	34	IGHV3-7/7/IGLV7-46/10/0		1	0	0	1		38
AB-000301	P	46	IGHV4-39/23/IGLV1-40/13/0		1	0	0	1		24
AB-000308	P	26	IGHV3-33/17/IGLV1-40/12/0		1	0	0	1		31
AB-000322	P	6	IGHV3-7/14/IGLV7-43/10/0		1	0	0	1		34
AB-000326	P	16	IGHV4-4/15/IGKV2-28/10/0		1	0	0	1		27
AB-000339	P	51	IGHV3-72/14/IGLV1-44/12/0		1	0	0	1		40
AB-000341	P	201	IGHV4-39/19/IGLV3-9/10/0		1	0	0	1		35
AB-000343	P	60	IGHV3-23/22/IGLV2-14/11/0		1	0	0	1		29
AB-000344	P	53	IGHV3-33/14/IGKV1-39/11/0		1	0	0	1		53
AB-000382	P	7	IGHV3-33/23/IGKV3-20/11/0		1	0	0	1		27
AB-000390	P	3	IGHV3-23/19/IGKV1-5/9/0		1	0	0	1		35
AB-000391	P	38	IGHV3-48/16/IGKV2-30/10/0		1	0	0	1		38
AB-000392	P	26	IGHV3-30/13/IGLV3-27/11/0		1	0	0	1		27
AB-000393	P	6	IGHV3-49/14/IGKV2D-29/10/0		1	0	0	1		25
AB-001390	P	203	IGHV3-33/18/IGKV2-28/9/0		1	0	0	1		2
AB-001393	NP	54	IGHV3-23/17/IGKV1-33/10/0		1	0	0	1		19
AB-001403	P	216	IGHV3-30/18/IGLV1-40/12/1		1	0	0	1		8
AB-001406	P	229	IGHV3-23/22/IGKV3-11/10/0		1	0	0	1		8
AB-001410	NP	23	IGHV3-33/17/IGKV1-5/9/0		1	0	0	1		23
AB-001414	P	205	IGHV1-18/22/IGLV2-23/12/0		1	0	0	1		36
AB-001415	NP	228	IGHV3-21/17/IGLV3-21/13/0		1	0	0	1		26
AB-001421	NP	25	IGHV3-15/14/IGKV2-28/10/0		1	0	0	1		40
AB-001429	P	207	IGHV3-33/18/IGLV1-40/13/0		1	0	0	1		7
AB-001436	P	216	IGHV3-33/20/IGKV4-1/9/0		1	0	0	1		0
AB-001444	NP	230	IGHV3-23/12/IGLV2-8/11/0		1	0	0	1		38
AB-001452	P	236	IGHV3-21/22/IGKV1D-13/10/0		1	0	0	1		34
AB-001459	NP	25	IGHV3-33/17/IGKV1-5/9/0		1	0	0	1		28
AB-001464	NP	230	IGHV3-74/17/IGKV1-5/10/0		1	0	0	1		46
AB-001479	NP	54	IGHV3-23/17/IGLV6-57/10/0		1	0	0	1		65
AB-001483	P	233	IGHV3-15/15/IGLV3-1/10/2		1	0	0	1		7
AB-001490	NP	208	IGHV7-4-1/13/IGLV4-69/10/0		1	0	0	1		23
AB-001491	NP	228	IGHV4-39/12/IGLV7-43/10/0		1	0	0	1		51
AB-001492	NP	49	IGHV3-30/17/IGKV1-9/10/0		1	0	0	1		26
AB-001496	P	207	IGHV3-30/19/IGLV2-11/11/0		1	0	0	1		33
AB-001497	P	205	IGHV1-69/16/IGKV3-15/11/0		1	0	0	1		2
AB-001498	P	216	IGHV3-21/20/IGLV1-44/12/0		1	0	0	1		39
AB-001500	P	209	IGHV3-49/15/IGLV2-14/12/0		1	0	0	1		7
AB-001501	P	236	IGHV4-4/13/IGKV3-20/10/0		1	0	0	1		58
AB-001503	NP	234	IGHV3-33/19/IGKV2-30/9/0		1	0	0	1		8
AB-001511	P	229	IGHV3-33/16/IGKV2-30/9/0		1	0	0	1		4
AB-001516	NP	54	IGHV3-30/24/IGLV1-40/12/0		1	0	0	1		41
AB-001532	P	16	IGHV3-33/15/IGLV2-14/6/0		1	0	0	1		29
AB-001535	P	6	IGHV3-49/14/IGKV3-11/9/0		1	0	0	1		12
AB-001546	NP	208	IGHV3-21/15/IGLV3-25/12/0		1	0	0	1		12
AB-001551	NP	234	IGHV3-49/13/IGKV3-15/9/0		1	0	0	1		10
AB-001552	P	233	IGHV3-15/13/IGLV3-1/11/0		1	0	0	1		7
AB-001559	NP	228	IGHV3-48/16/IGKV4-1/10/0		1	0	0	1		45
AB-001563	NP	25	IGHV3-30/19/IGKV3-15/11/0		1	0	0	1		38
AB-001569	P	209	IGHV3-33/14/IGKV1-16/10/0		1	0	0	1		10
AB-001576	NP	49	IGHV3-30/14/IGLV6-57/10/0		1	0	0	1		21
AB-000224	P	26	IGHV3-49/19/IGLV1-40/12/0		1	0	0	1 (tie)		41
AB-000289	P	40	IGHV7-4-1/20/IGKV3-11/9/0		1	0	0	1 (tie)		40
AB-000316	P	8	IGHV3-33/20/IGKV1-5/9/0		1	0	0	1 (tie)		28
AB-000367	P	60	IGHV3-21/18/IGLV3-1/11/0		1	0	0	1 (tie)		39
AB-000369	P	39	IGHV4-59/19/IGLV1-40/11/0		1	0	0	1 (tie)		29
AB-000398	P	24	IGHV3-23/16/IGLV3-10/14/0		1	0	0	1 (tie)		33
AB-001389	P	236	IGHV4-39/19/IGLV1-51/12/0		1	0	0	1 (tie)		30
AB-001431	P	229	IGHV3-7/21/IGKV1-33/9/0		1	0	0	1 (tie)		46
AB-001466	NP	23	IGHV3-11/18/IGKV3-15/10/1		1	0	0	1 (tie)		22
AB-001475	NP	234	IGHV1-69-2/20/IGLV9-49/14/0		1	0	0	1 (tie)		36
AB-000397	P	46	IGHV3-15/13/IGKV2-28/10/0		1	0	0	0		27
AB-000345	P	53	IGHV3-23/10/IGKV3-15/11/0		0	1	1	1		61
AB-001446	NP	49	IGHV1-8/19/IGLV9-49/14/0		0	1	1	1		30
AB-001515	NP	23	IGHV3-74/16/IGLV2-11/13/0		0	1	1	1		23
AB-001517	NP	230	IGHV3-33/15/IGKV2D-29/9/0		0	1	1	1		35
AB-001405	NP	54	IGHV3-33/15/IGKV2D-29/9/0		0	1	1 (tie)	1		16
AB-001481	P	236	IGHV3-33/16/IGKV2-30/11/0		0	1	1 (tie)	1		4
AB-001494	NP	49	IGHV3-9/13/IGLV1-51/12/0		0	1	1 (tie)	1		7
AB-001510	NP	230	IGHV3-33/17/IGKV1-5/9/0		0	1	1 (tie)	1		22
AB-000311	P	63	IGHV3-33/15/IGLV1-40/13/0		0	1	1 (tie)	0		29
AB-000219	P	34	IGHV4-39/23/IGLV1-40/12/0		0	1	0	1		30
AB-000254	P	26	IGHV3-74/16/IGLV2-11/12/0		0	1	0	1		24
AB-000268	P	8	IGHV3-15/15/IGLV10-54/12/0		0	1	0	1		28
AB-000305	P	34	IGHV4-39/21/IGLV1-40/12/0		0	1	0	1		53
AB-000310	P	3	IGHV3-30/11/IGKV1-39/10/0		0	1	0	1		34
AB-001409	NP	25	IGHV3-33/19/IGKV1-5/9/0		0	1	0	1		18
AB-001495	NP	234	IGHV3-33/18/IGLV1-40/12/0		0	1	0	1		7
AB-001544	NP	23	IGHV3-30/13/IGKV1-5/10/0		0	1	0	1		38
AB-001557	NP	230	IGHV3-33/19/IGLV1-40/12/0		0	1	0	1		13
AB-001564	P	233	IGHV3-21/14/IGLV1-44/12/0		0	1	0	1		13
AB-001568	NP	49	IGHV1-2/15/IGKV2-28/10/0		0	1	0	1		24
AB-000257	P	34	IGHV1-2/15/IGLV1-44/12/0		0	1	0	1 (tie)		41
AB-001401	NP	234	IGHV1-69/18/IGKV1-16/10/0		0	1	0	1 (tie)		27
AB-001428	P	209	IGHV3-33/17/IGKV1-5/9/0		0	1	0	1 (tie)		9
AB-000222	P	53	IGHV3-33/18/IGLV1-40/12/0		0	1	0	0		33
AB-000325	P	39	IGHV3-33/15/IGKV3-15/9/0		0	1	0	0		35
AB-000334	P	14	IGHV3-33/17/IGKV1-5/11/0		0	1	0	0		27
AB-000338	P	22	IGHV3-30/16/IGKV2-30/9/0		0	1	0	0		27
AB-000249	P	233	IGHV4-31/19/IGLV2-23/13/0		0	0	1	1		40
AB-000281	P	5	IGHV3-11/19/IGLV5-45/10/0		0	0	1	1		25
AB-000330	P	207	IGHV1-69/22/IGLV7-43/10/0		0	0	1	1		73
AB-001417	P	209	IGHV3-48/14/IGLV1-40/10/0		0	0	1	1		8
AB-001422	NP	230	IGHV3-21/21/IGLV2-14/11/0		0	0	1	1		42
AB-001438	NP	25	IGHV3-33/20/IGLV1-40/12/0		0	0	1	1		30
AB-001449	P	229	IGHV3-15/12/IGKV2-28/10/0		0	0	1	1		23
AB-001471	NP	49	IGHV3-30/19/IGKV3-15/9/0		0	0	1	1		25
AB-001518	NP	234	IGHV3-23/15/IGKV1-33/11/0		0	0	1	1		55
AB-001399	NP	202	IGHV4-31/24/IGKV1-5/11/0		0	0	1	1 (tie)		14
AB-001432	NP	202	IGHV1-18/23/IGKV3-11/10/0		0	0	1	1 (tie)		8
AB-001458	P	236	IGHV3-49/13/IGKV3-15/9/0		0	0	1	1 (tie)		10
AB-000285	P	34	IGHV4-61/10/IGLV7-46/12/0		0	0	1 (tie)	1		41
AB-000288	NP	25	IGHV2-5/17/IGLV1-40/13/0		0	0	1 (tie)	1		46
AB-000350	P	22	IGHV3-30/19/IGKV2-28/9/0		0	0	1 (tie)	1		31
AB-000366	P	221	IGHV1-2/15/IGKV1-39/9/0		0	0	1 (tie)	1		59
AB-000381	P	203	IGHV1-69-2/14/IGKV4-1/10/0		0	0	1 (tie)	1		30
AB-001441	P	203	IGHV4-4/15/IGKV3-20/10/0		0	0	1 (tie)	1		16
AB-001578	P	229	IGHV3-33/18/IGKV3-11/10/0		0	0	1 (tie)	1		8
AB-000380	P	203	IGHV3-15/21/IGLV5-39/12/0		0	0	1 (tie)	1 (tie)		70
AB-001550	NP	202	IGHV3-23/18/IGKV1-33/10/0		0	0	1 (tie)	1 (tie)		14
AB-000218	P	7	IGHV3-30/23/IGLV5-45/10/0		0	0	0	1		53
AB-000223	P	51	IGHV1-69/18/IGKV3-20/10/0		0	0	0	1		53
AB-000225	P	39	IGHV3-74/18/IGLV1-40/13/0		0	0	0	1		45
AB-000226	P	14	IGHV3-74/16/IGLV1-40/13/0		0	0	0	1		37
AB-000228	P	38	IGHV3-23/15/IGLV1-40/12/0		0	0	0	1		48
AB-000229	P	8	IGHV3-33/20/IGKV1-9/10/0		0	0	0	1		46
AB-000230	P	64	IGHV4-59/28/IGLV1-40/12/0		0	0	0	1		54
AB-000232	P	39	IGHV3-23/22/IGKV2-24/10/0		0	0	0	1		53
AB-000233	P	8	IGHV3-15/18/IGKV1-5/10/0		0	0	0	1		40
AB-000238	P	233	IGHV3-30/15/IGLV6-57/11/0		0	0	0	1		60
AB-000239	P	39	IGHV3-33/15/IGKV1-5/11/0		0	0	0	1		37
AB-000241	P	229	IGHV6-1/13/IGKV2-28/10/0		0	0	0	1		54
AB-000243	P	15	IGHV3-23/17/IGKV3-15/11/0		0	0	0	1		53
AB-000245	P	5	IGHV3-21/17/IGLV3-21/13/0		0	0	0	1		28
AB-000247	P	8	IGHV4-61/20/IGKV3-20/10/0		0	0	0	1		35
AB-000248	P	5	IGHV2-70D/11/IGLV2-11/11/0		0	0	0	1		37
AB-000250	P	3	IGHV3-49/14/IGKV2D-29/10/0		0	0	0	1		28
AB-000253	P	8	IGHV3-23/21/IGLV2-8/11/0		0	0	0	1		51
AB-000255	P	8	IGHV4-39/16/IGKV3-11/11/0		0	0	0	1		39
AB-000256	P	53	IGHV4-39/18/IGKV3-15/9/0		0	0	0	1		54
AB-000260	P	6	IGHV3-11/13/IGLV9-49/14/0		0	0	0	1		82
AB-000264	P	22	IGHV3-73/16/IGKV1-5/10/0		0	0	0	1		55
AB-000282	P	22	IGHV4-39/23/IGLV1-40/14/0		0	0	0	1		41
AB-000283	P	48	IGHV3-33/15/IGKV1-39/12/0		0	0	0	1		64
AB-000294	P	64	IGHV3-30/15/IGKV1D-13/10/0		0	0	0	1		47
AB-000318	P	46	IGHV3-23/22/IGLV3-19/12/0		0	0	0	1		50
AB-000323	P	29	IGHV1-69/19/IGKV4-1/10/0		0	0	0	1		56
AB-000329	P	51	IGHV4-61/19/IGKV3-11/12/0		0	0	0	1		39
AB-000333	P	233	IGHV3-33/15/IGKV1-39/11/0		0	0	0	1		49
AB-000335	P	39	IGHV3-21/17/IGLV3-21/12/0		0	0	0	1		40
AB-000336	P	41	IGHV4-4/15/IGKV1-39/18/0		0	0	0	1		46
AB-000352	P	41	IGHV3-21/14/IGLV3-21/11/1		0	0	0	1		33
AB-000362	P	205	IGHV3-21/23/IGKV3-15/10/0		0	0	0	1		35
AB-000379	P	40	IGHV1-3/15/IGKV3-11/11/0		0	0	0	1		43
AB-000389	P	34	IGHV3-48/18/IGKV1-5/11/0		0	0	0	1		37
AB-000396	P	22	IGHV4-39/23/IGKV3-20/10/0		0	0	0	1		38
AB-001391	P	209	IGHV1-18/21/IGLV6-57/10/0		0	0	0	1		9
AB-001392	NP	25	IGHV4-59/22/IGKV1-33/9/0		0	0	0	1		44
AB-001396	P	229	IGHV3-33/21/IGKV1-5/9/0		0	0	0	1		10
AB-001430	P	216	IGHV3-33/16/IGKV4-1/9/0		0	0	0	1		2
AB-001454	P	207	IGHV1-18/11/IGKV1-39/10/0		0	0	0	1		44
AB-001463	NP	49	IGHV3-11/22/IGKV3-20/9/0		0	0	0	1		29
AB-001477	NP	202	IGHV4-39/17/IGKV1-33/10/0		0	0	0	1		12
AB-001478	NP	25	IGHV3-33/18/IGKV3-11/9/0		0	0	0	1		30
AB-001487	P	229	IGHV5-51/18/IGKV3-20/10/0		0	0	0	1		9
AB-001509	NP	25	IGHV3-23/22/IGKV3-20/10/0		0	0	0	1		47
AB-001513	P	203	IGHV3-33/14/IGLV1-40/12/0		0	0	0	1		4
AB-001528	P	52	IGHV3-33/17/IGKV3-15/9/0		0	0	0	1		30
AB-001543	P	203	IGHV3-48/23/IGKV3-20/10/0		0	0	0	1		9
AB-001548	NP	202	IGHV1-18/22/IGKV4-1/10/0		0	0	0	1		3
AB-001556	NP	202	IGHV3-21/13/IGLV2-8/12/0		0	0	0	1		6
AB-001570	P	203	IGHV1-69/20/IGKV3D-20/9/0		0	0	0	1		19
AB-001577	NP	25	IGHV3-49/14/IGKV3-20/10/0		0	0	0	1		27
AB-000251	P	46	IGHV1-2/14/IGKV1-9/10/0		0	0	0	1 (tie)		38
AB-000258	P	15	IGHV1-45/27/IGLV2-8/11/0		0	0	0	1 (tie)		53
AB-000353	P	233	IGHV1-18/21/IGKV1-39/11/0		0	0	0	1 (tie)		33
AB-000220	P	15	IGHV3-48/22/IGLV8-61/11/0		0	0	0	0		66
AB-000267	P	40	IGHV3-74/7/IGLV10-54/12/0		0	0	0	0		52
AB-001533	P	38	IGHV3-30/16/IGKV2-24/9/0		0	0	0	0		20
										ID, identifier; P3D, post-third-dose RTS,S; P, protected; NP, not protected
										aproperties of clone selected for screening within the clone's lineage, '1' indicates that the clone has the indicated property, '0' that it does not (see methods)
										b'tie' indicates that the clone shares property with a separate, distinct clone that was not selected for screening from same lineage (see methods)
